# Supplementary material for: Selection on Plant Male Function Genes Identifies Candidates for Reproductive Isolation of Yellow Monkeyflowers
Source: PLoS Genet. 2013 Dec 5;9(12):e1003965. doi: 10.1371/journal.pgen.1003965 (PMC3854799; doi:10.1371/journal.pgen.1003965)
Supplement: File S3 — Molecular Evolution of Mimulus Pollen Tube Proteins. Adaptive Divergence Worksheet. For the 2,554 pollen tube proteins (PTPs) identified, we assembled and mapped publicly available (NCBI SRA) Illumina reads for 10 members of the M. guttatus species complex (M. tilingii, M. platycalyx, M. pardalis, M. nudatus, M. nasutus, M. micranthus, M. glaucescens, M. dentilobus, M. cupriphilus) and a dune ecotype of M. guttatus [17] to the M. guttatus (IM62 v. 1.1) reference sequence (phytozome.org). Sequences were assembled into alignments for each PTP if they covered >75% of the IM62 reference CDS, from which codon substitution models (M8a and M8) were fit using codeml in the PAML computer package [93] with CDS-specific neighbor joining topologies. The p-values from χ2 -tests comparing models M8a with M8 are shown for each PTP, which constitute statistical support for the model (M8) that identifies a subset of sites as being under positive selection; corresponding q-values [97] control for multiple testing, with significance among PTPs set at a false discovery rate (FDR) of 0.10. Manual validation of the subset of alignments with FDR<0.10 confirmed statistical support for positive selection for all but two PTPs (*). Polymorphism and Selection Worksheet. PTP Exomes of 28 wild collected individuals from the Cone Peak population of M. guttatus [81] were captured on a custom Agilent micro-array and Illumina sequenced, after which reads were assembled and mapped to IM62 CDSs. Mean read depth was high (133/bp), with 92% of the target sequence for the 2,554 PTPs covered at a minimum read depth of 10. Base calls were made for sites with ≥10 reads, from which measures of nucleotide diversity per site (expected heterozygosity) and Tajima's D [64] were made after excluding sites with missing data and those that violate the infinite sites model [88]. The empirical distribution of Tajima's D among 2,352 PTPs shows no evidence of confounding demographic forces at Cone Peak (see Fig. 3B), th [file pgen.1003965.s004.xls]

## Sheet: Polymorphism and Selection
PTP Gene Model	Number of Called Bases	Number of Variable Bases	Nucleotide Diversity	Tajima's D	p-value	Fay and Wu's H (M. tilingii)	p-value	Fay and Wu's H (M. cupriphilus)	p-value
mgv1a009057m	861	12	0.000516196	-2.42622	0.0001	-3.48847	0.0587	-3.48847	0.0598
mgv1a006703m	1054	40	0.00256452	-2.33068	0.0008	-25.0035	0.0063	-38.2166	0.0013
mgv1a002698m	1824	40	0.0014945	-2.30219	0.0004	-42.7286	0.0004	-46.4753	0.0007
mgv1a002706m	1821	39	0.00145845	-2.29875	0.0008	-40.9052	0.001	-46.4701	0.0006
mgv1a001307m	1479	9	0.000225378	-2.29412	0.0003	0.29071	0.4339	0.32704	0.4349
mgv1a010372m	642	15	0.00185283	-2.26302	0.0016	-15.6855	0.0023	-11.9355	0.0045
mgv1a007013m	1075	26	0.00162489	-2.23249	0.0012	-15.3377	0.0083	-17.2286	0.006
mgv1a005342m	1207	33	0.00202522	-2.19809	0.0021	-13.6716	0.0221	-17.1488	0.0136
mgv1a005874m	1207	33	0.00202522	-2.19809	0.0021	-13.6716	0.0198	-17.1488	0.0127
mgv1a002879m	1171	8	0.000273382	-2.18057	0.0006	-5.50519	0.0107	-3.61429	0.0377
mgv1a006379m	833	25	0.00228336	-2.15554	0.0031	-16.6041	0.0065	-16.6041	0.0088
mgv1a021022m	1043	31	0.00226997	-2.15176	0.0016	-12.6709	0.021	-18.1803	0.0104
mgv1a009355m	763	27	0.00265054	-2.1461	0.0022	-17.1628	0.0098	-13.4256	0.0161
mgv1a007618m	1194	38	0.00253363	-2.13802	0.0018	2.69182	0.6884	-17.297	0.0177
mgv1a002111m	1744	54	0.00257953	-2.10836	0.0021	-28.5299	0.0125	-36.1286	0.0052
mgv1a003210m	1601	30	0.00147968	-2.10661	0.0024	-14.4263	0.0182	-18.6471	0.006
mgv1a001261m	2466	35	0.00114995	-2.1031	0.0039	-16.9308	0.0147	-18.9937	0.009
mgv1a007511m	1206	40	0.00273557	-2.10198	0.0027	2.93781	0.7026	-18.9378	0.0159
mgv1a002839m	1568	6	0.000136662	-2.08095	0.0012	-1.75325	0.0703	-5.68052	0.0063
mgv1a010957m	769	11	0.00087147	-2.07524	0.0022	0.587	0.5503	-1.33892	0.1472
mgv1a005244m	1446	51	0.00304897	-2.07304	0.0037	-32.2851	0.0067	-40.3522	0.0036
mgv1a006210m	1354	29	0.00176096	-2.05145	0.0034	-29.1712	0.0006	-15.3823	0.0137
mgv1a001635m	1971	43	0.00190285	-2.0393	0.0046	-21.6939	0.0128	-21.6939	0.012
mgv1a015378m	366	13	0.00254266	-2.03689	0.0052	-6.30204	0.0241	-6.30204	0.0238
mgv1a003913m	1614	45	0.00248957	-2.01333	0.0053	-25.6184	0.0088	-25.3976	0.0129
mgv1a025258m	1188	34	0.0024829	-2.01129	0.0048	-18.3732	0.0084	-18.0573	0.0117
mgv1a002403m	1755	64	0.00336425	-2.00607	0.0038	-15.6254	0.0594	-48.6066	0.0034
mgv1a008624m	789	5	0.000333533	-2.00549	0.004	NA	NA	NA	NA
mgv1a007869m	870	9	0.000606807	-2.00315	0.0034	-3.27143	0.0448	-1.38052	0.1317
mgv1a006138m	1119	5	0.000212775	-2.00103	0.0034	-1.71893	0.067	-5.62137	0.0064
mgv1a012815m	528	12	0.00156189	-1.98521	0.0047	0.77662	0.5927	0.77662	0.5974
mgv1a008404m	899	9	0.00063274	-1.96503	0.0041	-1.42837	0.121	-3.31516	0.0458
mgv1a013602m	601	26	0.0037487	-1.96422	0.0066	1.9399	0.7018	-1.98463	0.1899
mgv1a002664m	1421	18	0.001054	-1.95139	0.0068	-5.9457	0.0432	-5.9457	0.0439
mgv1a005162m	985	59	0.00590821	-1.94369	0.007	-31.5853	0.0111	-19.8302	0.0351
mgv1a001125m	1886	50	0.00251773	-1.93799	0.0077	-28.6122	0.0072	-26.8316	0.0078
mgv1a013862m	581	24	0.00362997	-1.92989	0.0082	1.80294	0.6951	-2.12159	0.1737
mgv1a008627m	988	35	0.00331653	-1.91168	0.0085	-20.5031	0.0118	-10.949	0.0383
mgv1a008669m	988	35	0.00331653	-1.91168	0.0093	-20.5031	0.0091	-10.949	0.041
mgv1a008742m	771	10	0.000901174	-1.90797	0.0059	-3.25974	0.0504	-5.18052	0.0206
mgv1a006387m	820	5	0.000279587	-1.90565	0.0032	-3.65762	0.0103	-1.69683	0.0542
mgv1a024423m	322	9	0.00190763	-1.90155	0.0061	NA	NA	NA	NA
mgv1a000017m	6864	85	0.0012269	-1.8996	0.0078	-89.739	0.0006	-80.2844	0.0015
mgv1a003052m	1361	17	0.00114366	-1.89179	0.0104	-7.59034	0.0261	-0.21256	0.2927
mgv1a015237m	414	18	0.00376582	-1.88179	0.0106	-13.5206	0.0042	-13.5206	0.0041
mgv1a009053m	881	9	0.000701682	-1.87683	0.0084	-3.27273	0.0432	-1.30909	0.1354
mgv1a003437m	1459	44	0.00295522	-1.87602	0.011	-30.6974	0.0049	-19.5276	0.0189
mgv1a007974m	995	35	0.00333355	-1.87331	0.0111	-5.87532	0.0975	-9.57922	0.0534
mgv1a017023m	252	16	0.00541579	-1.86927	0.0096	-0.25157	0.2994	-1.83648	0.1549
mgv1a018646m	982	22	0.00206968	-1.86752	0.009	-0.36652	0.2819	-2.36501	0.1465
mgv1a010510m	675	16	0.00202604	-1.86684	0.0105	-19.0384	0.0007	-17.2271	0.0014
mgv1a007351m	1181	7	0.000369228	-1.8667	0.0051	-7.27883	0.0035	-5.31656	0.0104
mgv1a003919m	1616	4	9.16758e-05	-1.8549	0.0045	0.14535	0.4049	0.14535	0.4141
mgv1a015751m	353	4	0.000419683	-1.8549	0.004	0.14535	0.4019	-1.81691	0.0456
mgv1a001633m	2098	19	0.00081739	-1.84326	0.0118	1.297	0.6852	1.54298	0.7224
mgv1a007360m	903	15	0.00164977	-1.84101	0.0131	-1.94359	0.1415	0.00513	0.3313
mgv1a005010m	1020	9	0.000635982	-1.83412	0.0096	-9.21169	0.0031	-3.32078	0.0444
mgv1a005428m	1058	6	0.000331427	-1.82106	0.0097	-3.44416	0.024	-1.55325	0.0833
mgv1a006075m	847	5	0.000340166	-1.81928
mgv1a000598m	2529	19	0.000681446	-1.81634
mgv1a002589m	1691	107	0.00667207	-1.81127
mgv1a009558m	870	26	0.00289297	-1.79314
mgv1a001167m	2261	62	0.00289817	-1.79146
mgv1a003264m	994	30	0.00302233	-1.78909
mgv1a007093m	1133	35	0.0031092	-1.78368
mgv1a000435m	2803	77	0.00290922	-1.78351
mgv1a009835m	951	25	0.00259023	-1.78129
mgv1a002500m	1488	33	0.00222385	-1.78074
mgv1a003460m	1726	43	0.00259281	-1.77938
mgv1a004959m	1340	11	0.000689425	-1.77335
mgv1a000883m	2036	43	0.00217737	-1.77309
mgv1a008517m	908	18	0.00219324	-1.76362
mgv1a007077m	893	4	0.000277084	-1.75924
mgv1a001630m	2312	48	0.00220767	-1.75674
mgv1a001880m	1852	5	0.000156969	-1.7532
mgv1a018532m	756	5	0.000384532	-1.7532
mgv1a001108m	2587	5	0.000112912	-1.75016
mgv1a020027m	1214	26	0.00304718	-1.74862
mgv1a004218m	1569	34	0.00225633	-1.74804
mgv1a000917m	2657	75	0.00308929	-1.74701
mgv1a016040m	350	15	0.00391837	-1.74633
mgv1a001027m	1927	96	0.00550963	-1.74426
mgv1a000181m	3486	97	0.00309113	-1.73691
mgv1a006475m	1045	37	0.00385509	-1.73383
mgv1a012543m	461	12	0.00242065	-1.7257
mgv1a005094m	1037	36	0.00365064	-1.7188
mgv1a006960m	817	7	0.000627096	-1.71839
mgv1a004085m	1625	36	0.00236693	-1.71463
mgv1a004374m	1575	52	0.00364713	-1.70054
mgv1a008780m	784	3	0.000478316	-1.69654
mgv1a002209m	2035	52	0.00279524	-1.69558
mgv1a016569m	243	8	0.00292241	-1.69119
mgv1a022605m	320	3	0.000347222	-1.68784
mgv1a002902m	1409	3	7.88581e-05	-1.68784
mgv1a008397m	872	3	0.000127421	-1.68784
mgv1a008345m	959	21	0.00225092	-1.68528
mgv1a004611m	1156	3	9.26841e-05	-1.6838
mgv1a003751m	1100	25	0.0040303	-1.68327
mgv1a003287m	1423	5	0.000227372	-1.68181
mgv1a016677m	318	5	0.00102185	-1.67877
mgv1a011448m	605	4	0.000376451	-1.67082
mgv1a000513m	3002	35	0.00128403	-1.66082
mgv1a002501m	1530	32	0.00226381	-1.65561
mgv1a026419m	1477	4	0.000181787	-1.65305
mgv1a002395m	1713	52	0.0034143	-1.64729
mgv1a003561m	1485	69	0.00529582	-1.64711
mgv1a009067m	928	22	0.00252039	-1.64336
mgv1a023758m	482	25	0.00616142	-1.64228
mgv1a011042m	694	17	0.00247857	-1.64148
mgv1a012042m	544	20	0.00393571	-1.63639
mgv1a015345m	350	14	0.00406809	-1.62917
mgv1a008395m	1074	42	0.00439249	-1.62773
mgv1a007938m	918	41	0.00501938	-1.62403
mgv1a003321m	1697	29	0.00189466	-1.62313
mgv1a010980m	658	5	0.00052106	-1.62184
mgv1a004020m	1439	34	0.00266413	-1.61719
mgv1a015152m	345	12	0.00380077	-1.61691
mgv1a002139m	1912	28	0.00161421	-1.60581
mgv1a007436m	830	39	0.00790742	-1.60338
mgv1a000551m	2936	33	0.00127552	-1.60222
mgv1a000616m	2743	11	0.000389786	-1.60037
mgv1a000628m	2737	11	0.00039064	-1.60037
mgv1a008525m	840	13	0.00156817	-1.59302
mgv1a002986m	1486	4	0.000164741	-1.59189
mgv1a009592m	1011	19	0.00203146	-1.58875
mgv1a000985m	1888	16	0.000898314	-1.5808
mgv1a008905m	641	3	0.000237657	-1.57794
mgv1a006868m	1004	3	0.000146166	-1.57792
mgv1a009509m	892	3	0.000164519	-1.57792
mgv1a000687m	2741	3	5.16448e-05	-1.57765
mgv1a005403m	976	3	0.000184123	-1.57449
mgv1a004211m	1383	28	0.0023036	-1.57439
mgv1a003306m	1230	44	0.00420423	-1.57428
mgv1a012557m	570	6	0.000847573	-1.56859
mgv1a001922m	1506	59	0.00469633	-1.56422
mgv1a000827m	2210	12	0.000545337	-1.56264
mgv1a009275m	708	24	0.00385432	-1.55106
mgv1a008194m	788	7	0.000821506	-1.54976
mgv1a007044m	1030	39	0.0044785	-1.54975
mgv1a003307m	1636	6	0.000307546	-1.54906
mgv1a005993m	1322	57	0.00521677	-1.54395
mgv1a007412m	836	5	0.000523483	-1.54249
mgv1a007027m	1002	13	0.00136624	-1.53937
mgv1a013810m	628	21	0.0037767	-1.53865
mgv1a008501m	783	18	0.00251945	-1.53506
mgv1a006980m	997	6	0.000504761	-1.53023
mgv1a000509m	3183	14	0.000474876	-1.52193
mgv1a002903m	1680	31	0.00218587	-1.5188
mgv1a003078m	1677	31	0.00218978	-1.5188
mgv1a000269m	3095	38	0.00146046	-1.51441
mgv1a004733m	1146	19	0.00187996	-1.51318
mgv1a010718m	710	4	0.000407476	-1.49604
mgv1a001788m	1883	73	0.00480444	-1.49267
mgv1a004598m	1326	8	0.000590248	-1.49053
mgv1a008051m	848	14	0.00182449	-1.48718
mgv1a001756m	1663	9	0.000547956	-1.48653
mgv1a010414m	714	24	0.00392157	-1.48589
mgv1a011691m	616	6	0.000925382	-1.48475
mgv1a006830m	865	6	0.000633833	-1.48291
mgv1a001330m	2380	9	0.000385815	-1.47676
mgv1a002794m	1343	3	0.000130064	-1.47551
mgv1a005447m	1197	3	0.000151205	-1.47231
mgv1a008795m	1071	3	0.000168994	-1.47231
mgv1a015927m	332	11	0.00366363	-1.4696
mgv1a010735m	617	2	0.000135062	-1.46879
mgv1a015693m	271	3	0.000698491	-1.46395
mgv1a011945m	583	2	0.000127057	-1.45589
mgv1a002880m	1563	2	4.73922e-05	-1.45589
mgv1a005232m	1309	8	0.000615531	-1.4552
mgv11b009377m	511	3	0.000400758	-1.45394
mgv1a006949m	836	8	0.000950724	-1.45238
mgv1a011779m	606	2	0.000117869	-1.45172
mgv1a015646m	375	2	0.000190476	-1.45172
mgv1a012394m	683	5	0.000630261	-1.44939
mgv1a006325m	1106	33	0.00366595	-1.43815
mgv1a000214m	3388	18	0.000620218	-1.43363
mgv1a001641m	1387	21	0.00184649	-1.43132
mgv1a010674m	695	17	0.00315678	-1.42959
mgv1a010991m	884	21	0.00288141	-1.41799
mgv1a006328m	866	4	0.000387425	-1.41645
mgv1a005402m	1443	16	0.00130852	-1.41344
mgv1a006171m	1261	12	0.00108008	-1.40921
mgv1a002785m	1122	11	0.00111509	-1.40547
mgv1a012053m	520	18	0.00411339	-1.40391
mgv1a007367m	1069	51	0.00705896	-1.40005
mgv1a000581m	2706	47	0.00221873	-1.39979
mgv1a008117m	583	7	0.00122185	-1.37863
mgv1a018028m	922	10	0.00129628	-1.37842
mgv1a001214m	2234	22	0.00121266	-1.37709
mgv1a009294m	798	3	0.000262019	-1.36937
mgv1a005309m	982	9	0.000999154	-1.36883
mgv1a003324m	1600	5	0.000287338	-1.36759
mgv1a008289m	790	27	0.00499699	-1.36632
mgv1a013685m	511	3	0.000411721	-1.36536
mgv1a004399m	1367	39	0.00371848	-1.36502
mgv1a010310m	653	16	0.00320524	-1.3632
mgv1a007114m	1214	3	0.000178445	-1.36238
mgv1a020266m	1521	3	0.000142427	-1.36238
mgv1a014214m	514	12	0.00273679	-1.35963
mgv1a020091m	840	10	0.00146607	-1.35946
mgv1a020766m	3323	101	0.00408155	-1.3435
mgv1a017528m	175	3	0.00134344	-1.34093
mgv1a000627m	2223	9	0.000451595	-1.33702
mgv1a004113m	1534	9	0.000669201	-1.3254
mgv1a022713m	3472	78	0.00306073	-1.32348
mgv1a003790m	1394	22	0.00202575	-1.32314
mgv1a001103m	2592	82	0.00431716	-1.32246
mgv1a019620m	1902	94	0.00671542	-1.3148
mgv1a008163m	826	2	0.000128141	-1.31445
mgv1a000609m	3084	2	3.55751e-05	-1.31366
mgv1a000606m	2910	2	3.77022e-05	-1.31366
mgv1a007208m	883	2	0.000134051	-1.31113
mgv1a027056m	698	4	0.000510736	-1.30786
mgv1a022265m	1672	30	0.00237354	-1.30705
mgv1a009196m	688	6	0.000950403	-1.30313
mgv1a002114m	1852	50	0.00366499	-1.30305
mgv1a011486m	653	2	0.000215213	-1.30048
mgv1a002755m	1446	3	0.000196829	-1.30016
mgv1a005080m	1409	5	0.00035511	-1.29749
mgv1a000417m	3043	12	0.000474796	-1.29655
mgv1a011838m	590	2	0.000277105	-1.2844
mgv1a012410m	411	2	0.000397791	-1.2844
mgv1a001988m	1229	5	0.000465899	-1.27657
mgv1a015883m	351	10	0.00357641	-1.27588
mgv1a013201m	513	4	0.000725298	-1.26822
mgv1a011096m	661	7	0.0011957	-1.2655
mgv1a007122m	981	5	0.000740218	-1.26333
mgv1a001840m	1932	3	0.000129128	-1.26108
mgv1a000879m	2465	61	0.0034114	-1.26061
mgv1a009017m	730	6	0.000896968	-1.26032
mgv1a003013m	1629	4	0.000234653	-1.25976
mgv1a001989m	1903	4	0.000200867	-1.25976
mgv1a001222m	2558	5	0.000202431	-1.25951
mgv1a006961m	1176	31	0.00358379	-1.25572
mgv1a018181m	1390	68	0.00685138	-1.2557
mgv1a005015m	976	31	0.00460957	-1.25378
mgv1a011319m	612	3	0.000412208	-1.25246
mgv1a014965m	411	8	0.00247167	-1.25225
mgv1a006922m	903	8	0.00102472	-1.25216
mgv1a000005m	9692	93	0.00134131	-1.2516
mgv1a019816m	937	23	0.00362723	-1.24739
mgv1a010062m	655	6	0.00108124	-1.24633
mgv1a000037m	5344	15	0.000358941	-1.2422
mgv1a009313m	955	4	0.000410506	-1.23489
mgv1a008394m	957	9	0.00114059	-1.23458
mgv1a008352m	960	9	0.00113703	-1.23458
mgv1a007125m	1255	28	0.00304749	-1.23451
mgv1a002782m	1157	7	0.000690321	-1.23191
mgv1a000245m	2839	34	0.00167618	-1.22901
mgv1a000019m	6070	23	0.000508462	-1.22238
mgv1a000799m	2189	32	0.00200204	-1.22129
mgv1a000400m	2945	132	0.00639274	-1.2181
mgv1a003795m	1648	12	0.000931184	-1.21789
mgv1a008393m	690	5	0.000766046	-1.21787
mgv1a009579m	727	6	0.000931429	-1.21774
mgv1a027004m	1147	37	0.00473152	-1.2171
mgv1a006055m	874	26	0.0042399	-1.21378
mgv1a019806m	777	19	0.00328631	-1.21354
mgv1a001154m	2454	8	0.000394114	-1.20789
mgv1a000055m	5548	12	0.00027824	-1.20782
mgv1a009035m	858	42	0.00690667	-1.20652
mgv1a006574m	890	5	0.000667506	-1.20346
mgv1a003658m	1275	50	0.00601489	-1.20256
mgv1a000479m	2603	18	0.000930765	-1.202
mgv1a011941m	717	8	0.00135766	-1.19826
mgv1a000707m	2795	75	0.00386509	-1.19758
mgv1a012363m	570	19	0.00538342	-1.1965
mgv1a011738m	596	3	0.000509031	-1.19263
mgv1a004737m	915	7	0.000969351	-1.19196
mgv1a018228m	415	15	0.00523628	-1.19012
mgv1a008952m	781	5	0.000693417	-1.18963
mgv1a007801m	1095	13	0.00154362	-1.18479
mgv1a001041m	1577	11	0.000923997	-1.18407
mgv1a011293m	520	2	0.00026973	-1.17718
mgv1a007455m	864	2	0.000166615	-1.17701
mgv1a012945m	412	2	0.000349406	-1.17701
mgv1a013634m	389	2	0.000370065	-1.17701
mgv1a005276m	1400	8	0.000706299	-1.1747
mgv1a005814m	933	7	0.000962041	-1.17401
mgv1a006771m	1173	2	0.000123916	-1.17143
mgv1a004485m	1510	5	0.000370232	-1.16989
mgv1a004237m	1055	7	0.000826385	-1.16972
mgv1a020814m	960	34	0.00504091	-1.16889
mgv1a010242m	665	3	0.000428674	-1.16852
mgv1a004276m	1524	11	0.00094092	-1.16624
mgv1a007594m	1103	30	0.00385709	-1.16418
mgv1a003353m	1518	20	0.00182437	-1.16291
mgv1a001019m	1960	1	4.63822e-05	-1.1624
mgv1a000998m	1960	1	4.63822e-05	-1.1624
mgv1a015230m	406	6	0.00174187	-1.16052
mgv1a003958m	1087	33	0.00548864	-1.15842
mgv1a006985m	1012	44	0.00621503	-1.15829
mgv1a014165m	364	2	0.00043059	-1.15782
mgv1a006578m	1222	4	0.000346547	-1.15495
mgv1a012206m	472	3	0.000626081	-1.15457
mgv1a006235m	883	26	0.00431917	-1.1528
mgv1a000286m	3675	83	0.00329216	-1.15084
mgv1a009795m	992	41	0.00598076	-1.149
mgv1a014991m	387	13	0.00508342	-1.14724
mgv1a004465m	1049	6	0.000672873	-1.14411
mgv1a000559m	2686	7	0.000316939	-1.14256
mgv1a001969m	1943	15	0.00105847	-1.13633
mgv1a016639m	257	3	0.0011503	-1.13595
mgv1a023703m	343	6	0.00231949	-1.13385
mgv1a016581m	223	1	0.000236016	-1.12863
mgv1a015114m	274	1	0.000192086	-1.12863
mgv1a000655m	2017	98	0.00717537	-1.12668
mgv1a016396m	303	1	0.000165017	-1.12411
mgv1a016432m	258	1	0.000193798	-1.12411
mgv1a002436m	1630	42	0.00378087	-1.11967
mgv1a004105m	1374	9	0.000854951	-1.11838
mgv1a001471m	2047	12	0.000793717	-1.11797
mgv1a014839m	368	1	0.000123518	-1.1153
mgv1a006718m	1003	22	0.00313177	-1.11366
mgv1a017810m	160	1	0.000271739	-1.11103
mgv1a015286m	389	1	0.000111769	-1.11103
mgv1a009547m	671	8	0.00157912	-1.10987
mgv1a009603m	668	8	0.00158622	-1.10987
mgv1a001565m	2268	30	0.00192543	-1.10795
mgv1a003262m	1380	25	0.00261801	-1.10389
mgv1a015079m	359	1	0.000111421	-1.1028
mgv1a001494m	1844	5	0.000449951	-1.10215
mgv1a017250m	169	1	0.000227583	-1.09883
mgv1a014684m	529	8	0.00196698	-1.09548
mgv11b018210m	617	35	0.0086526	-1.09514
mgv1a005023m	1360	1	2.72331e-05	-1.09496
mgv1a004995m	1363	1	2.71732e-05	-1.09496
mgv1a003282m	1445	1	2.56312e-05	-1.09496
mgv1a003707m	1372	1	2.69949e-05	-1.09496
mgv1a007459m	881	1	4.20398e-05	-1.09496
mgv1a017412m	166	1	0.000223115	-1.09496
mgv1a012800m	480	1	7.71605e-05	-1.09496
mgv1a013431m	480	1	7.71605e-05	-1.09496
mgv1a004003m	1258	1	2.94412e-05	-1.09496
mgv1a016079m	393	1	9.42418e-05	-1.09496
mgv1a012445m	581	1	6.37471e-05	-1.09496
mgv1a014896m	497	1	7.45212e-05	-1.09496
mgv1a014126m	575	1	6.44122e-05	-1.09496
mgv1a001361m	2094	1	1.76872e-05	-1.09496
mgv1a005703m	1156	1	3.2039e-05	-1.09496
mgv1a003081m	1466	1	2.5264e-05	-1.09496
mgv1a005885m	1259	1	2.94178e-05	-1.09496
mgv1a007788m	1113	3	0.000273121	-1.09296
mgv1a007763m	1113	3	0.000273121	-1.09296
mgv1a012196m	578	1	6.17894e-05	-1.09119
mgv1a006874m	966	1	3.69713e-05	-1.09119
mgv1a013814m	344	1	0.000103821	-1.09119
mgv1a016317m	340	1	0.000105042	-1.09119
mgv1a015580m	351	1	0.00010175	-1.09119
mgv1a005359m	1244	5	0.000479169	-1.08938
mgv1a002348m	1780	41	0.0033883	-1.08864
mgv1a007440m	722	36	0.00745896	-1.08834
mgv1a012386m	503	7	0.00202484	-1.08814
mgv1a000430m	2706	64	0.00352295	-1.08786
mgv1a009555m	639	21	0.00504554	-1.08732
mgv1a022205m	1506	22	0.00249272	-1.08729
mgv1a006591m	1070	27	0.00410922	-1.08606
mgv1a004133m	1402	80	0.00863397	-1.08485
mgv1a001759m	1819	8	0.000568673	-1.0848
mgv1a006401m	1216	4	0.000371819	-1.08211
mgv11b010237m	713	38	0.00896725	-1.07672
mgv1a002007m	1521	29	0.00307659	-1.07644
mgv1a005374m	1243	16	0.00183052	-1.07627
mgv1a004379m	1255	3	0.000247786	-1.07141
mgv1a018937m	1183	36	0.00475496	-1.0708
mgv1a022906m	891	7	0.00101802	-1.06747
mgv1a007303m	898	32	0.00525121	-1.06383
mgv1a002041m	1998	50	0.00378995	-1.05869
mgv1a004637m	871	7	0.00103553	-1.05651
mgv1a009480m	746	3	0.000424346	-1.05416
mgv1a027011m	731	4	0.000703855	-1.05382
mgv1a000229m	3619	18	0.000721984	-1.05241
mgv1a003799m	1104	14	0.00214396	-1.05106
mgv1a012444m	627	8	0.00171081	-1.04623
mgv1a001239m	1979	4	0.000232309	-1.04529
mgv1a002235m	1488	2	0.000116517	-1.04508
mgv1a011618m	655	2	0.000264697	-1.04508
mgv1a002063m	1667	13	0.00141756	-1.04354
mgv1a013564m	544	6	0.00168095	-1.04341
mgv1a004356m	1131	8	0.00127821	-1.04333
mgv1a000787m	2369	15	0.000912969	-1.0386
mgv1a008891m	829	6	0.000918804	-1.03768
mgv1a005542m	1177	6	0.000647696	-1.03644
mgv1a004748m	1245	51	0.00626573	-1.03635
mgv1a002080m	1533	6	0.000497708	-1.03521
mgv1a011132m	801	8	0.00134877	-1.03445
mgv1a008054m	1065	8	0.00101771	-1.0291
mgv1a004697m	1414	16	0.00164868	-1.02759
mgv1a010606m	662	3	0.000550895	-1.02708
mgv1a010528m	573	3	0.000580417	-1.02197
mgv1a004204m	1429	24	0.002517	-1.02061
mgv1a007536m	800	5	0.000918651	-1.01835
mgv1a012798m	498	6	0.00159159	-1.01809
mgv1a011693m	772	4	0.000620965	-1.01283
mgv1a011564m	783	4	0.000612241	-1.01283
mgv1a005982m	870	51	0.00905805	-1.01201
mgv1a011584m	660	53	0.0124314	-1.00973
mgv1a012269m	546	3	0.000606661	-1.0089
mgv1a012822m	614	3	0.000539474	-1.0089
mgv1a016650m	299	17	0.00859463	-1.0083
mgv1a012197m	518	5	0.00134754	-1.00489
mgv1a000020m	7135	24	0.000507826	-1.00438
mgv1a012224m	474	5	0.00145405	-0.997291
mgv1a001514m	1829	64	0.00586816	-0.996494
mgv1a026620m	2720	38	0.00213379	-0.996279
mgv1a010982m	776	7	0.00122652	-0.991573
mgv1a003584m	1642	61	0.00581563	-0.989795
mgv1a007031m	1087	4	0.000449374	-0.989731
mgv1a000877m	2344	30	0.00196556	-0.987784
mgv1a003330m	1232	12	0.00140095	-0.984304
mgv1a014740m	380	2	0.000564705	-0.982206
mgv1a010507m	831	3	0.000403207	-0.980833
mgv1a013816m	399	23	0.00879557	-0.976167
mgv1a003534m	1498	29	0.00295589	-0.974606
mgv1a000123m	4178	28	0.00102392	-0.969925
mgv1a003928m	1464	56	0.00603585	-0.965932
mgv1a007291m	857	10	0.00180086	-0.962276
mgv1a003728m	1420	10	0.00101918	-0.960335
mgv1a026945m	1292	10	0.00112015	-0.960335
mgv1a022828m	407	12	0.00434568	-0.958407
mgv1a001812m	1903	30	0.002453	-0.957394
mgv1a014045m	562	8	0.00198849	-0.957293
mgv1a014168m	551	8	0.00202819	-0.957293
mgv1a013006m	653	3	0.000532938	-0.957171
mgv1a000814m	1974	20	0.00154949	-0.95517
mgv1a000357m	2687	7	0.000357904	-0.955024
mgv1a009373m	773	5	0.000854304	-0.949623
mgv1a006581m	795	7	0.00122973	-0.947699
mgv1a007339m	980	22	0.00354102	-0.946447
mgv1a007615m	1045	72	0.0109004	-0.946427
mgv1a006438m	1258	17	0.00205644	-0.945543
mgv1a005340m	1138	5	0.000582753	-0.943547
mgv1a001345m	2139	6	0.000384526	-0.940969
mgv1a002514m	1482	3	0.000238596	-0.939928
mgv1a015509m	349	14	0.00611314	-0.938658
mgv1a015785m	353	3	0.00109901	-0.931525
mgv1a001218m	1630	22	0.0022559	-0.931019
mgv1a017328m	193	4	0.00265766	-0.927552
mgv1a007327m	827	4	0.000613232	-0.924743
mgv1a019605m	662	11	0.00248068	-0.918408
mgv1a017040m	230	14	0.00985385	-0.917597
mgv1a000186m	4155	10	0.000356386	-0.917225
mgv1a007420m	898	9	0.00145272	-0.916256
mgv1a000497m	2515	54	0.00349127	-0.914616
mgv1a013950m	583	19	0.00506309	-0.914426
mgv1a019142m	1416	4	0.000427092	-0.913751
mgv1a017275m	230	2	0.000897798	-0.912989
mgv1a001818m	1928	12	0.000941656	-0.906511
mgv1a001555m	1749	7	0.000572954	-0.906195
mgv1a006795m	989	5	0.000688213	-0.90557
mgv1a015554m	344	5	0.00195749	-0.902897
mgv1a000754m	2355	50	0.00339565	-0.902203
mgv1a001153m	1827	8	0.000646412	-0.901727
mgv1a021541m	242	3	0.00151602	-0.898976
mgv1a018656m	1375	6	0.000969697	-0.898918
mgv1a006308m	918	2	0.000232937	-0.898137
mgv1a020926m	1578	5	0.00043399	-0.896456
mgv1a021252m	316	3	0.00114869	-0.894715
mgv1a010908m	713	26	0.00581494	-0.887241
mgv1a012498m	672	1	0.00010436	-0.884826
mgv1a014306m	388	28	0.0116776	-0.883596
mgv1a006605m	1140	1	6.37513e-05	-0.881025
mgv1a009170m	851	1	8.54012e-05	-0.881025
mgv1a009214m	777	1	9.35347e-05	-0.881025
mgv1a008937m	1065	1	6.82408e-05	-0.881025
mgv1a024819m	1709	33	0.00311256	-0.880827
mgv1a015907m	350	14	0.00626589	-0.880687
mgv1a009778m	738	5	0.000928272	-0.877473
mgv1a005288m	1088	1	6.93151e-05	-0.876742
mgv1a016327m	341	10	0.00444084	-0.874116
mgv1a004735m	1219	60	0.00814653	-0.874038
mgv1a002304m	1877	41	0.003554	-0.872308
mgv1a002290m	1555	87	0.00922432	-0.87162
mgv1a000391m	2304	4	0.000229415	-0.870249
mgv1a008177m	744	28	0.00634123	-0.868669
mgv1a014629m	396	1	0.00020596	-0.86644
mgv1a013879m	333	1	0.000244926	-0.86644
mgv1a002695m	1666	21	0.00201087	-0.865617
mgv1a006587m	1137	4	0.00047325	-0.863597
mgv1a015282m	309	14	0.00701677	-0.85947
mgv1a010332m	786	48	0.0100243	-0.858855
mgv1a026395m	575	6	0.00161228	-0.857128
mgv1a014093m	473	10	0.00409172	-0.855665
mgv1a000298m	3321	30	0.00145454	-0.852383
mgv1a014677m	361	11	0.00475886	-0.850927
mgv1a011790m	658	5	0.00107371	-0.849366
mgv1a013313m	652	12	0.00286491	-0.848418
mgv1a012119m	648	6	0.00134586	-0.846496
mgv1a004155m	1469	70	0.00791099	-0.84608
mgv1a012316m	636	17	0.00426759	-0.840385
mgv1a012360m	532	9	0.00283401	-0.840013
mgv1a015453m	442	10	0.00348616	-0.839988
mgv1a007302m	1169	7	0.000891299	-0.838604
mgv1a000854m	1997	5	0.000352477	-0.836512
mgv1a015486m	345	1	0.000282423	-0.836027
mgv1a001404m	1756	35	0.00338404	-0.835639
mgv1a008628m	795	6	0.00121916	-0.834941
mgv1a009222m	576	8	0.00224079	-0.834175
mgv1a010902m	597	22	0.006173	-0.832746
mgv1a004307m	1254	9	0.0011006	-0.831277
mgv1a010162m	733	27	0.00596287	-0.831016
mgv1a001672m	2045	6	0.000425809	-0.829771
mgv1a001821m	2045	6	0.000425809	-0.829771
mgv1a014395m	462	22	0.00798832	-0.829263
mgv1a010571m	919	11	0.00189727	-0.820468
mgv1a002128m	1729	5	0.000411618	-0.819563
mgv1a002734m	1796	62	0.00577921	-0.819471
mgv1a023661m	514	17	0.00533762	-0.816118
mgv1a000365m	3286	12	0.000578232	-0.812788
mgv1a000371m	3273	12	0.000580529	-0.812788
mgv1a015755m	296	2	0.000886775	-0.811389
mgv1a000624m	2508	18	0.00149088	-0.809083
mgv1a008203m	891	9	0.00156782	-0.80784
mgv11b020468m	2294	110	0.00812072	-0.806007
mgv1a007315m	1032	15	0.00234292	-0.803936
mgv1a017873m	157	3	0.00250227	-0.802589
mgv1a002191m	1148	6	0.000780381	-0.801255
mgv1a023841m	698	2	0.000341397	-0.80053
mgv1a000350m	2848	11	0.00060603	-0.797184
mgv1a016841m	244	7	0.00442289	-0.796437
mgv1a003221m	1221	10	0.00129117	-0.794184
mgv1a002643m	1339	60	0.00789904	-0.793867
mgv1a005965m	1322	3	0.000303418	-0.793362
mgv1a005989m	1319	3	0.000304108	-0.793362
mgv1a011225m	732	5	0.00100239	-0.790123
mgv1a006304m	626	11	0.00372045	-0.789558
mgv1a010032m	866	7	0.00124188	-0.781685
mgv1a001484m	2150	3	0.000186047	-0.780558
mgv1a000546m	2533	10	0.000620126	-0.780315
mgv1a007617m	1045	35	0.00563329	-0.778687
mgv1a015742m	329	2	0.000741293	-0.77822
mgv1a011469m	729	21	0.00472628	-0.77669
mgv1a009414m	652	4	0.000877802	-0.776547
mgv1a009364m	655	4	0.000873782	-0.776547
mgv1a004497m	1378	34	0.00415332	-0.77479
mgv1a004397m	1197	37	0.00574219	-0.773713
mgv1a007676m	985	43	0.00732349	-0.772601
mgv1a004873m	1229	20	0.00269631	-0.772021
mgv1a001577m	1681	48	0.00480156	-0.771913
mgv1a013668m	448	3	0.000903003	-0.766539
mgv1a014281m	477	25	0.00896419	-0.764794
mgv1a005945m	894	28	0.00550962	-0.75951
mgv1a006269m	969	5	0.000813628	-0.757313
mgv1a002086m	1511	11	0.00116462	-0.756928
mgv1a010486m	873	3	0.000473879	-0.754566
mgv1a007972m	1055	31	0.00498309	-0.749887
mgv1a000230m	3186	20	0.00104027	-0.748354
mgv1a026523m	1051	13	0.00202862	-0.747709
mgv1a013881m	402	4	0.00151283	-0.744635
mgv1a021808m	192	3	0.00217287	-0.743789
mgv1a020724m	1014	8	0.00131492	-0.741813
mgv1a001049m	1855	1	7.41596e-05	-0.740994
mgv1a009419m	885	4	0.000664858	-0.735686
mgv1a002653m	1349	14	0.00184591	-0.733966
mgv1a007932m	825	31	0.00637072	-0.726296
mgv1a005304m	1313	74	0.00971157	-0.722804
mgv1a013753m	532	14	0.00438596	-0.720556
mgv1a015811m	331	23	0.0117119	-0.719409
mgv1a014163m	455	7	0.00247294	-0.718465
mgv1a000330m	3680	40	0.00187749	-0.716951
mgv1a006369m	1341	22	0.00279577	-0.712238
mgv1a000590m	3059	9	0.000479048	-0.71214
mgv1a000537m	3159	9	0.000463884	-0.71214
mgv1a013069m	498	3	0.000881895	-0.711338
mgv1a004151m	1144	77	0.0118752	-0.710682
mgv1a004216m	1138	77	0.0119378	-0.710682
mgv1a012863m	672	3	0.000637458	-0.709303
mgv1a010987m	788	28	0.00605017	-0.70864
mgv1a007409m	1085	4	0.000552609	-0.707262
mgv1a010963m	842	2	0.000306938	-0.705783
mgv1a001070m	1978	2	0.000130658	-0.705783
mgv1a006429m	986	6	0.000959626	-0.705451
mgv1a011212m	722	5	0.00107338	-0.700498
mgv1a001285m	2028	82	0.00759632	-0.69247
mgv1a009114m	869	4	0.000744459	-0.692172
mgv1a013999m	594	3	0.000730576	-0.69206
mgv1a007982m	875	8	0.00160478	-0.691096
mgv1a008910m	810	4	0.000740741	-0.6886
mgv1a008892m	813	4	0.000738007	-0.6886
mgv1a016204m	315	15	0.00799629	-0.688373
mgv1a003502m	876	11	0.00225128	-0.687094
mgv1a015813m	379	2	0.000704344	-0.686192
mgv1a006394m	886	2	0.000472123	-0.684821
mgv1a020896m	1294	8	0.00101204	-0.683293
mgv1a004532m	1100	11	0.00185051	-0.681917
mgv1a012291m	678	17	0.00428667	-0.681493
mgv1a011715m	788	45	0.0100219	-0.679882
mgv1a005258m	1285	1	8.32049e-05	-0.675481
mgv1a014358m	516	1	0.000207206	-0.675481
mgv1a012906m	529	1	0.000202114	-0.675481
mgv1a008127m	543	1	0.000196903	-0.675481
mgv1a015449m	308	1	0.000347137	-0.675481
mgv1a015555m	429	13	0.00513765	-0.673037
mgv1a000878m	2660	44	0.00291189	-0.670521
mgv1a013082m	516	22	0.00732155	-0.669512
mgv1a003664m	1210	31	0.00444027	-0.669423
mgv1a010511m	851	32	0.00658411	-0.668858
mgv1a008531m	894	41	0.00799486	-0.668787
mgv1a002624m	1246	44	0.00622537	-0.666596
mgv1a025191m	263	18	0.0120431	-0.666552
mgv1a002035m	1804	109	0.010775	-0.661381
mgv1a003036m	1539	41	0.00516028	-0.660648
mgv1a013409m	617	2	0.000443978	-0.658304
mgv1a005101m	1062	40	0.00659623	-0.655255
mgv1a019777m	1421	39	0.00525001	-0.654021
mgv1a009848m	815	6	0.00118238	-0.652799
mgv1a003145m	1287	9	0.00131843	-0.651581
mgv1a002984m	1690	70	0.00732152	-0.650421
mgv1a013425m	480	4	0.00129571	-0.650413
mgv1a013062m	424	4	0.00152424	-0.647807
mgv1a003637m	1287	10	0.00132723	-0.647699
mgv1a002092m	1984	13	0.00112465	-0.644763
mgv1a008208m	847	40	0.00838162	-0.644026
mgv1a003979m	1208	48	0.00865512	-0.643987
mgv1a021213m	1017	3	0.000438008	-0.640366
mgv1a023436m	352	1	0.000340002	-0.636701
mgv1a013225m	360	1	0.000332447	-0.636701
mgv1a005364m	893	2	0.000313018	-0.635994
mgv1a007445m	692	5	0.00119028	-0.63522
mgv1a026661m	679	20	0.00551983	-0.635188
mgv1a003756m	1382	27	0.00342013	-0.634784
mgv1a011888m	593	7	0.0020803	-0.633516
mgv1a014959m	399	14	0.00659662	-0.63214
mgv1a010103m	794	12	0.00257532	-0.630237
mgv1a010150m	791	12	0.00258509	-0.630237
mgv1a021946m	280	10	0.00608715	-0.62983
mgv1a004406m	1214	14	0.00198068	-0.628496
mgv1a016770m	209	5	0.0040589	-0.627424
mgv1a001221m	2124	66	0.00559148	-0.623918
mgv1a005070m	1055	44	0.0074026	-0.622931
mgv1a010646m	540	5	0.00148629	-0.621819
mgv1a012212m	718	4	0.000882761	-0.620212
mgv1a008981m	871	72	0.0157215	-0.617154
mgv1a012104m	583	3	0.000777439	-0.616333
mgv1a011526m	683	34	0.00963134	-0.615381
mgv1a012729m	635	8	0.00211371	-0.612622
mgv1a007548m	1083	31	0.00506889	-0.61255
mgv1a006187m	764	32	0.00749577	-0.610565
mgv11b008897m	741	4	0.000852656	-0.607684
mgv1a007313m	921	35	0.00719068	-0.607366
mgv1a002233m	1835	31	0.00302793	-0.604784
mgv1a009295m	772	17	0.00392802	-0.601805
mgv1a003980m	1111	33	0.00563175	-0.598908
mgv1a003609m	1262	6	0.000786733	-0.597109
mgv1a003301m	1084	8	0.00133501	-0.596193
mgv1a016370m	337	3	0.00138104	-0.595068
mgv1a013015m	522	23	0.00780962	-0.592117
mgv1a006685m	712	9	0.00218182	-0.589097
mgv1a004292m	890	4	0.000736353	-0.584103
mgv1a010159m	736	3	0.000638046	-0.582135
mgv1a002738m	1469	5	0.000564663	-0.582013
mgv1a003433m	1568	73	0.0085092	-0.581787
mgv1a020946m	626	10	0.00311882	-0.579983
mgv1a016232m	378	2	0.000778307	-0.57743
mgv1a019019m	193	4	0.00341516	-0.57452
mgv1a000108m	4441	19	0.000760037	-0.572765
mgv1a008906m	880	38	0.00779221	-0.571185
mgv1a008776m	901	4	0.000725182	-0.570469
mgv1a008772m	681	25	0.00778436	-0.56942
mgv1a014415m	328	13	0.00724896	-0.568594
mgv1a000801m	2083	94	0.00823425	-0.566108
mgv1a014394m	573	21	0.00660883	-0.565155
mgv1a004927m	841	4	0.000817982	-0.564311
mgv1a002417m	1566	17	0.00194828	-0.561891
mgv1a002396m	1371	38	0.00501861	-0.56175
mgv1a020937m	547	18	0.00586671	-0.559659
mgv1a002925m	1786	8	0.000771149	-0.55883
mgv1a007595m	955	51	0.00980605	-0.558377
mgv1a007920m	1030	4	0.000639108	-0.558033
mgv1a020075m	275	16	0.0105608	-0.553056
mgv1a009590m	821	21	0.00463463	-0.552655
mgv1a013159m	524	23	0.00797233	-0.552104
mgv1a005715m	1131	43	0.00698503	-0.550972
mgv1a026231m	528	20	0.00723941	-0.548898
mgv1a019971m	1535	86	0.0110469	-0.548653
mgv1a015529m	346	4	0.00189363	-0.548236
mgv1a000978m	1845	10	0.000949213	-0.547929
mgv1a008072m	860	4	0.000770318	-0.547374
mgv1a010523m	889	4	0.00074519	-0.547374
mgv1a000501m	2766	22	0.00143533	-0.542269
mgv1a002762m	1731	3	0.00027896	-0.541183
mgv1a006486m	1015	28	0.00505417	-0.539869
mgv1a008678m	922	50	0.0105536	-0.539118
mgv1a000595m	2457	43	0.00320024	-0.538952
mgv1a001104m	2248	18	0.00145265	-0.538719
mgv1a012877m	611	38	0.0114646	-0.536771
mgv1a003480m	1391	8	0.00100087	-0.535918
mgv1a005700m	1108	5	0.000768189	-0.534922
mgv1a000251m	2928	25	0.00155041	-0.533419
mgv1a008372m	979	25	0.00463898	-0.532268
mgv1a014037m	515	2	0.000644994	-0.531908
mgv1a014296m	438	3	0.00112261	-0.531127
mgv1a001978m	1989	26	0.00240421	-0.525466
mgv1a019927m	451	3	0.00137131	-0.523489
mgv1a008324m	795	26	0.00602033	-0.52308
mgv1a000152m	4476	17	0.000692255	-0.522601
mgv1a000859m	2107	16	0.00136897	-0.522574
mgv1a000650m	2593	6	0.000398425	-0.520381
mgv1a012095m	751	17	0.00413146	-0.519134
mgv1a009005m	917	23	0.00461429	-0.517949
mgv1a008964m	917	23	0.00461429	-0.517949
mgv1a014384m	573	22	0.00705764	-0.517525
mgv1a006939m	1027	29	0.00521966	-0.517226
mgv1a026892m	677	9	0.00250608	-0.516113
mgv1a005115m	1298	56	0.00798981	-0.510918
mgv1a007528m	910	20	0.00400528	-0.510427
mgv1a011178m	855	12	0.00251842	-0.509811
mgv1a009946m	744	19	0.00469256	-0.509307
mgv11b022653m	434	30	0.0142528	-0.507583
mgv1a006745m	1051	10	0.00169783	-0.505297
mgv1a006444m	1116	16	0.00277058	-0.50412
mgv1a001447m	2310	11	0.000861868	-0.503412
mgv1a015787m	355	12	0.0069594	-0.502935
mgv1a012403m	395	3	0.00131597	-0.502458
mgv1a017558m	197	3	0.00257329	-0.502312
mgv1a001639m	1700	10	0.00105118	-0.501954
mgv1a008159m	870	34	0.00735251	-0.501044
mgv1a006863m	802	1	0.00016841	-0.49546
mgv1a008039m	902	27	0.00557345	-0.493708
mgv1a007743m	932	27	0.00539405	-0.493708
mgv1a027137m	823	3	0.000635122	-0.493512
mgv1a026634m	622	2	0.000512869	-0.493493
mgv1a001121m	2568	10	0.000705071	-0.493317
mgv1a010761m	700	26	0.0074652	-0.49315
mgv1a004026m	1329	12	0.00163193	-0.492504
mgv1a007637m	821	20	0.00447111	-0.49173
mgv1a004177m	1476	28	0.00353951	-0.489668
mgv1a006385m	1156	44	0.00708331	-0.489605
mgv1a004126m	1166	23	0.0048524	-0.489409
mgv1a004058m	1340	36	0.00529961	-0.488223
mgv1a004114m	1352	12	0.00162557	-0.482821
mgv1a004863m	1400	68	0.0091794	-0.481729
mgv1a022178m	2063	10	0.000882068	-0.481642
mgv1a006132m	1064	56	0.0104556	-0.480102
mgv1a021784m	2701	106	0.00744011	-0.480012
mgv1a003745m	1272	27	0.00397257	-0.47949
mgv1a015570m	376	4	0.00181507	-0.478879
mgv1a025697m	1399	1	9.99016e-05	-0.478325
mgv1a012870m	572	1	0.00024434	-0.478325
mgv1a008446m	824	1	0.000169615	-0.478325
mgv1a015175m	286	3	0.00187022	-0.477861
mgv1a008052m	836	4	0.000817125	-0.477228
mgv1a012051m	751	4	0.000920273	-0.474536
mgv1a015482m	247	5	0.0038773	-0.471474
mgv1a004209m	1197	57	0.00902267	-0.469997
mgv1a000591m	2496	63	0.00474525	-0.469539
mgv1a001749m	1619	4	0.000423943	-0.468971
mgv1a011276m	610	29	0.0088663	-0.467697
mgv1a004260m	1332	11	0.00151829	-0.465987
mgv1a004198m	1341	11	0.0015081	-0.465987
mgv1a015459m	271	4	0.00264976	-0.46541
mgv1a012587m	656	37	0.0106835	-0.458236
mgv1a000794m	2691	14	0.000967326	-0.457519
mgv1a002295m	1700	3	0.000297173	-0.456114
mgv1a006749m	1104	11	0.00182571	-0.451905
mgv1a012680m	709	4	0.000987602	-0.451441
mgv1a005695m	969	9	0.00170556	-0.45043
mgv1a007296m	864	28	0.00613563	-0.448763
mgv1a002878m	1798	8	0.000814244	-0.446688
mgv1a024971m	488	3	0.00105251	-0.446347
mgv1a014984m	323	7	0.00406758	-0.445503
mgv1a015762m	368	20	0.0106622	-0.445268
mgv1a015556m	367	2	0.000953391	-0.440165
mgv1a017968m	1387	69	0.00953447	-0.439797
mgv1a013073m	587	18	0.0057774	-0.439722
mgv1a005088m	1195	22	0.0034847	-0.438163
mgv1a001296m	2138	16	0.0014071	-0.437857
mgv1a002157m	1999	7	0.000639383	-0.4378
mgv1a003098m	1670	7	0.000765346	-0.4378
mgv1a000319m	3479	86	0.00470765	-0.436621
mgv1a012977m	617	28	0.00863378	-0.435004
mgv1a008328m	828	48	0.0119612	-0.434914
mgv1a009593m	691	43	0.0117983	-0.434744
mgv1a003439m	997	8	0.00146283	-0.43431
mgv1a010708m	661	30	0.00920718	-0.434074
mgv1a007681m	1107	19	0.0032466	-0.432165
mgv1a007936m	784	35	0.00861499	-0.428931
mgv1a004077m	1441	31	0.00407365	-0.427398
mgv1a004609m	1287	49	0.00731011	-0.426775
mgv1a009756m	778	5	0.00127621	-0.426555
mgv1a008030m	884	4	0.000795528	-0.426036
mgv1a003327m	1471	10	0.00126746	-0.424163
mgv1a001028m	2624	77	0.00565841	-0.423208
mgv1a014842m	322	3	0.00182392	-0.421447
mgv1a002611m	1538	36	0.00449139	-0.41972
mgv1a003012m	1672	9	0.00100183	-0.419181
mgv1a023005m	615	15	0.00465978	-0.41647
mgv1a007140m	866	54	0.0120259	-0.415745
mgv1a013328m	659	20	0.00578455	-0.414253
mgv1a005263m	1366	7	0.000945903	-0.414084
mgv1a002117m	1717	24	0.00267315	-0.413715
mgv1a012213m	632	11	0.00327181	-0.41193
mgv1a012966m	580	4	0.00130677	-0.410348
mgv1a006722m	1006	65	0.0123945	-0.409645
mgv1a012028m	598	4	0.00118794	-0.407871
mgv1a008925m	792	5	0.0011488	-0.407322
mgv1a011025m	822	34	0.00796578	-0.407172
mgv1a019428m	925	3	0.000575598	-0.40551
mgv1a009605m	762	3	0.000691475	-0.405395
mgv1a002809m	1596	35	0.00422746	-0.405268
mgv1a008287m	893	37	0.00792382	-0.40486
mgv1a007650m	923	2	0.000362314	-0.402746
mgv1a008784m	1043	88	0.016403	-0.399979
mgv1a023683m	2338	93	0.00767194	-0.398774
mgv1a001168m	1474	5	0.000663455	-0.398657
mgv1a013626m	401	4	0.0017845	-0.39466
mgv1a007850m	919	22	0.00456312	-0.394392
mgv1a024085m	1328	63	0.0100644	-0.394198
mgv1a019859m	1416	1	0.000114632	-0.393664
mgv1a008655m	731	25	0.00693394	-0.393649
mgv1a005177m	1087	8	0.0013674	-0.391475
mgv1a014515m	511	3	0.0010407	-0.390307
mgv1a013937m	513	3	0.00103664	-0.390307
mgv1a014091m	517	3	0.00102862	-0.390307
mgv11b015928m	352	10	0.00537807	-0.387341
mgv1a016236m	389	9	0.00436892	-0.385003
mgv1a008009m	939	33	0.00682142	-0.383249
mgv1a013013m	414	23	0.0107371	-0.382213
mgv1a011464m	581	34	0.0127845	-0.380875
mgv1a005984m	1273	82	0.013409	-0.376837
mgv1a007263m	669	13	0.00375947	-0.374543
mgv1a010470m	660	6	0.00169938	-0.371467
mgv1a011492m	641	31	0.0094247	-0.369499
mgv1a007375m	1129	8	0.00134192	-0.368533
mgv1a004835m	1119	6	0.000995207	-0.366923
mgv1a001105m	2511	66	0.00515858	-0.366214
mgv1a012075m	752	5	0.00123686	-0.363269
mgv1a016480m	268	9	0.0065927	-0.363155
mgv1a001513m	2079	49	0.00462278	-0.362462
mgv1a012491m	538	18	0.00654623	-0.362293
mgv1a010817m	692	31	0.00910056	-0.362027
mgv1a012768m	621	30	0.0094424	-0.359733
mgv1a010754m	611	49	0.0158865	-0.35958
mgv1a004174m	1217	43	0.00693012	-0.359481
mgv1a011569m	609	8	0.00266616	-0.357692
mgv1a015774m	361	6	0.00333954	-0.357535
mgv1a011013m	703	10	0.00387624	-0.357226
mgv1a014835m	411	14	0.00710275	-0.3568
mgv1a019244m	1539	46	0.00582179	-0.35614
mgv1a000260m	2993	69	0.0045025	-0.355561
mgv1a013134m	522	27	0.0104056	-0.355349
mgv1a011597m	585	24	0.00808421	-0.354619
mgv1a010608m	506	10	0.00390526	-0.354422
mgv1a003082m	1154	41	0.00692284	-0.352245
mgv1a014893m	364	2	0.000973762	-0.351961
mgv1a016384m	311	5	0.00321543	-0.350863
mgv1a006615m	965	9	0.00188194	-0.350542
mgv1a013716m	576	38	0.0129656	-0.350357
mgv1a002993m	1495	95	0.0125557	-0.350161
mgv1a000305m	3455	13	0.000728544	-0.348252
mgv1a005652m	1111	6	0.00102086	-0.347516
mgv1a014277m	507	3	0.00108883	-0.345028
mgv1a003053m	977	22	0.00444924	-0.34348
mgv1a005036m	1153	14	0.0023389	-0.342953
mgv1a002750m	1712	59	0.00675522	-0.341705
mgv1a011379m	657	27	0.0080047	-0.341151
mgv1a007193m	906	5	0.00110888	-0.340801
mgv1a005979m	1169	46	0.0077772	-0.337762
mgv1a004811m	1391	17	0.00238932	-0.336553
mgv1a012962m	584	4	0.00127677	-0.335967
mgv1a013021m	584	4	0.00127677	-0.335967
mgv1a013915m	567	10	0.00341148	-0.334352
mgv1a003029m	1624	12	0.0014385	-0.329456
mgv1a012123m	472	3	0.00116962	-0.327801
mgv1a009336m	759	30	0.00877174	-0.327316
mgv1a007432m	837	7	0.00163753	-0.325322
mgv1a008936m	977	58	0.0118133	-0.321047
mgv1a004784m	1021	7	0.00132028	-0.319219
mgv1a011792m	733	29	0.00783756	-0.319101
mgv1a003882m	1460	9	0.00119755	-0.316645
mgv1a011661m	555	6	0.00211362	-0.316375
mgv1a012043m	700	26	0.00729406	-0.31616
mgv1a012117m	594	18	0.00597637	-0.314874
mgv1a020054m	219	18	0.0177062	-0.312648
mgv1a012350m	598	3	0.000940793	-0.31246
mgv1a011506m	599	1	0.000276435	-0.312458
mgv1a005842m	1026	4	0.000768427	-0.309134
mgv1a010612m	652	6	0.00180669	-0.307066
mgv1a007592m	668	9	0.00283472	-0.307024
mgv1a014208m	452	2	0.000827685	-0.30607
mgv1a015999m	258	2	0.0016029	-0.30516
mgv1a003087m	1565	3	0.000354342	-0.303905
mgv1a013629m	547	6	0.00211688	-0.302276
mgv1a007176m	985	3	0.00056365	-0.301902
mgv1a006129m	1314	30	0.00455664	-0.297906
mgv1a013342m	569	4	0.00133745	-0.296883
mgv1a002668m	1574	81	0.0108563	-0.295515
mgv1a003206m	1498	46	0.00654144	-0.293499
mgv1a011056m	712	43	0.0121046	-0.29331
mgv1a005616m	1046	6	0.00110191	-0.292669
mgv1a000387m	2511	8	0.000635246	-0.291706
mgv1a001277m	2397	10	0.000820966	-0.291243
mgv1a006283m	1261	5	0.000764204	-0.290355
mgv1a008652m	632	1	0.0002709	-0.28956
mgv1a004441m	1480	1	0.000115682	-0.28956
mgv1a012666m	601	1	0.000284873	-0.28956
mgv1a015626m	436	1	0.000392681	-0.28956
mgv1a025277m	850	9	0.00207999	-0.289302
mgv1a001503m	1888	75	0.0079284	-0.288608
mgv1a000611m	2309	16	0.00136535	-0.288485
mgv1a007832m	898	3	0.000682428	-0.285802
mgv1a015653m	417	3	0.0013574	-0.284693
mgv1a006219m	1260	2	0.000291726	-0.284611
mgv1a001627m	1736	63	0.00776345	-0.284334
mgv1a006757m	935	7	0.00145149	-0.283215
mgv1a007087m	811	6	0.00142761	-0.282769
mgv1a005790m	986	12	0.00248425	-0.280355
mgv1a005246m	1020	3	0.000556994	-0.278227
mgv1a010640m	715	2	0.000517023	-0.276245
mgv1a010553m	713	4	0.00113714	-0.276147
mgv1a001815m	1166	9	0.00184985	-0.274677
mgv1a010865m	779	21	0.0054057	-0.273346
mgv1a000764m	2005	11	0.00108009	-0.273072
mgv1a004513m	1357	3	0.000420214	-0.271761
mgv1a004376m	1027	41	0.0082038	-0.271181
mgv1a002511m	1477	22	0.003261	-0.2702
mgv1a020358m	1212	19	0.00338601	-0.267181
mgv1a014224m	590	8	0.00268036	-0.266825
mgv1a025411m	1268	66	0.0114796	-0.266692
mgv1a016461m	317	4	0.00243813	-0.266682
mgv1a001278m	1955	2	0.00018866	-0.265472
mgv1a022220m	347	1	0.000510734	-0.264871
mgv1a022072m	1487	12	0.00159696	-0.263911
mgv1a007425m	972	13	0.00284505	-0.261809
mgv1a000333m	3275	61	0.00374621	-0.261553
mgv1a014845m	329	8	0.00486414	-0.260207
mgv1a000141m	4530	24	0.00106982	-0.256972
mgv1a025892m	317	8	0.00501293	-0.255048
mgv1a011985m	533	7	0.0027064	-0.253708
mgv1a000936m	2635	10	0.000757952	-0.253522
mgv1a015722m	344	15	0.00870583	-0.249504
mgv1a014323m	434	25	0.0115716	-0.248331
mgv1a010922m	729	42	0.0133413	-0.24634
mgv1a005139m	1417	47	0.00675436	-0.245231
mgv1a002844m	1053	12	0.00235986	-0.241287
mgv1a009947m	548	5	0.00181656	-0.241154
mgv1a008028m	952	40	0.0084893	-0.240899
mgv1a005337m	1191	40	0.00684671	-0.239187
mgv1a024496m	1111	44	0.0080108	-0.238962
mgv1a009352m	798	24	0.006418	-0.238176
mgv1a021611m	508	3	0.00114451	-0.237275
mgv1a007531m	751	28	0.00758923	-0.236801
mgv1a015573m	431	2	0.000882027	-0.234414
mgv1a004400m	1253	13	0.00207917	-0.233704
mgv1a001650m	2072	36	0.00354634	-0.23351
mgv1a003263m	1264	2	0.000310705	-0.231627
mgv1a016676m	220	5	0.00454545	-0.231324
mgv1a003950m	923	5	0.00107358	-0.231112
mgv1a011380m	729	27	0.00755369	-0.230094
mgv1a012615m	728	40	0.0112434	-0.22739
mgv1a003468m	1735	21	0.00246578	-0.227195
mgv1a012286m	514	3	0.00121341	-0.227051
mgv1a010537m	766	23	0.00686251	-0.226181
mgv1a024394m	792	8	0.00201364	-0.225117
mgv1a003911m	1384	19	0.00279676	-0.224358
mgv1a002876m	1347	9	0.00141651	-0.223068
mgv1a005250m	1167	37	0.00644009	-0.223003
mgv1a012809m	686	35	0.0104475	-0.222958
mgv1a021982m	221	6	0.00542923	-0.222439
mgv1a004929m	1202	10	0.00168192	-0.222088
mgv1a023715m	2471	113	0.00940865	-0.220693
mgv1a000190m	3886	15	0.000785849	-0.21887
mgv1a003830m	1589	62	0.00802381	-0.217394
mgv1a007393m	1113	36	0.00658627	-0.214868
mgv1a000198m	2764	62	0.00457834	-0.214716
mgv1a002683m	1272	3	0.000459446	-0.211779
mgv1a000977m	2429	41	0.00344324	-0.211315
mgv1a007797m	762	8	0.00225886	-0.209512
mgv1a007865m	759	8	0.00226779	-0.209512
mgv1a000710m	2651	8	0.000611032	-0.207942
mgv1a006803m	969	33	0.00843058	-0.206767
mgv1a003065m	1403	58	0.00846239	-0.204602
mgv1a008207m	985	65	0.0136265	-0.204444
mgv1a003509m	1407	73	0.0106305	-0.203785
mgv1a005333m	1382	26	0.00387077	-0.20265
mgv1a021916m	1375	69	0.0102843	-0.202524
mgv1a010873m	673	7	0.00210578	-0.201824
mgv1a006848m	898	7	0.00162398	-0.201161
mgv1a004578m	1070	4	0.000746488	-0.20095
mgv1a003253m	1439	8	0.00113005	-0.198306
mgv1a008109m	669	7	0.00210335	-0.198274
mgv1a004196m	1349	30	0.00458864	-0.196607
mgv1a015021m	455	2	0.000857005	-0.195371
mgv1a000538m	2791	19	0.00138967	-0.193925
mgv1a005536m	870	20	0.00570115	-0.192322
mgv1a002882m	1612	6	0.000754301	-0.191835
mgv1a010621m	458	7	0.00349111	-0.189516
mgv1a013971m	456	18	0.00806989	-0.188249
mgv1a013360m	533	3	0.00118005	-0.187386
mgv1a003654m	1168	4	0.000682708	-0.18659
mgv1a013599m	454	18	0.00879081	-0.185799
mgv1a006105m	993	42	0.00967247	-0.18529
mgv1a013720m	501	12	0.00511441	-0.184783
mgv1a010265m	745	3	0.000796653	-0.183741
mgv1a012150m	528	29	0.0120763	-0.183577
mgv1a026312m	1336	86	0.0147598	-0.181955
mgv1a003971m	1222	32	0.00552924	-0.181426
mgv1a006525m	726	45	0.0132368	-0.180245
mgv1a005179m	1325	11	0.00170774	-0.179898
mgv1a004358m	1238	38	0.00637737	-0.178564
mgv1a002975m	1725	62	0.00741878	-0.178307
mgv1a013103m	418	13	0.00681304	-0.177411
mgv1a012506m	467	15	0.00658528	-0.175262
mgv1a012493m	470	15	0.00654324	-0.175262
mgv1a003080m	1473	33	0.00465685	-0.175125
mgv1a002779m	1317	61	0.00982195	-0.174916
mgv1a014022m	398	29	0.0151509	-0.172126
mgv1a007767m	860	3	0.00072159	-0.171
mgv1a012954m	557	3	0.00109263	-0.170559
mgv1a021721m	504	6	0.00288171	-0.168464
mgv1a002845m	1269	13	0.00212067	-0.167735
mgv1a015373m	339	5	0.00300963	-0.167311
mgv1a011745m	716	29	0.0083681	-0.166238
mgv1a003004m	1336	11	0.00173408	-0.164877
mgv1a005887m	911	6	0.00147244	-0.16375
mgv1a016200m	295	3	0.00230823	-0.163565
mgv1a015764m	337	3	0.00202055	-0.163565
mgv1a025268m	959	21	0.00455795	-0.163257
mgv1a000692m	2020	11	0.00115907	-0.162478
mgv1a007565m	1154	90	0.0163252	-0.161842
mgv1a012873m	482	7	0.00298952	-0.161506
mgv1a012650m	496	15	0.00646484	-0.158388
mgv1a013887m	490	5	0.00213078	-0.156718
mgv1a015707m	369	9	0.00500827	-0.155612
mgv1a008011m	812	31	0.00813009	-0.153915
mgv1a002228m	1639	3	0.000371364	-0.153215
mgv1a003760m	1092	11	0.00219742	-0.152216
mgv1a000012m	6221	152	0.00509314	-0.150469
mgv1a004447m	979	40	0.00856562	-0.150444
mgv1a004852m	1371	49	0.00743793	-0.149515
mgv1a005042m	983	11	0.00239623	-0.145692
mgv1a023984m	704	36	0.0118258	-0.145548
mgv1a027073m	966	31	0.00698833	-0.145021
mgv1a008707m	703	3	0.000877515	-0.144971
mgv1a002246m	1641	7	0.000884055	-0.144905
mgv1a006774m	1132	8	0.001468	-0.143705
mgv1a001913m	1769	10	0.00123575	-0.143677
mgv1a013549m	504	1	0.00040899	-0.143647
mgv1a004710m	1168	69	0.0123271	-0.143341
mgv1a006518m	1168	69	0.0123271	-0.143341
mgv1a004147m	1482	39	0.00552967	-0.142759
mgv1a008820m	697	2	0.0005785	-0.142385
mgv1a011264m	682	6	0.00198354	-0.142242
mgv1a003588m	1252	6	0.00098388	-0.141687
mgv1a008975m	1010	11	0.00227218	-0.141641
mgv1a012292m	466	3	0.00139821	-0.140949
mgv1a008431m	762	22	0.00605821	-0.139633
mgv1a008600m	968	4	0.000843217	-0.138701
mgv1a011280m	815	20	0.00515149	-0.136769
mgv1a001183m	2256	9	0.000825504	-0.135619
mgv1a000047m	4951	34	0.00144575	-0.135198
mgv1a010451m	727	15	0.00432648	-0.134646
mgv1a019731m	906	20	0.00467805	-0.134375
mgv1a005908m	1050	19	0.00380287	-0.132524
mgv1a017762m	1194	51	0.00895005	-0.127563
mgv1a016575m	305	3	0.00223784	-0.126643
mgv1a009614m	812	39	0.010144	-0.126291
mgv1a004455m	1368	13	0.00199785	-0.124237
mgv1a006901m	955	35	0.00768206	-0.123183
mgv1a013835m	495	14	0.00595473	-0.121568
mgv1a012111m	551	3	0.00111603	-0.11765
mgv1a009125m	954	2	0.000429249	-0.117286
mgv1a005353m	921	35	0.00798046	-0.117246
mgv1a008441m	1052	57	0.0114978	-0.113552
mgv1a004091m	841	41	0.0103501	-0.10983
mgv1a000991m	1690	3	0.000365404	-0.109639
mgv1a022157m	336	1	0.000598982	-0.109184
mgv1a003906m	1589	50	0.00668599	-0.108454
mgv1a019265m	2099	12	0.00120885	-0.10638
mgv1a002087m	1380	18	0.00325128	-0.104748
mgv1a010658m	753	30	0.00846555	-0.104391
mgv1a003957m	1163	7	0.00136363	-0.100598
mgv1a015207m	308	8	0.00582229	-0.100141
mgv1a007994m	844	8	0.00200287	-0.0998102
mgv1a008041m	838	8	0.00201722	-0.0998102
mgv1a026889m	539	36	0.0147545	-0.0995495
mgv1a002912m	1335	8	0.00134414	-0.0983778
mgv1a008548m	892	7	0.00164376	-0.0978887
mgv1a000296m	3507	54	0.00325601	-0.097801
mgv1a008016m	892	2	0.000464569	-0.0977648
mgv1a008031m	891	2	0.00046509	-0.0977648
mgv1a002240m	1722	2	0.000240648	-0.0977648
mgv1a009164m	796	17	0.00453877	-0.0973477
mgv1a009134m	675	29	0.00915289	-0.0957574
mgv1a007672m	982	7	0.00149443	-0.0956825
mgv1a003629m	1264	10	0.00167792	-0.0945562
mgv1a000986m	1814	103	0.0120355	-0.0923196
mgv1a007883m	1060	37	0.00739035	-0.0913794
mgv1a011728m	685	31	0.009581	-0.0902676
mgv1a005052m	1147	42	0.00782462	-0.0886967
mgv1a014131m	478	25	0.0112617	-0.0877383
mgv1a000907m	2722	58	0.00455845	-0.0865472
mgv1a005190m	1019	6	0.00124881	-0.0840553
mgv1a006995m	986	26	0.00591044	-0.0836278
mgv1a001480m	1791	95	0.0113698	-0.0816222
mgv1a006170m	1254	5	0.000845373	-0.0807256
mgv1a010058m	567	1	0.000367098	-0.0790439
mgv1a002796m	1756	57	0.00696225	-0.077791
mgv1a005345m	1162	11	0.00202186	-0.0767723
mgv1a022696m	966	32	0.00710169	-0.0763772
mgv1a015193m	383	10	0.00567379	-0.0761773
mgv1a007877m	1160	56	0.0103743	-0.0712808
mgv1a019992m	1281	9	0.00167817	-0.070594
mgv1a008026m	910	3	0.000698812	-0.0691559
mgv1a006375m	903	11	0.00258805	-0.0686914
mgv1a025006m	723	40	0.0124686	-0.0680748
mgv1a000844m	1942	92	0.0106873	-0.0672717
mgv1a026953m	1092	48	0.00980871	-0.0671424
mgv1a005611m	1234	41	0.00714669	-0.0668576
mgv1a015448m	283	1	0.000792788	-0.065219
mgv1a015204m	370	2	0.00114265	-0.0642997
mgv1a004652m	1260	15	0.00255843	-0.0626383
mgv1a009046m	615	23	0.00852856	-0.0624017
mgv1a010643m	699	4	0.00122067	-0.0623804
mgv1a012717m	527	6	0.00241751	-0.0612454
mgv1a006706m	937	4	0.000927842	-0.0600307
mgv1a003190m	1696	79	0.00997189	-0.057708
mgv1a014673m	488	15	0.00661723	-0.0574945
mgv1a007524m	728	7	0.00221365	-0.0574555
mgv1a009858m	631	12	0.00429031	-0.0564152
mgv1a026013m	574	43	0.0169483	-0.0552123
mgv1a011875m	594	8	0.0030698	-0.0542767
mgv1a026887m	1555	54	0.0074431	-0.0527112
mgv1a007042m	1164	25	0.00463653	-0.0525902
mgv1a015450m	324	19	0.0131389	-0.0491334
mgv1a000106m	4767	71	0.00319731	-0.0480797
mgv1a000084m	5176	128	0.00535423	-0.0474193
mgv1a000066m	4041	22	0.00116806	-0.0457638
mgv1a015586m	307	3	0.00207919	-0.0455511
mgv1a000487m	2708	81	0.00642685	-0.0452493
mgv1a001538m	2086	4	0.000412721	-0.0428387
mgv1a021151m	532	7	0.00312985	-0.0385614
mgv1a007854m	1131	3	0.000571531	-0.036825
mgv1a003837m	1497	97	0.014071	-0.0366945
mgv1a007804m	859	22	0.00551532	-0.0341575
mgv1a024182m	886	14	0.00343254	-0.0302546
mgv1a013780m	371	6	0.00419656	-0.0290302
mgv1a008450m	921	3	0.000755867	-0.0282495
mgv1a002208m	1746	91	0.0112628	-0.0256119
mgv1a015436m	357	10	0.00645461	-0.0250403
mgv1a009261m	963	3	0.000675591	-0.0238931
mgv1a026883m	1401	11	0.00181055	-0.0232961
mgv1a000500m	2769	18	0.0014163	-0.0222808
mgv1a003647m	1581	62	0.00855371	-0.0209018
mgv1a016111m	184	2	0.00240018	-0.0194789
mgv1a001087m	1739	15	0.00188185	-0.0176331
mgv1a010790m	629	28	0.00964012	-0.0169621
mgv1a007679m	877	5	0.0012328	-0.0158767
mgv1a004123m	1288	8	0.00135585	-0.0141614
mgv1a004005m	1306	8	0.00133716	-0.0141614
mgv1a005640m	891	11	0.00267465	-0.0137254
mgv1a022800m	1650	71	0.00940601	-0.013571
mgv1a005831m	852	8	0.0020505	-0.0130908
mgv1a012203m	564	6	0.00232318	-0.0122023
mgv1a005540m	877	1	0.000254737	-0.011597
mgv1a013265m	383	20	0.0116161	-0.0114981
mgv1a005716m	1310	36	0.00601085	-0.0109435
mgv1a006386m	1074	3	0.000639761	-0.00787846
mgv1a009673m	743	7	0.00218376	-0.00718541
mgv1a011893m	554	40	0.015946	-0.00680367
mgv1a008507m	846	2	0.000561592	-0.00363551
mgv1a001723m	1853	13	0.00153905	-0.000992705
mgv1a006273m	1285	15	0.00256086	-0.000917103
mgv1a001483m	2157	134	0.0136351	0.000607332
mgv1a007053m	806	40	0.010811	0.00226659
mgv1a002920m	1314	34	0.00564253	0.00568069
mgv1a018471m	1707	53	0.00682682	0.00669238
mgv1a000407m	3167	86	0.00597245	0.00785552
mgv1a008770m	720	61	0.019738	0.00881937
mgv1a009530m	978	18	0.00405068	0.0090682
mgv1a021017m	198	3	0.00331562	0.0105258
mgv1a000151m	4374	37	0.00186238	0.0109366
mgv1a005316m	1386	49	0.00778827	0.0132192
mgv1a010374m	855	5	0.00129055	0.0134556
mgv1a011919m	688	35	0.0121613	0.0155179
mgv1a015270m	389	3	0.00187293	0.0158451
mgv1a013771m	499	7	0.0032795	0.0162941
mgv1a008022m	911	3	0.000728728	0.0170594
mgv1a000568m	2805	14	0.00110166	0.0174467
mgv1a002667m	1276	34	0.00592857	0.0181141
mgv1a003520m	666	2	0.000677821	0.0196619
mgv1a008584m	1056	7	0.00146578	0.0199229
mgv1a004107m	1237	14	0.00248087	0.0206394
mgv1a000897m	2672	11	0.000903307	0.0226603
mgv1a000600m	2349	7	0.000654603	0.0234562
mgv1a011241m	598	2	0.000744387	0.0249403
mgv1a011358m	580	7	0.00267476	0.0258519
mgv1a022515m	397	4	0.00239618	0.0276462
mgv1a003633m	1174	39	0.007353	0.029065
mgv1a009314m	799	44	0.012192	0.0301134
mgv1a010409m	724	13	0.00398053	0.0301808
mgv1a004014m	1540	49	0.00704666	0.031405
mgv1a010043m	862	18	0.00459291	0.0320357
mgv1a016482m	336	2	0.00133107	0.0333065
mgv1a026137m	686	8	0.00271667	0.0373525
mgv1a000875m	2687	84	0.00693481	0.0380327
mgv1a015014m	477	2	0.00103158	0.0393276
mgv1a005806m	898	20	0.00499014	0.0395372
mgv1a001315m	2097	20	0.00212043	0.0413624
mgv1a007332m	906	2	0.00053065	0.0424586
mgv1a017229m	211	16	0.0176698	0.0431435
mgv1a000652m	2912	70	0.0053414	0.0436332
mgv1a002449m	1577	18	0.00254045	0.0442678
mgv1a026225m	583	26	0.00984496	0.045398
mgv1a002091m	1753	5	0.000638219	0.0468747
mgv1a012395m	517	10	0.00431858	0.0491411
mgv1a004121m	1111	72	0.0151112	0.0511413
mgv1a003457m	1683	71	0.00939431	0.0513073
mgv1a001435m	2284	109	0.0106309	0.0533077
mgv1a009305m	710	59	0.0185234	0.0543919
mgv1a000293m	2516	23	0.00202522	0.0563279
mgv1a001402m	2123	93	0.00976888	0.0569354
mgv1a001397m	2126	93	0.0097551	0.0569354
mgv1a024492m	686	11	0.00473523	0.0573844
mgv1a004705m	1062	55	0.0122334	0.0583658
mgv1a003522m	1383	62	0.0104753	0.058413
mgv1a011044m	752	6	0.00179442	0.0623118
mgv1a011100m	726	8	0.00247472	0.0629225
mgv1a010118m	813	2	0.000555103	0.0634664
mgv1a009384m	903	38	0.00941036	0.0638033
mgv1a005349m	1426	56	0.0087084	0.0638168
mgv1a005269m	1310	56	0.00955559	0.0640127
mgv1a009187m	740	47	0.0158188	0.0668403
mgv1a000766m	2870	77	0.00600224	0.0679307
mgv1a022679m	568	22	0.00868102	0.0679997
mgv1a010756m	594	19	0.00717282	0.0684606
mgv1a009265m	788	4	0.00122836	0.0699585
mgv1a008486m	735	5	0.00152664	0.0731075
mgv1a001141m	2393	75	0.00702258	0.073375
mgv1a012952m	565	17	0.00752133	0.0737799
mgv1a012059m	453	15	0.00779161	0.0739148
mgv1a009194m	832	27	0.00728713	0.0757919
mgv1a007785m	956	51	0.0118731	0.0761304
mgv1a000726m	2630	3	0.000259862	0.0774097
mgv1a000738m	2625	3	0.000260357	0.0774097
mgv1a000725m	2633	3	0.000259566	0.0774097
mgv1a000825m	2548	7	0.000616475	0.0797159
mgv1a006333m	968	33	0.00811448	0.083315
mgv1a014029m	457	3	0.00150008	0.0838761
mgv1a004428m	1182	45	0.00878949	0.0848388
mgv1a024674m	609	33	0.0139969	0.0848605
mgv1a002792m	1473	43	0.00657538	0.0894251
mgv1a002780m	1473	43	0.00657538	0.0894251
mgv1a019208m	1088	44	0.00911153	0.0904623
mgv1a009681m	834	6	0.00162338	0.0909748
mgv1a012813m	698	6	0.00193968	0.0909748
mgv1a018666m	693	9	0.00308583	0.0963503
mgv1a007538m	740	20	0.00621622	0.0963662
mgv1a001083m	1768	15	0.00195494	0.0984665
mgv1a001501m	2001	58	0.00649123	0.0984947
mgv1a004984m	1062	31	0.00705853	0.0985485
mgv1a006927m	1162	45	0.00874597	0.0989022
mgv1a005422m	967	6	0.00145218	0.0992772
mgv1a010441m	901	30	0.00752871	0.0999528
mgv1a005682m	906	9	0.00241552	0.100243
mgv1a007570m	1013	10	0.00224475	0.102129
mgv1a006583m	956	43	0.0102559	0.103279
mgv1a003205m	881	10	0.00313379	0.103391
mgv1a014664m	490	21	0.00980238	0.106985
mgv1a001808m	1223	30	0.00602138	0.108867
mgv1a010808m	716	5	0.00167568	0.109139
mgv1a017601m	143	5	0.00839013	0.109139
mgv1a012995m	503	5	0.00226434	0.109832
mgv1a001174m	1550	25	0.00363301	0.111578
mgv1a016009m	381	4	0.00241925	0.11172
mgv1a010324m	852	8	0.00214647	0.112171
mgv1a013116m	523	3	0.00131981	0.114668
mgv1a004459m	1396	38	0.00617818	0.114975
mgv1a009145m	922	38	0.00935589	0.115537
mgv1a010752m	808	6	0.00169329	0.118201
mgv1a005225m	976	63	0.0151818	0.118957
mgv1a012289m	538	24	0.0103285	0.120709
mgv1a002450m	1855	21	0.00257901	0.12086
mgv1a012760m	440	25	0.012936	0.121186
mgv1a006632m	931	49	0.0120599	0.121513
mgv1a013374m	487	21	0.0105091	0.121849
mgv1a010521m	698	4	0.00132654	0.122379
mgv1a006060m	1143	72	0.0143137	0.123405
mgv1a001293m	1957	15	0.00175114	0.124454
mgv1a002786m	1575	12	0.00174459	0.126766
mgv1a005789m	967	15	0.00351939	0.127097
mgv1a002098m	1889	59	0.00711131	0.129379
mgv1a009028m	781	28	0.00885723	0.131166
mgv1a005532m	1355	6	0.00102372	0.134165
mgv1a013619m	538	8	0.00340004	0.134496
mgv1a015303m	369	1	0.000665892	0.135164
mgv1a003275m	1478	7	0.00109361	0.136133
mgv1a012994m	685	43	0.0143333	0.137047
mgv1a002354m	1509	50	0.00750863	0.139283
mgv1a001062m	2197	19	0.00198256	0.139829
mgv1a016237m	318	10	0.00719186	0.141704
mgv1a017705m	186	4	0.00514756	0.142579
mgv1a022656m	532	12	0.0051938	0.143806
mgv1a000184m	3879	27	0.00158446	0.147999
mgv1a007232m	1241	34	0.0062803	0.148304
mgv1a011340m	626	37	0.0137771	0.149175
mgv1a003682m	1492	13	0.00200885	0.1498
mgv1a003942m	1441	13	0.00207995	0.1498
mgv1a001584m	1965	27	0.00313109	0.15158
mgv1a007504m	938	3	0.000787741	0.152046
mgv1a022557m	424	4	0.00223043	0.15379
mgv1a000945m	1783	61	0.00778201	0.154272
mgv1a000995m	2338	23	0.00226292	0.15452
mgv1a006998m	942	10	0.00245771	0.155118
mgv1a003685m	979	1	0.000331971	0.155746
mgv1a008935m	985	50	0.0116478	0.155925
mgv1a002113m	1365	6	0.00101708	0.156565
mgv1a007700m	865	6	0.00163123	0.15833
mgv1a001984m	1588	9	0.00138963	0.159315
mgv1a015574m	336	4	0.002845	0.159817
mgv1a021290m	192	1	0.00136218	0.160573
mgv1a001283m	1755	27	0.00351574	0.161248
mgv1a005785m	1060	46	0.00998115	0.163478
mgv1a007274m	1029	23	0.00511592	0.163782
mgv1a016834m	297	17	0.0132351	0.165546
mgv1a020642m	1627	91	0.0127639	0.16878
mgv1a007731m	1177	3	0.000606191	0.170091
mgv1a006748m	955	4	0.000990045	0.172122
mgv1a006038m	1113	21	0.00456644	0.172823
mgv1a000496m	1765	6	0.000798586	0.176745
mgv1a002311m	1461	76	0.011996	0.177349
mgv1a014752m	374	2	0.00139205	0.179432
mgv1a015537m	365	3	0.00196433	0.180868
mgv1a012090m	616	25	0.00940447	0.180896
mgv1a005219m	1311	69	0.0120598	0.181713
mgv1a001136m	2045	17	0.00191725	0.182316
mgv1a014036m	462	29	0.0159383	0.184787
mgv1a009387m	834	29	0.00852419	0.186764
mgv1a012096m	569	15	0.00648896	0.186934
mgv1a016199m	276	9	0.00825654	0.188535
mgv1a011487m	741	4	0.0012854	0.189887
mgv1a002107m	1740	91	0.0120119	0.192379
mgv1a002047m	2070	71	0.00794384	0.192602
mgv1a002088m	1885	6	0.000752567	0.194043
mgv1a003500m	1189	5	0.00104286	0.196187
mgv1a003968m	1544	72	0.0108126	0.196961
mgv1a005906m	1038	9	0.00203854	0.197009
mgv1a003678m	1050	42	0.00929553	0.199279
mgv1a009964m	716	37	0.0122164	0.199344
mgv1a009069m	969	8	0.00194715	0.201032
mgv1a002253m	1373	25	0.00540116	0.202697
mgv1a007545m	1097	27	0.00569321	0.202787
mgv1a007175m	766	2	0.000639513	0.203421
mgv1a001038m	1896	88	0.0106978	0.205182
mgv1a006480m	823	25	0.00721006	0.206532
mgv1a020843m	1408	8	0.00140319	0.207799
mgv1a016316m	276	4	0.00359518	0.208581
mgv1a015630m	234	9	0.00969209	0.210028
mgv1a003684m	1032	5	0.00119649	0.210571
mgv1a010047m	687	6	0.0021927	0.212053
mgv1a009315m	834	3	0.000873096	0.215354
mgv1a009647m	637	15	0.00553784	0.217036
mgv1a015802m	256	1	0.00103034	0.218724
mgv1a005415m	1011	8	0.00196151	0.219055
mgv1a012472m	677	31	0.010639	0.220954
mgv1a008344m	857	8	0.00221793	0.222443
mgv1a005306m	1193	58	0.0113597	0.223031
mgv1a001013m	2591	55	0.00496397	0.225411
mgv1a001887m	2038	4	0.000474218	0.225418
mgv1a011355m	668	7	0.00250129	0.228625
mgv1a006850m	884	6	0.00169683	0.228737
mgv1a010028m	961	62	0.0150961	0.229016
mgv1a004348m	1399	15	0.002512	0.22948
mgv1a011799m	624	28	0.0106245	0.229944
mgv1a014267m	526	21	0.00939809	0.230468
mgv1a010292m	671	19	0.0066736	0.231664
mgv1a008625m	708	20	0.00688884	0.231946
mgv1a000870m	2337	40	0.00398502	0.232939
mgv1a011784m	631	2	0.000837092	0.23295
mgv1a006510m	847	9	0.0026698	0.234846
mgv1a005376m	1057	4	0.000911671	0.236156
mgv1a012233m	591	11	0.00438724	0.236331
mgv1a012202m	591	11	0.00438724	0.236331
mgv1a000192m	4159	24	0.00135999	0.238025
mgv1a012399m	596	3	0.00123465	0.239063
mgv1a012581m	600	3	0.00122642	0.239063
mgv1a012482m	560	3	0.00131402	0.239063
mgv1a002717m	1555	32	0.00484315	0.239789
mgv1a015081m	282	8	0.00750307	0.240419
mgv1a013566m	397	18	0.0112125	0.243401
mgv1a006669m	957	53	0.0134852	0.245713
mgv1a004503m	1379	7	0.00121925	0.246413
mgv1a027046m	1165	7	0.00143303	0.247392
mgv1a023126m	1583	70	0.0128831	0.247847
mgv1a008339m	1065	18	0.00400521	0.248313
mgv1a016761m	216	6	0.0068065	0.24837
mgv1a009204m	870	34	0.00914763	0.249007
mgv1a012939m	538	8	0.0035655	0.249209
mgv1a005792m	984	5	0.00129836	0.250342
mgv1a018735m	1361	20	0.0034843	0.253615
mgv1a003434m	1236	21	0.00446642	0.256152
mgv1a022248m	826	38	0.0108705	0.257527
mgv1a000680m	2066	7	0.000880613	0.257621
mgv1a004178m	1533	76	0.011596	0.258469
mgv1a011369m	837	36	0.0101749	0.260688
mgv1a000164m	3522	92	0.00611186	0.261514
mgv1a002294m	1741	10	0.00136733	0.262077
mgv1a009780m	706	2	0.00075181	0.264612
mgv1a009031m	1019	33	0.00767527	0.265459
mgv1a025109m	1279	2	0.000398596	0.268369
mgv1a004608m	1095	32	0.00693324	0.268442
mgv1a010002m	789	37	0.0111252	0.27146
mgv1a012878m	657	45	0.0162344	0.27186
mgv1a009479m	848	40	0.0111884	0.272359
mgv1a013931m	492	3	0.00151835	0.273549
mgv1a014906m	398	3	0.00187696	0.273549
mgv1a005535m	1374	7	0.00123538	0.273687
mgv1a003857m	1491	62	0.00984993	0.274457
mgv1a016325m	231	4	0.00464509	0.275294
mgv1a000553m	2821	5	0.000431826	0.282151
mgv1a009817m	716	30	0.0102396	0.283084
mgv1a012267m	635	45	0.0168496	0.28339
mgv1a010760m	803	85	0.0251128	0.283978
mgv1a010429m	762	6	0.00192403	0.284524
mgv1a002757m	1532	60	0.00930351	0.284625
mgv1a023143m	886	56	0.0158787	0.288151
mgv1a002427m	1076	55	0.0120655	0.288202
mgv1a022824m	432	7	0.00398022	0.288779
mgv1a012041m	683	4	0.00145185	0.289373
mgv1a003104m	1703	21	0.00295487	0.291522
mgv1a009205m	768	4	0.00128348	0.292301
mgv1a024643m	432	3	0.00181564	0.292388
mgv1a015725m	430	2	0.00119123	0.292661
mgv1a012668m	546	13	0.00578871	0.293785
mgv1a022738m	1031	47	0.0118901	0.294301
mgv1a014188m	447	21	0.0117722	0.294679
mgv1a000285m	3511	121	0.00813085	0.295257
mgv1a003758m	1180	51	0.0103868	0.29552
mgv1a005117m	1184	31	0.00626098	0.296011
mgv1a010805m	712	38	0.0133278	0.29803
mgv1a025481m	1121	30	0.00636144	0.300971
mgv1a005837m	887	7	0.00194701	0.301561
mgv1a000720m	2071	7	0.000822427	0.304755
mgv1a007416m	736	44	0.0151003	0.304976
mgv1a011139m	865	59	0.0163037	0.307632
mgv1a005066m	1090	29	0.0066732	0.307923
mgv1a011543m	619	14	0.00547422	0.308423
mgv1a014970m	357	6	0.00414198	0.308475
mgv1a013516m	501	3	0.00151479	0.310191
mgv1a015098m	298	20	0.0169062	0.311764
mgv1a010363m	850	32	0.00904756	0.314879
mgv1a011115m	789	4	0.00127008	0.316021
mgv1a013936m	535	4	0.00187308	0.316021
mgv1a001303m	2197	51	0.00556537	0.31642
mgv1a005414m	1224	36	0.00701341	0.317114
mgv1a009988m	842	38	0.0108415	0.317698
mgv1a006368m	995	8	0.00197283	0.317728
mgv1a001997m	1454	10	0.00166759	0.318919
mgv1a021085m	2090	78	0.00887032	0.319012
mgv1a001578m	2096	71	0.00811736	0.319862
mgv1a004141m	1503	7	0.00114748	0.319933
mgv1a005489m	1237	16	0.00313646	0.321062
mgv1a001589m	2312	23	0.00238479	0.322485
mgv1a004442m	1526	6	0.000974032	0.323112
mgv1a015623m	428	15	0.00851147	0.323119
mgv1a004889m	1100	53	0.0115742	0.32449
mgv1a002497m	1874	81	0.0102877	0.324852
mgv1a019263m	982	6	0.00151504	0.325773
mgv1a006761m	888	46	0.0126705	0.328342
mgv1a008641m	746	28	0.0097838	0.328537
mgv1a004050m	1578	64	0.00967359	0.329513
mgv1a007907m	733	25	0.00818731	0.330287
mgv1a023728m	1605	11	0.00166849	0.337747
mgv1a014440m	451	6	0.00334099	0.340531
mgv1a009096m	870	1	0.000315719	0.341676
mgv1a012976m	567	1	0.000484436	0.341676
mgv1a009825m	716	23	0.00774595	0.343148
mgv1a019703m	1184	10	0.0021713	0.346406
mgv1a003137m	1094	13	0.00289181	0.3468
mgv1a017868m	419	30	0.0185301	0.34705
mgv1a002001m	1840	21	0.00277892	0.347287
mgv1a000973m	2048	68	0.00795645	0.348128
mgv1a001197m	2201	95	0.0103421	0.352341
mgv1a008214m	871	44	0.0122384	0.352463
mgv1a023977m	1194	5	0.00104745	0.352773
mgv1a017248m	199	5	0.00672594	0.352789
mgv1a003614m	1451	13	0.00220046	0.352791
mgv1a001138m	2013	18	0.00216934	0.353754
mgv1a004921m	1103	10	0.00222416	0.355699
mgv1a003326m	1519	9	0.00145815	0.357845
mgv1a010771m	715	48	0.0162799	0.35808
mgv1a014679m	515	2	0.00102719	0.359591
mgv1a015003m	288	2	0.00186508	0.362144
mgv1a025256m	672	64	0.0232708	0.362201
mgv1a010488m	725	7	0.00239678	0.363222
mgv1a010630m	834	36	0.0104317	0.366153
mgv1a000456m	2784	33	0.00288913	0.367279
mgv1a016696m	177	9	0.0127438	0.368326
mgv1a015708m	440	5	0.00287942	0.368914
mgv1a008821m	1024	4	0.000999083	0.369317
mgv1a015977m	364	5	0.00345726	0.369723
mgv1a015149m	388	2	0.00137061	0.370746
mgv1a011964m	569	1	0.000520481	0.370794
mgv1a005637m	1150	37	0.00784553	0.372326
mgv1a000425m	3202	27	0.00206195	0.372455
mgv1a003337m	1317	8	0.00158281	0.373422
mgv1a011095m	681	25	0.0089922	0.375673
mgv1a013529m	610	2	0.000915824	0.376404
mgv1a000057m	4253	9	0.000524	0.376929
mgv1a012244m	684	3	0.00114119	0.377007
mgv1a003269m	1605	4	0.000639598	0.378199
mgv1a016568m	343	1	0.000825128	0.381607
mgv1a016584m	340	1	0.000832408	0.381607
mgv1a016464m	335	1	0.000844832	0.381607
mgv1a001563m	1841	1	0.000153731	0.381607
mgv1a014731m	456	1	0.000620655	0.381607
mgv1a010974m	672	34	0.0124771	0.382429
mgv1a013595m	585	25	0.0104905	0.383496
mgv1a013891m	518	4	0.00198581	0.383529
mgv1a014341m	338	3	0.00236844	0.384303
mgv1a007171m	1112	42	0.00923161	0.384515
mgv1a011567m	599	25	0.0102547	0.386791
mgv1a025096m	1022	7	0.00172652	0.387524
mgv1a010911m	806	9	0.00277464	0.387835
mgv1a000857m	2417	9	0.000932135	0.388409
mgv1a007039m	945	8	0.00226157	0.388818
mgv1a000473m	2923	22	0.00185425	0.390984
mgv1a012690m	600	29	0.0124049	0.393705
mgv1a004699m	1480	3	0.000531192	0.39425
mgv1a001250m	1993	76	0.00924535	0.394711
mgv1a010992m	574	34	0.0146835	0.401869
mgv1a002944m	1627	11	0.00169227	0.403925
mgv1a014114m	385	2	0.00142486	0.407808
mgv1a012246m	635	2	0.000846712	0.407946
mgv1a004744m	1482	5	0.000867149	0.408409
mgv1a010033m	700	33	0.0115325	0.408483
mgv1a002142m	1891	18	0.00236399	0.40946
mgv1a010224m	951	31	0.00804112	0.409586
mgv1a015866m	244	10	0.0103788	0.40987
mgv1a001286m	1817	15	0.0020449	0.415087
mgv1a013525m	390	3	0.0023199	0.416757
mgv1a008196m	1125	19	0.0041997	0.416905
mgv1a009586m	819	31	0.00928674	0.417165
mgv1a003938m	1040	47	0.0112216	0.417547
mgv1a002503m	1954	39	0.00492423	0.41773
mgv1a000942m	1963	10	0.00127455	0.418394
mgv1a020208m	2055	16	0.00200806	0.419112
mgv1a012751m	431	9	0.00527919	0.419658
mgv1a018523m	271	2	0.00214159	0.419709
mgv1a003876m	1470	55	0.00921529	0.420306
mgv1a006810m	1108	26	0.00581629	0.420322
mgv1a002505m	1669	69	0.0101711	0.420575
mgv1a006570m	926	36	0.0102509	0.424282
mgv1a010583m	738	2	0.000739529	0.426521
mgv1a016148m	391	2	0.00139584	0.426521
mgv1a004908m	1363	91	0.0164367	0.427764
mgv1a004418m	1149	5	0.00113549	0.430542
mgv1a008271m	1009	51	0.01249	0.431109
mgv1a003412m	1159	36	0.00763869	0.43117
mgv1a003818m	1267	7	0.00141307	0.431399
mgv1a016108m	308	8	0.00657151	0.433344
mgv1a014319m	375	19	0.0126587	0.433698
mgv1a010842m	629	25	0.01044	0.437599
mgv1a011594m	508	5	0.00263799	0.438924
mgv1a007635m	836	47	0.013829	0.440178
mgv1a001301m	2420	3	0.000331214	0.441669
mgv1a002660m	1619	4	0.000650038	0.443931
mgv1a000574m	2179	27	0.00400436	0.445046
mgv1a010544m	721	7	0.00249479	0.445629
mgv1a007833m	1006	9	0.00228052	0.446024
mgv1a006879m	1152	6	0.00134728	0.448189
mgv1a009993m	822	17	0.00516321	0.450314
mgv1a002241m	1303	42	0.00854635	0.450635
mgv1a026576m	1905	142	0.0192644	0.452848
mgv1a002474m	1699	57	0.00827186	0.454198
mgv1a009347m	840	27	0.00803884	0.455076
mgv1a012673m	601	4	0.00174925	0.459088
mgv1a001346m	2087	28	0.00333356	0.459866
mgv1a005825m	1217	34	0.00697951	0.460468
mgv1a003739m	969	14	0.00363275	0.461646
mgv1a003089m	1402	75	0.0131978	0.462437
mgv1a013976m	585	48	0.0204555	0.463673
mgv1a012742m	470	3	0.00178804	0.465368
mgv1a008152m	1001	39	0.00973799	0.467137
mgv1a011231m	594	13	0.00569824	0.469504
mgv1a002825m	1516	11	0.00185259	0.469625
mgv1a000033m	4392	140	0.00786185	0.470312
mgv1a007964m	711	22	0.0079862	0.472017
mgv1a009811m	779	44	0.0150736	0.477942
mgv1a010382m	939	30	0.00803001	0.478251
mgv1a009491m	935	22	0.00594177	0.480497
mgv1a000353m	2606	56	0.0053749	0.480642
mgv1a011092m	635	6	0.00267967	0.480946
mgv1a008830m	793	48	0.016345	0.481982
mgv1a000829m	2746	10	0.000935991	0.482928
mgv1a002942m	1762	12	0.00174187	0.483067
mgv1a012502m	534	10	0.00501817	0.485083
mgv1a005245m	1301	55	0.0105875	0.485139
mgv1a000082m	5256	158	0.00749548	0.485241
mgv1a017288m	185	7	0.00993029	0.488182
mgv1a003160m	1663	9	0.00139804	0.488991
mgv1a000130m	3664	13	0.000901187	0.490577
mgv1a009183m	884	22	0.00625698	0.491149
mgv1a002315m	1397	9	0.00165522	0.494161
mgv1a010388m	678	5	0.00196768	0.494435
mgv1a003149m	1556	47	0.00754015	0.496939
mgv1a009569m	804	6	0.00196258	0.497422
mgv1a000201m	4090	7	0.000447308	0.497805
mgv1a020683m	809	23	0.00721271	0.500069
mgv1a009287m	1009	47	0.0117288	0.501764
mgv1a006834m	909	7	0.00218625	0.502221
mgv1a004076m	1157	17	0.00372437	0.50413
mgv1a002873m	1418	96	0.0169942	0.505918
mgv1a004633m	962	74	0.0191984	0.507875
mgv1a009539m	860	38	0.0111656	0.50833
mgv1a013083m	382	2	0.00147379	0.508958
mgv1a010144m	963	10	0.00269075	0.509871
mgv1a006069m	949	32	0.00891447	0.511442
mgv1a008933m	941	29	0.00782432	0.514832
mgv1a012308m	519	35	0.0170852	0.515083
mgv1a017580m	110	4	0.0101186	0.515285
mgv1a001119m	2079	131	0.0157237	0.516653
mgv1a005176m	1478	15	0.00260754	0.517284
mgv1a012471m	520	19	0.00934392	0.517661
mgv1a000565m	2850	89	0.00786519	0.518127
mgv1a013972m	458	11	0.00622217	0.518694
mgv1a011554m	720	7	0.00255843	0.519149
mgv1a011550m	562	5	0.0023617	0.519443
mgv1a007685m	803	11	0.00401655	0.520046
mgv1a004408m	1072	25	0.00664833	0.521023
mgv1a010745m	639	24	0.0100913	0.522334
mgv1a026966m	773	47	0.0157705	0.522555
mgv1a011122m	811	6	0.00196202	0.522704
mgv1a006870m	1154	56	0.0122734	0.524437
mgv1a001894m	1534	28	0.00461445	0.524668
mgv1a008391m	834	7	0.00222899	0.525251
mgv1a011509m	555	14	0.0067215	0.526576
mgv1a021504m	1297	14	0.00293091	0.526632
mgv1a016727m	312	1	0.000985504	0.528425
mgv1a004731m	1253	1	0.000245393	0.528425
mgv1a016565m	330	1	0.000931749	0.528425
mgv1a010582m	800	50	0.0158395	0.529101
mgv1a000381m	3141	94	0.00755723	0.529667
mgv1a003230m	1716	55	0.00812104	0.531079
mgv1a026549m	845	23	0.00713941	0.535072
mgv1a005522m	1172	6	0.00136364	0.53601
mgv1a003627m	1277	8	0.00163787	0.536945
mgv1a023113m	1674	30	0.00560392	0.537066
mgv1a003165m	1465	45	0.00780809	0.537541
mgv1a015077m	341	3	0.00247531	0.537781
mgv1a007261m	1027	56	0.0137388	0.538662
mgv1a002629m	1323	54	0.0102885	0.539306
mgv1a000871m	1781	18	0.00258428	0.539714
mgv1a004663m	973	53	0.0139498	0.541729
mgv1a014957m	427	5	0.0031327	0.542042
mgv1a025992m	1255	88	0.0183721	0.542246
mgv1a006606m	974	43	0.0112549	0.547351
mgv1a017068m	225	17	0.0193882	0.548258
mgv1a002518m	1993	53	0.00677353	0.550841
mgv1a001459m	2263	33	0.00373462	0.554272
mgv1a016608m	266	8	0.00796278	0.555403
mgv1a013993m	500	3	0.00167855	0.558059
mgv1a008879m	776	32	0.0108394	0.560513
mgv1a007562m	964	40	0.0105445	0.560826
mgv1a001112m	1877	38	0.00536111	0.562179
mgv1a005493m	1353	17	0.00326164	0.564221
mgv1a005516m	1377	17	0.00320479	0.564221
mgv1a006620m	904	5	0.0015043	0.570948
mgv1a009769m	764	2	0.000757292	0.57112
mgv1a003086m	1751	7	0.00106957	0.571325
mgv1a003111m	1324	70	0.0149361	0.574787
mgv1a001784m	1885	27	0.00367185	0.575557
mgv1a010246m	935	17	0.00473697	0.57751
mgv1a006278m	868	16	0.00488573	0.579647
mgv1a008554m	1054	9	0.00226749	0.579809
mgv1a008848m	677	28	0.0106866	0.580183
mgv1a004618m	1496	67	0.0114725	0.580278
mgv1a010089m	765	2	0.000759698	0.58148
mgv1a012983m	664	19	0.00744698	0.582207
mgv1a009410m	768	5	0.00176711	0.584416
mgv1a011214m	726	44	0.0155933	0.584537
mgv1a011348m	831	27	0.00841181	0.58573
mgv1a012259m	754	4	0.00146992	0.586054
mgv1a012376m	742	4	0.00149369	0.586054
mgv1a004680m	1364	59	0.0111077	0.586735
mgv1a005758m	741	22	0.00820617	0.587193
mgv1a003564m	1272	27	0.00545924	0.58809
mgv1a014669m	336	2	0.00175743	0.590579
mgv1a013037m	533	15	0.00743677	0.591479
mgv1a014556m	493	27	0.0140987	0.591671
mgv1a006608m	916	4	0.00120513	0.592847
mgv1a007682m	816	28	0.00883228	0.593281
mgv1a008581m	748	9	0.00347806	0.593373
mgv1a009631m	707	61	0.0238984	0.593532
mgv1a013584m	523	5	0.00280143	0.59529
mgv1a015947m	356	20	0.0146692	0.598338
mgv1a000510m	3217	57	0.00456541	0.59934
mgv1a012417m	623	14	0.00592027	0.600762
mgv1a004734m	1084	4	0.00106781	0.604215
mgv1a010200m	692	2	0.000853318	0.605001
mgv1a002292m	1791	80	0.0115142	0.610242
mgv1a001741m	2196	119	0.0139454	0.611104
mgv1a000733m	2196	32	0.00376127	0.611442
mgv1a011868m	562	16	0.00773978	0.611573
mgv1a004433m	1365	9	0.00176828	0.613011
mgv1a000903m	2374	57	0.006165	0.61481
mgv1a026120m	647	9	0.00392053	0.615715
mgv1a004619m	1094	41	0.00980944	0.61976
mgv1a009977m	669	54	0.0214383	0.622883
mgv1a005817m	1031	5	0.00135322	0.627136
mgv1a017021m	284	7	0.00671253	0.628244
mgv1a000773m	2131	6	0.000767885	0.629314
mgv1a000127m	4634	142	0.00792143	0.632534
mgv1a015357m	462	15	0.00861566	0.633655
mgv1a007905m	894	32	0.00950555	0.63404
mgv1a004665m	918	37	0.0104497	0.636312
mgv1a005324m	1011	72	0.0183527	0.636531
mgv1a009002m	871	13	0.00414702	0.63975
mgv1a006130m	726	24	0.0106079	0.641045
mgv1a005078m	1073	19	0.00483362	0.641342
mgv1a000651m	2377	11	0.00124299	0.643442
mgv1a015661m	393	3	0.00220668	0.644274
mgv1a008923m	828	42	0.0131588	0.644499
mgv1a008220m	800	2	0.000746753	0.646232
mgv1a011204m	662	2	0.000902421	0.646232
mgv1a008311m	856	4	0.00132252	0.646456
mgv1a004134m	1435	69	0.0125187	0.647369
mgv1a005619m	1154	30	0.00678217	0.649614
mgv1a014343m	541	15	0.0073433	0.652184
mgv1a010092m	738	22	0.00782476	0.652352
mgv1a008949m	790	30	0.0106199	0.652367
mgv1a006711m	1125	47	0.0109338	0.655592
mgv1a014096m	436	3	0.00203941	0.657851
mgv1a001720m	1679	78	0.012414	0.658758
mgv1a000449m	2780	7	0.000687658	0.658862
mgv1a008716m	653	22	0.00898856	0.659136
mgv1a008361m	796	25	0.00824333	0.661419
mgv1a011565m	584	2	0.00104212	0.662851
mgv1a019323m	701	35	0.0139727	0.663132
mgv1a011046m	777	1	0.000425403	0.666853
mgv1a012500m	549	23	0.0111072	0.666855
mgv1a012584m	549	23	0.0111072	0.666855
mgv1a014615m	539	11	0.00552049	0.668391
mgv1a002772m	1796	10	0.00151202	0.669735
mgv1a007983m	1018	5	0.00138184	0.672724
mgv1a016672m	317	16	0.0135354	0.678917
mgv1a002162m	2000	147	0.0192152	0.680427
mgv1a006498m	921	23	0.0068015	0.680683
mgv1a007334m	1090	6	0.0015361	0.681046
mgv1a001552m	1329	54	0.0107686	0.681432
mgv1a018050m	823	26	0.00981774	0.682385
mgv1a012407m	488	7	0.00399946	0.682473
mgv1a000556m	2965	132	0.0116505	0.683014
mgv1a024902m	617	6	0.00282003	0.683519
mgv1a027080m	351	2	0.00191898	0.684592
mgv1a002934m	1564	4	0.000760369	0.684736
mgv1a002222m	1521	71	0.0122611	0.684798
mgv1a021489m	645	58	0.0234964	0.686703
mgv1a003216m	1355	70	0.0144517	0.686993
mgv1a013643m	541	14	0.00698166	0.687305
mgv1a008367m	883	48	0.0142328	0.687632
mgv1a016112m	298	3	0.00294169	0.689456
mgv1a003787m	1394	47	0.00890108	0.691108
mgv1a013177m	668	28	0.0110652	0.691695
mgv1a004049m	1446	45	0.00822143	0.692
mgv1a009161m	1023	40	0.0103538	0.695965
mgv1a001554m	2145	88	0.010792	0.696745
mgv1a002110m	1561	69	0.0115627	0.697018
mgv1a019166m	678	3	0.00160989	0.697128
mgv1a013538m	497	23	0.0127723	0.699227
mgv1a007382m	839	4	0.00138335	0.700022
mgv1a019537m	1270	20	0.00422369	0.700198
mgv1a011422m	537	18	0.01052	0.700778
mgv1a002472m	1618	91	0.0148297	0.707461
mgv1a005453m	1057	8	0.00208443	0.708283
mgv1a002012m	1258	4	0.00091415	0.710093
mgv1a024059m	1212	54	0.0128451	0.710366
mgv1a016427m	285	1	0.00119341	0.714122
mgv1a013171m	527	1	0.00064539	0.714122
mgv1a002135m	1357	27	0.00528812	0.715928
mgv1a006942m	1070	32	0.00792693	0.716415
mgv1a003754m	1237	46	0.0104032	0.717318
mgv1a012384m	587	24	0.0115432	0.71881
mgv1a010036m	872	16	0.00497343	0.719084
mgv1a015717m	340	8	0.00654417	0.719207
mgv1a003856m	1436	9	0.00173584	0.723359
mgv1a009055m	1007	32	0.00850025	0.724576
mgv1a010375m	724	5	0.00197675	0.725891
mgv1a005210m	988	5	0.00150538	0.732222
mgv1a011608m	601	17	0.00786367	0.734845
mgv1a007270m	1125	46	0.0109133	0.73508
mgv1a003482m	1439	39	0.00725521	0.739147
mgv1a010751m	618	9	0.00402534	0.73953
mgv1a005022m	1166	52	0.0118181	0.740583
mgv1a001688m	1847	117	0.0166908	0.740783
mgv1a006450m	892	42	0.0126945	0.741463
mgv1a008824m	903	10	0.00306998	0.742482
mgv1a005929m	926	13	0.00401029	0.743867
mgv1a007533m	878	20	0.0062273	0.745987
mgv1a001800m	1566	17	0.00293825	0.746297
mgv1a016022m	387	3	0.00235617	0.746806
mgv1a011755m	635	3	0.00150536	0.748104
mgv1a015209m	297	4	0.00402667	0.748317
mgv1a005481m	1032	4	0.00113007	0.751377
mgv1a002992m	1386	3	0.000647008	0.751541
mgv1a024117m	2034	10	0.00136705	0.753259
mgv1a008601m	917	14	0.00419516	0.755449
mgv1a003217m	1705	88	0.013768	0.755868
mgv1a003735m	1421	80	0.015039	0.759195
mgv1a001750m	1572	14	0.00248689	0.760985
mgv11b016521m	1063	50	0.0132883	0.762586
mgv1a012369m	583	28	0.0135426	0.763798
mgv1a020314m	2646	87	0.00872746	0.765198
mgv1a011610m	685	39	0.0153433	0.766595
mgv1a009582m	1000	36	0.00971628	0.768189
mgv1a014776m	379	12	0.00930248	0.76907
mgv1a001619m	2054	7	0.000962961	0.771381
mgv1a013986m	439	13	0.00825268	0.772389
mgv1a015201m	283	20	0.0194506	0.772452
mgv1a003551m	1105	47	0.0116325	0.773821
mgv1a009820m	766	47	0.0165316	0.775285
mgv1a005900m	912	9	0.00290997	0.778026
mgv1a023513m	981	40	0.010939	0.77875
mgv1a003776m	820	41	0.0142121	0.779737
mgv1a005680m	1213	46	0.0102316	0.780026
mgv1a008537m	930	24	0.00703621	0.780431
mgv1a002641m	1281	62	0.0129323	0.782252
mgv1a014428m	529	7	0.00377676	0.783585
mgv1a000481m	2437	94	0.0102865	0.787291
mgv1a007068m	975	39	0.0108362	0.788279
mgv1a000547m	2405	5	0.000603721	0.790634
mgv1a000921m	2107	132	0.0167195	0.798107
mgv1a022094m	780	38	0.0131477	0.80028
mgv1a003891m	1521	66	0.0116392	0.800955
mgv1a010774m	781	6	0.00221079	0.801335
mgv1a000129m	3887	6	0.000444205	0.801335
mgv1a005229m	1138	13	0.00318641	0.802271
mgv1a006663m	1273	43	0.00917294	0.803761
mgv1a005529m	1405	10	0.00200741	0.804451
mgv1a002954m	1317	70	0.0142635	0.80509
mgv1a001127m	2623	66	0.00680776	0.807246
mgv1a005327m	958	64	0.0180911	0.809945
mgv1a021747m	502	17	0.00938385	0.81036
mgv1a001899m	1681	102	0.01708	0.811651
mgv1a011163m	798	3	0.00115593	0.814549
mgv1a001747m	1639	6	0.00105782	0.814948
mgv1a004321m	1369	22	0.0044287	0.815478
mgv1a013770m	559	3	0.0016514	0.816704
mgv1a006693m	1086	23	0.00583309	0.81723
mgv1a006861m	1089	36	0.00904156	0.823164
mgv1a014135m	542	5	0.00272562	0.826148
mgv1a007835m	899	69	0.020712	0.828385
mgv1a012555m	556	23	0.0114261	0.828763
mgv1a004635m	1163	51	0.0118781	0.831567
mgv1a000796m	1866	29	0.00476157	0.833231
mgv1a014100m	333	5	0.0044468	0.833744
mgv1a003147m	1346	84	0.0178505	0.834714
mgv1a007241m	813	10	0.00349922	0.835885
mgv1a001324m	1730	9	0.00147924	0.839496
mgv1a005944m	1028	23	0.00615872	0.842811
mgv1a014787m	468	11	0.00699594	0.844011
mgv1a009326m	604	19	0.00883252	0.846547
mgv1a009665m	729	38	0.0149282	0.848877
mgv1a015367m	406	20	0.0137335	0.852237
mgv1a008171m	938	11	0.00360612	0.852429
mgv1a016943m	229	1	0.00169038	0.853336
mgv1a019319m	640	34	0.0146554	0.855189
mgv1a010195m	815	7	0.00248984	0.858529
mgv1a010257m	812	7	0.00249904	0.858529
mgv1a001481m	1812	8	0.00127003	0.858703
mgv1a003116m	1368	12	0.00247541	0.859584
mgv1a010335m	679	25	0.0101601	0.860559
mgv1a006136m	1284	20	0.00435342	0.862273
mgv1a000315m	3506	11	0.000895739	0.864663
mgv1a001085m	2335	65	0.00763994	0.868133
mgv1a001413m	2281	62	0.00746329	0.868191
mgv1a006016m	1114	42	0.0104006	0.868744
mgv1a010525m	564	7	0.0040556	0.870224
mgv1a011721m	705	1	0.000514875	0.871212
mgv1a013011m	629	1	0.000577086	0.871212
mgv1a015213m	447	1	0.000812051	0.871212
mgv1a005820m	1269	31	0.00677611	0.87134
mgv1a000822m	2088	63	0.00864702	0.876557
mgv1a003892m	1266	26	0.00572739	0.879101
mgv1a005369m	1353	31	0.00691233	0.881235
mgv1a005399m	1394	4	0.000878779	0.882735
mgv1a011994m	574	29	0.014396	0.882871
mgv1a000220m	2818	20	0.00198123	0.884882
mgv1a006912m	1003	35	0.0100934	0.886583
mgv1a012927m	464	2	0.00142473	0.886665
mgv1a014596m	440	2	0.00150245	0.886665
mgv1a004632m	1058	45	0.0125067	0.887903
mgv1a017625m	166	4	0.00764793	0.888722
mgv1a025768m	1511	7	0.00137254	0.889546
mgv1a007073m	889	36	0.0111807	0.892075
mgv1a005732m	1280	32	0.00697447	0.897809
mgv1a005492m	1300	32	0.00686717	0.897809
mgv1a002823m	1734	28	0.00452132	0.902217
mgv1a001853m	2068	8	0.00112789	0.906519
mgv1a002767m	1839	57	0.0085936	0.906568
mgv1a025938m	1256	44	0.00968184	0.909288
mgv1a001793m	1900	48	0.00702527	0.910696
mgv1a005618m	1419	65	0.0127012	0.912762
mgv1a004277m	1432	43	0.00837257	0.9158
mgv1a012565m	529	5	0.00292771	0.915835
mgv1a000390m	3314	13	0.0011275	0.916815
mgv1a013671m	573	1	0.000650029	0.91854
mgv1a007669m	677	7	0.00347002	0.919336
mgv1a013973m	380	5	0.00408035	0.919681
mgv1a006903m	1008	89	0.0265889	0.921384
mgv1a014316m	430	7	0.00480519	0.921407
mgv1a021743m	748	7	0.00276234	0.921407
mgv1a012593m	648	18	0.00790262	0.921499
mgv1a012264m	635	24	0.0106715	0.922652
mgv1a015160m	380	16	0.0128697	0.922664
mgv1a007922m	906	38	0.0116546	0.922934
mgv1a006003m	1032	10	0.00290979	0.928446
mgv1a012327m	528	8	0.0049939	0.928818
mgv1a002703m	1606	74	0.0128253	0.934862
mgv1a025284m	722	13	0.00576077	0.940065
mgv1a005116m	1406	36	0.00720234	0.941689
mgv1a002838m	1444	70	0.0136253	0.943149
mgv1a001603m	2210	7	0.000946716	0.943669
mgv1a002913m	946	2	0.000726276	0.945275
mgv1a006860m	784	10	0.00371554	0.94753
mgv1a002541m	1925	82	0.0118809	0.94766
mgv1a001437m	2049	10	0.00143105	0.948149
mgv1a007945m	788	23	0.00871522	0.948815
mgv1a001311m	2136	75	0.00973418	0.948826
mgv1a014882m	329	5	0.00473172	0.956242
mgv1a010109m	783	19	0.00695153	0.956365
mgv1a009372m	898	21	0.00668151	0.957344
mgv1a010314m	888	6	0.00203873	0.96098
mgv1a019185m	181	6	0.010271	0.962831
mgv1a014504m	457	4	0.0027848	0.96454
mgv1a004331m	1386	34	0.00694728	0.966407
mgv1a013269m	491	1	0.000778723	0.967935
mgv1a008564m	1090	2	0.000626366	0.973116
mgv1a009728m	857	4	0.00147264	0.976891
mgv1a000804m	2380	97	0.0113484	0.977312
mgv1a002760m	1906	7	0.00110945	0.981616
mgv1a002418m	1348	6	0.00135217	0.984494
mgv1a003761m	1495	56	0.0105091	0.988171
mgv1a005351m	1053	19	0.00517569	0.989036
mgv1a005328m	1124	16	0.00410928	0.991354
mgv1a002224m	1954	67	0.00967787	0.992561
mgv1a016898m	199	10	0.0154685	0.992669
mgv1a008565m	902	10	0.0032903	0.993952
mgv1a011253m	651	8	0.00369372	0.994353
mgv1a004985m	1016	37	0.0104571	1.00157
mgv1a007036m	1133	3	0.00086781	1.00207
mgv1a012609m	722	16	0.00645675	1.00208
mgv1a000893m	1583	13	0.0024658	1.00409
mgv1a007004m	1055	6	0.00174869	1.00572
mgv1a010480m	691	7	0.00324687	1.006
mgv1a010530m	691	7	0.00324687	1.006
mgv1a011861m	547	18	0.0102278	1.00811
mgv1a007430m	1020	33	0.00925789	1.00862
mgv1a000099m	5121	20	0.0011318	1.0103
mgv1a005840m	981	46	0.0133494	1.01064
mgv1a002484m	1529	22	0.00416042	1.0125
mgv1a002038m	2061	75	0.010312	1.01523
mgv1a002751m	1329	61	0.0135734	1.01631
mgv1a002766m	1831	80	0.0123775	1.01649
mgv1a006713m	1032	9	0.00273929	1.01748
mgv1a000780m	2535	72	0.00806046	1.02022
mgv1a011491m	602	14	0.00738807	1.02148
mgv1a015252m	413	11	0.00792889	1.02434
mgv1a014007m	510	19	0.0108631	1.02931
mgv1a015105m	335	1	0.00116816	1.0318
mgv1a006845m	999	1	0.000423704	1.03204
mgv1a012131m	572	2	0.00126296	1.03318
mgv1a012434m	664	19	0.00835522	1.03508
mgv1a006290m	1059	40	0.0117556	1.03851
mgv1a013027m	575	8	0.00425995	1.03899
mgv11b004906m	1024	31	0.00873583	1.0395
mgv1a005113m	1203	35	0.00837529	1.03957
mgv1a011507m	610	17	0.00817725	1.03974
mgv1a001861m	1714	104	0.0171244	1.04038
mgv1a000579m	2081	67	0.00925199	1.04046
mgv1a006871m	1248	20	0.00467834	1.04091
mgv1a001662m	2168	115	0.0163672	1.04245
mgv1a011444m	641	23	0.010511	1.04303
mgv1a003241m	1328	31	0.00674396	1.04458
mgv1a006274m	1298	27	0.00603143	1.04687
mgv1a022881m	997	9	0.00271724	1.04942
mgv1a009970m	772	6	0.00241959	1.04963
mgv1a007803m	1178	37	0.00906617	1.05591
mgv1a003377m	1740	44	0.00727889	1.05653
mgv1a010620m	582	30	0.0156974	1.0601
mgv1a026235m	343	29	0.0310982	1.06269
mgv1a003846m	1105	7	0.00202711	1.06395
mgv1a006855m	932	10	0.00326582	1.06589
mgv1a003438m	1189	42	0.0110564	1.06795
mgv1a007104m	772	25	0.00966909	1.06959
mgv1a002478m	1649	43	0.00748072	1.07042
mgv1a000834m	2716	9	0.00100937	1.071
mgv1a004368m	1504	31	0.00599194	1.07171
mgv1a000051m	4623	215	0.0132617	1.07227
mgv1a016469m	278	8	0.00878258	1.07387
mgv1a006684m	1003	20	0.00583186	1.07653
mgv1a002046m	1500	5	0.00105628	1.07877
mgv1a017493m	160	3	0.00649445	1.07896
mgv1a014105m	513	1	0.000782079	1.08124
mgv1a004054m	1215	48	0.0116846	1.08247
mgv1a000722m	2117	16	0.00224597	1.08302
mgv1a023735m	11676	38	0.000944737	1.08304
mgv1a026670m	1344	55	0.0117357	1.08494
mgv1a001953m	1383	8	0.00184588	1.08576
[truncated: 420 more rows]

## Sheet: Adaptive Divergence
PTP Gene Model	Number of Taxa in Alignment	Length of Alignment (codons)	p-value (M8a -vs- M8)	q-value (M8a -vs- M8 )
mgv1a005415m	6	308	4.48e-07	0.000266
mgv1a023977m	7	348	8.94e-07	0.000427
mgv1a000977m	7	788	1.1e-06	0.0005
mgv1a004447m	6	449	1.25e-06	0.000546
mgv1a011293m	7	193	2.86e-06	0.00091
mgv1a002505m	7	391	3.2e-06	0.000952
mgv1a000181m	7	877	1.27e-05	0.00239
mgv1a007104m	6	332	2.16e-05	0.00335
mgv1a007565m	7	339	2.62e-05	0.00384
mgv1a007526m	7	265	3.26e-05	0.0045
mgv1a009756m	6	210	3.43e-05	0.00468
mgv1a003307m	7	512	3.54e-05	0.00472
mgv1a012095m	3	194	5.83e-05	0.00672
mgv1a006668m	7	304	0.000273	0.0207
mgv1a003752m	7	447	0.000304	0.0219
mgv1a008054m	7	237	0.000311	0.0222
mgv1a007983m	7	238	0.000365	0.025
mgv1a003991m	6	336	0.000373	0.0255
mgv1a023715m	7	836	0.000591	0.0334
mgv1a011492m	6	169	0.000624	0.0344
mgv1a009222m	6	169	0.000673	0.0361
mgv1a005806m	7	285	0.000822	0.0405
mgv1a009214m	6	299	0.000979	0.0434
mgv1a000286m	7	875	0.0011	0.0467
mgv1a008840m	8	127	0.00122	0.0499
mgv1a003906m	7	461	0.00123	0.0501
mgv1a000051m	6	1777	0.0014	0.0536
mgv1a009046m	6	253	0.00146	0.0548
mgv1a004618m	7	386	0.00169	0.0609
mgv1a000129m	8	990	0.00169	0.0609
mgv1a010244m	6	270	0.00172	0.0611
mgv1a025411m	6	470	0.00177	0.0622
mgv1a015149m	7	106	0.00194	0.0653
mgv1a011283m	6	225	0.00207	0.0674
mgv1a000321m	7	1060	0.00231	0.0715
mgv1a006803m	5	259	0.00233	0.0716
mgv1a005887m	6	284	0.00249	0.0745
mgv1a000108m	7	1391	0.00259	0.076
mgv1a018842m	8	277	0.00281	0.0796
mgv1a011355m	5	164	0.00326	0.0869
mgv1a001880m	7	499	0.0034	0.0892
mgv1a000391m	7	775	0.00382	0.0961
mgv1a007367m	6	233	0.00396	0.0983
mgv1a004465m	7	358	0.000624	0.0344*
mgv1a010363m	6	227	6.94e-07	0.00035*
mgv1a010292m	7	232	0.0044	0.105
mgv1a000106m	7	1391	0.00447	0.106
mgv1a008203m	7	199	0.00446	0.106
mgv1a019461m	5	180	0.00455	0.107
mgv1a003098m	8	339	0.00461	0.108
mgv1a015270m	7	42	0.00472	0.11
mgv1a000559m	7	776	0.00501	0.114
mgv1a004321m	7	437	0.00508	0.114
mgv1a009582m	7	248	0.00524	0.117
mgv1a014866m	7	83	0.00534	0.118
mgv1a006722m	7	313	0.00529	0.118
mgv1a024117m	7	501	0.00568	0.121
mgv1a007885m	5	238	0.00565	0.121
mgv1a005785m	6	312	0.00585	0.123
mgv1a001141m	7	699	0.00595	0.124
mgv1a012042m	5	181	0.00591	0.124
mgv1a005054m	6	347	0.00628	0.128
mgv1a020937m	6	131	0.00658	0.132
mgv1a011799m	6	204	0.00701	0.137
mgv1a002354m	7	621	0.00722	0.14
mgv1a003614m	7	389	0.00734	0.141
mgv1a000871m	7	546	0.00753	0.144
mgv1a002845m	6	455	0.00801	0.149
mgv1a000164m	7	1220	0.00836	0.152
mgv1a010058m	6	261	0.00877	0.156
mgv1a000591m	7	823	0.00903	0.159
mgv1a023243m	7	1102	0.00943	0.163
mgv1a005101m	7	362	0.00997	0.169
mgv1a004733m	7	296	0.0103	0.172
mgv1a000822m	6	566	0.0104	0.173
mgv1a006132m	6	363	0.0112	0.181
mgv1a003876m	7	322	0.0118	0.187
mgv1a004532m	6	364	0.0119	0.187
mgv1a026462m	7	91	0.0121	0.188
mgv1a011888m	6	184	0.0127	0.193
mgv1a002984m	7	302	0.0129	0.195
mgv1a000407m	7	900	0.0141	0.204
mgv1a023005m	5	206	0.0151	0.212
mgv1a002111m	7	446	0.0152	0.213
mgv1a026670m	7	274	0.0154	0.214
mgv1a013619m	7	155	0.0157	0.215
mgv1a006901m	7	309	0.0155	0.215
mgv1a000742m	7	723	0.0163	0.22
mgv1a020766m	7	945	0.0168	0.224
mgv1a003253m	7	462	0.0171	0.225
mgv1a016170m	6	97	0.0176	0.229
mgv1a003330m	6	377	0.0176	0.23
mgv1a000814m	6	573	0.0177	0.23
mgv1a011838m	5	187	0.018	0.232
mgv1a008328m	6	189	0.0182	0.233
mgv1a001197m	7	603	0.0184	0.233
mgv1a002041m	7	492	0.019	0.238
mgv1a027043m	7	334	0.0194	0.24
mgv1a011945m	7	128	0.0195	0.241
mgv1a000020m	7	2213	0.0203	0.246
mgv1a015448m	7	103	0.0206	0.247
mgv1a011691m	6	205	0.0208	0.248
mgv1a002012m	6	551	0.0215	0.251
mgv1a002499m	7	486	0.0215	0.252
mgv1a000296m	7	1053	0.0217	0.253
mgv1a003606m	5	389	0.022	0.255
mgv1a005015m	6	297	0.0222	0.257
mgv1a009608m	7	209	0.0225	0.259
mgv1a006069m	6	361	0.0226	0.259
mgv1a002139m	7	568	0.0233	0.263
mgv1a019208m	5	346	0.0236	0.265
mgv1a001840m	7	581	0.024	0.269
mgv1a010991m	7	151	0.0244	0.271
mgv1a001315m	7	659	0.0252	0.277
mgv1a001303m	4	774	0.0259	0.28
mgv1a005131m	7	395	0.0258	0.28
mgv1a015573m	7	117	0.026	0.281
mgv1a000939m	7	577	0.0261	0.281
mgv1a007835m	6	365	0.0266	0.283
mgv1a007694m	6	270	0.0266	0.283
mgv1a000829m	7	825	0.0268	0.285
mgv1a022824m	7	188	0.0271	0.286
mgv1a009096m	8	243	0.0273	0.287
mgv1a000449m	7	903	0.0272	0.287
mgv1a007907m	6	263	0.0274	0.288
mgv1a014900m	6	157	0.0285	0.294
mgv1a002326m	7	553	0.0286	0.294
mgv1a003756m	8	361	0.0285	0.294
mgv1a012943m	7	208	0.0299	0.302
mgv1a007430m	8	213	0.0301	0.303
mgv1a006170m	7	379	0.0302	0.304
mgv1a011567m	6	216	0.0306	0.306
mgv1a000220m	7	1044	0.031	0.307
mgv1a009028m	5	225	0.0311	0.308
mgv1a002809m	7	487	0.0315	0.31
mgv1a014504m	6	140	0.0319	0.313
mgv1a000804m	7	750	0.0321	0.313
mgv1a023513m	7	219	0.0332	0.321
mgv1a007672m	7	272	0.0336	0.323
mgv1a005529m	7	396	0.0336	0.323
mgv1a017528m	7	56	0.0338	0.324
mgv11b020468m	7	556	0.0339	0.324
mgv1a009055m	8	235	0.0341	0.325
mgv1a005540m	7	327	0.0343	0.326
mgv1a010324m	7	217	0.0346	0.328
mgv1a002844m	6	498	0.0346	0.328
mgv1a006606m	7	298	0.035	0.329
mgv1a001876m	6	601	0.0356	0.331
mgv1a003275m	7	498	0.0358	0.332
mgv1a018871m	6	217	0.0358	0.333
mgv1a003664m	6	477	0.0366	0.338
mgv1a000875m	7	775	0.0376	0.344
mgv1a000652m	7	903	0.0377	0.344
mgv1a003439m	7	382	0.038	0.345
mgv1a006003m	6	390	0.038	0.345
mgv1a000568m	7	817	0.0387	0.348
mgv1a002092m	7	569	0.0387	0.348
mgv1a005368m	7	337	0.0388	0.348
mgv1a012325m	6	179	0.0398	0.354
mgv1a003377m	7	518	0.0401	0.356
mgv1a003147m	6	492	0.0406	0.357
mgv1a002077m	7	593	0.0416	0.362
mgv1a004485m	7	462	0.0424	0.367
mgv1a011704m	6	251	0.0428	0.368
mgv1a002162m	7	583	0.0433	0.371
mgv1a010032m	6	236	0.0438	0.373
mgv1a002232m	7	604	0.0466	0.387
mgv1a014105m	7	106	0.0471	0.389
mgv1a006498m	5	345	0.0481	0.395
mgv1a003434m	5	384	0.0493	0.399
mgv1a000319m	7	930	0.0494	0.399
mgv1a014740m	6	95	0.0504	0.403
mgv1a007382m	6	346	0.0505	0.404
mgv1a000794m	7	775	0.051	0.406
mgv1a000037m	7	1677	0.0518	0.41
mgv1a011044m	7	258	0.0523	0.411
mgv1a007440m	6	377	0.0523	0.411
mgv1a010375m	7	152	0.0526	0.412
mgv1a002762m	7	390	0.0536	0.416
mgv1a002114m	7	560	0.0546	0.419
mgv1a008905m	6	304	0.0553	0.421
mgv1a002142m	7	467	0.0558	0.423
mgv1a002757m	7	477	0.056	0.424
mgv1a016650m	4	60	0.0565	0.426
mgv1a006711m	7	294	0.0571	0.427
mgv1a009275m	6	269	0.0568	0.427
mgv1a000672m	7	780	0.0572	0.428
mgv1a002208m	7	585	0.0584	0.433
mgv1a025662m	5	607	0.0587	0.435
mgv1a017868m	6	95	0.0588	0.435
mgv1a008581m	5	184	0.0591	0.437
mgv1a012682m	7	161	0.0594	0.437
mgv1a010195m	7	210	0.0595	0.437
mgv1a004348m	7	440	0.0612	0.444
mgv1a009593m	7	215	0.0628	0.45
mgv1a007920m	7	279	0.065	0.459
mgv1a024394m	7	287	0.0659	0.462
mgv1a001997m	7	448	0.0657	0.462
mgv1a001038m	7	566	0.0673	0.467
mgv1a001513m	7	556	0.0681	0.469
mgv1a007270m	7	248	0.0678	0.469
mgv1a001471m	7	487	0.0685	0.47
mgv1a004985m	6	410	0.0746	0.493
mgv1a006748m	6	232	0.0765	0.499
mgv1a006251m	6	268	0.0765	0.499
mgv1a010583m	7	235	0.0771	0.5
mgv1a004151m	6	463	0.0773	0.501
mgv1a000190m	7	1282	0.0784	0.504
mgv1a009946m	6	290	0.0787	0.505
mgv1a002737m	6	436	0.0791	0.506
mgv1a005349m	7	409	0.0791	0.506
mgv1a005831m	7	258	0.0788	0.506
mgv1a023728m	6	486	0.0793	0.507
mgv1a006912m	6	309	0.0801	0.509
mgv1a005702m	7	270	0.081	0.512
mgv1a012286m	6	138	0.0829	0.518
mgv1a001861m	7	657	0.0835	0.52
mgv1a010754m	4	235	0.084	0.522
mgv1a011749m	7	202	0.0843	0.523
mgv1a017580m	7	41	0.0865	0.528
mgv1a010042m	6	285	0.0869	0.529
mgv1a003739m	8	351	0.0874	0.531
mgv1a000184m	7	1356	0.0887	0.535
mgv1a000435m	7	802	0.0903	0.54
mgv1a009305m	6	249	0.091	0.542
mgv1a004419m	7	371	0.0909	0.542
mgv1a015774m	7	92	0.0913	0.543
mgv1a016761m	6	82	0.0925	0.546
mgv1a000456m	7	893	0.0931	0.549
mgv1a004133m	7	304	0.094	0.551
mgv1a016253m	6	83	0.0936	0.551
mgv1a005165m	7	396	0.0948	0.552
mgv1a012672m	7	168	0.0947	0.552
mgv1a013891m	8	127	0.097	0.558
mgv1a000130m	7	1389	0.0968	0.558
mgv1a000012m	7	2305	0.0984	0.561
mgv1a012197m	3	171	0.0981	0.561
mgv1a000942m	7	640	0.0994	0.564
mgv1a003221m	6	459	0.0998	0.566
mgv1a010790m	9	155	0.103	0.575
mgv1a012750m	7	158	0.104	0.579
mgv1a026892m	7	136	0.104	0.579
mgv1a020926m	7	459	0.104	0.579
mgv1a000033m	7	1527	0.105	0.582
mgv1a006771m	7	310	0.106	0.587
mgv1a000229m	7	1048	0.107	0.588
mgv1a005492m	5	275	0.108	0.592
mgv1a004811m	7	451	0.109	0.597
mgv1a007415m	7	254	0.11	0.598
mgv1a001818m	7	653	0.11	0.598
mgv1a022220m	6	99	0.11	0.599
mgv1a024674m	4	91	0.111	0.602
mgv1a007420m	7	310	0.115	0.612
mgv1a022800m	7	435	0.114	0.612
mgv1a009960m	7	280	0.116	0.615
mgv1a016657m	6	88	0.117	0.617
mgv1a001119m	7	763	0.116	0.617
mgv1a002814m	6	432	0.118	0.622
mgv1a010537m	3	249	0.118	0.622
mgv1a011755m	6	226	0.119	0.623
mgv1a000269m	7	982	0.119	0.623
mgv1a012051m	7	181	0.12	0.624
mgv1a002579m	7	427	0.121	0.629
mgv1a003534m	7	400	0.128	0.65
mgv1a000005m	7	3221	0.13	0.657
mgv1a002412m	7	411	0.13	0.658
mgv1a000764m	6	718	0.13	0.658
mgv1a006187m	7	296	0.131	0.659
mgv1a000305m	7	1049	0.132	0.661
mgv1a005414m	7	407	0.132	0.661
mgv1a000222m	7	1033	0.133	0.663
mgv1a017275m	7	59	0.133	0.663
mgv1a002240m	7	581	0.133	0.663
mgv1a003412m	6	420	0.134	0.665
mgv1a000277m	6	752	0.135	0.667
mgv1a005522m	8	272	0.137	0.673
mgv1a010062m	6	276	0.139	0.678
mgv1a010761m	6	239	0.139	0.678
mgv1a005116m	8	315	0.139	0.678
mgv1a006525m	5	401	0.14	0.679
mgv1a011509m	6	185	0.14	0.681
mgv1a008565m	6	245	0.141	0.682
mgv1a007303m	5	327	0.143	0.688
mgv1a026549m	6	300	0.144	0.689
mgv1a024902m	6	199	0.145	0.692
mgv1a003116m	7	345	0.145	0.692
mgv1a004058m	6	273	0.146	0.692
mgv1a001296m	7	580	0.146	0.692
mgv1a013069m	6	184	0.146	0.692
mgv1a007296m	6	349	0.146	0.692
mgv1a003747m	3	361	0.146	0.693
mgv1a011715m	7	222	0.147	0.694
mgv1a000381m	7	977	0.148	0.696
mgv1a006960m	7	284	0.148	0.696
mgv1a010760m	7	225	0.149	0.699
mgv1a014720m	7	109	0.15	0.7
mgv1a008891m	5	300	0.15	0.7
mgv1a013425m	6	139	0.151	0.703
mgv1a007541m	3	322	0.151	0.703
mgv1a004899m	7	283	0.153	0.708
mgv1a007073m	6	339	0.154	0.708
mgv1a003282m	7	411	0.155	0.71
mgv1a001969m	7	560	0.155	0.712
mgv1a000611m	8	685	0.156	0.713
mgv1a005789m	7	213	0.156	0.714
mgv1a000344m	6	818	0.156	0.714
mgv1a009170m	7	203	0.157	0.715
mgv1a017762m	5	362	0.157	0.716
mgv1a003059m	6	452	0.158	0.717
mgv1a014440m	7	90	0.158	0.718
mgv1a001214m	7	444	0.159	0.72
mgv1a017901m	7	460	0.16	0.721
mgv1a010002m	6	240	0.161	0.722
mgv1a007175m	6	270	0.161	0.722
mgv1a017023m	5	76	0.161	0.723
mgv1a001894m	7	545	0.163	0.727
mgv1a001921m	7	495	0.163	0.728
mgv1a002113m	6	625	0.164	0.729
mgv1a012131m	6	220	0.165	0.729
mgv11b018210m	3	187	0.165	0.73
mgv1a007039m	7	235	0.165	0.73
mgv1a006631m	6	257	0.166	0.733
mgv1a008507m	6	233	0.167	0.733
mgv1a009614m	6	199	0.167	0.735
mgv1a005814m	7	275	0.167	0.735
mgv1a000995m	7	733	0.173	0.751
mgv1a011919m	6	149	0.174	0.753
mgv1a003584m	8	339	0.175	0.754
mgv1a001369m	7	569	0.176	0.756
mgv1a023143m	6	284	0.178	0.761
mgv1a006325m	7	346	0.179	0.761
mgv1a000547m	7	892	0.179	0.762
mgv1a007905m	3	278	0.179	0.762
mgv1a026883m	6	463	0.179	0.764
mgv1a026523m	7	195	0.183	0.772
mgv1a003122m	7	401	0.186	0.778
mgv1a026620m	6	923	0.186	0.779
mgv1a019265m	7	580	0.187	0.78
mgv1a001283m	7	588	0.187	0.78
mgv1a014970m	7	104	0.188	0.781
mgv1a017068m	8	40	0.188	0.781
mgv1a003554m	5	419	0.187	0.781
mgv1a001741m	8	455	0.188	0.782
mgv1a016335m	7	103	0.19	0.785
mgv1a004399m	8	323	0.189	0.785
mgv1a005817m	6	341	0.189	0.785
mgv1a004503m	7	384	0.19	0.787
mgv1a003190m	8	330	0.192	0.789
mgv1a003787m	7	345	0.193	0.792
mgv1a012407m	6	178	0.193	0.792
mgv1a008206m	7	269	0.193	0.793
mgv1a006171m	8	304	0.194	0.794
mgv1a002653m	6	404	0.194	0.794
mgv1a014045m	8	141	0.195	0.796
mgv1a003149m	8	374	0.195	0.796
mgv1a005900m	6	300	0.195	0.796
mgv1a008339m	7	312	0.195	0.796
mgv1a006578m	7	340	0.198	0.801
mgv1a012615m	8	184	0.199	0.802
mgv1a002823m	7	526	0.199	0.802
mgv1a012120m	8	128	0.198	0.802
mgv1a004003m	6	470	0.199	0.802
mgv1a000707m	7	851	0.2	0.803
mgv1a002209m	8	513	0.201	0.805
mgv1a024971m	6	255	0.201	0.805
mgv1a005176m	8	332	0.202	0.807
mgv1a011257m	8	179	0.202	0.807
mgv1a008391m	6	299	0.203	0.808
mgv1a002007m	6	414	0.206	0.812
mgv1a004889m	5	345	0.206	0.812
mgv1a010678m	5	229	0.207	0.816
mgv1a001800m	7	584	0.21	0.82
mgv1a007263m	6	350	0.21	0.822
mgv1a015230m	5	120	0.213	0.826
mgv1a014208m	6	121	0.215	0.83
mgv1a002157m	8	444	0.217	0.836
mgv1a010771m	7	166	0.218	0.838
mgv1a003137m	7	387	0.22	0.841
mgv1a012445m	6	165	0.22	0.841
mgv1a021085m	7	639	0.22	0.842
mgv1a005402m	7	394	0.22	0.842
mgv1a000298m	6	975	0.22	0.842
mgv1a009326m	6	193	0.222	0.845
mgv1a003804m	7	377	0.222	0.845
mgv1a007570m	7	278	0.224	0.848
mgv1a002290m	8	422	0.226	0.852
mgv1a000692m	6	822	0.226	0.852
mgv1a001285m	6	653	0.227	0.854
mgv1a009300m	7	266	0.227	0.854
mgv1a005984m	6	337	0.228	0.856
mgv1a006749m	7	337	0.229	0.857
mgv1a004049m	7	364	0.232	0.862
mgv1a014352m	6	132	0.233	0.864
mgv1a009555m	6	239	0.234	0.865
mgv1a005333m	7	360	0.234	0.865
mgv1a006347m	7	327	0.234	0.865
mgv1a014135m	8	138	0.235	0.867
mgv1a004397m	6	315	0.236	0.868
mgv1a016204m	6	74	0.236	0.87
mgv1a001108m	8	545	0.237	0.871
mgv1a005790m	6	363	0.238	0.872
mgv1a008584m	7	250	0.238	0.872
mgv1a005837m	6	410	0.238	0.872
mgv1a010414m	7	246	0.238	0.872
mgv1a007685m	6	230	0.238	0.873
mgv1a015537m	7	143	0.243	0.882
mgv1a007261m	6	299	0.243	0.882
mgv1a014842m	3	60	0.25	0.896
mgv1a000986m	6	562	0.253	0.901
mgv1a013685m	7	172	0.254	0.904
mgv1a022072m	8	378	0.254	0.904
mgv1a009145m	7	220	0.255	0.906
mgv1a008652m	8	221	0.256	0.908
mgv1a004368m	6	463	0.257	0.909
mgv1a000214m	7	1152	0.258	0.91
mgv1a014277m	7	164	0.26	0.912
mgv1a010963m	7	272	0.261	0.915
mgv1a011728m	7	237	0.263	0.917
mgv1a021022m	6	328	0.265	0.921
mgv1a006830m	6	344	0.265	0.921
mgv1a000725m	8	612	0.266	0.922
mgv1a004292m	6	442	0.266	0.922
mgv1a003327m	7	448	0.267	0.925
mgv1a020843m	6	505	0.267	0.925
mgv1a006138m	6	245	0.269	0.927
mgv1a012096m	6	191	1	0.929
mgv1a021916m	7	454	0.418	0.929
mgv1a001250m	7	733	0.932	0.929
mgv1a014029m	7	152	1	0.929
mgv1a005342m	7	327	1	0.929
mgv1a004376m	6	272	0.281	0.929
mgv1a007972m	6	293	1	0.929
mgv1a000787m	7	603	0.955	0.929
mgv1a011423m	5	192	1	0.929
mgv1a002734m	7	518	0.958	0.929
mgv1a012406m	7	117	1	0.929
mgv1a011280m	7	199	0.689	0.929
mgv1a019537m	7	415	0.935	0.929
mgv1a014165m	6	120	1	0.929
mgv1a006908m	7	258	0.761	0.929
mgv1a000509m	7	939	0.948	0.929
mgv1a009023m	7	233	1	0.929
mgv1a012142m	6	112	1	0.929
mgv1a010488m	7	241	0.992	0.929
mgv1a015892m	7	78	0.735	0.929
mgv1a004039m	7	402	0.845	0.929
mgv1a000496m	6	975	1	0.929
mgv1a004455m	7	267	0.906	0.929
mgv1a002934m	6	498	1	0.929
mgv1a001413m	5	544	0.933	0.929
mgv1a010159m	7	217	1	0.929
mgv1a002902m	7	284	0.951	0.929
mgv1a012075m	7	209	0.983	0.929
mgv1a015586m	5	93	0.991	0.929
mgv1a012057m	6	252	0.981	0.929
mgv1a004209m	6	434	0.423	0.929
mgv1a005243m	7	336	0.84	0.929
mgv1a006034m	6	304	0.921	0.929
mgv1a009204m	7	191	1	0.929
mgv1a019166m	5	189	0.813	0.929
mgv1a003306m	6	460	0.938	0.929
mgv1a007053m	7	234	0.73	0.929
mgv1a001589m	7	557	1	0.929
mgv1a015378m	6	142	0.976	0.929
mgv1a016677m	7	81	0.979	0.929
mgv1a009964m	6	231	0.97	0.929
mgv1a025256m	4	231	0.403	0.929
mgv1a023984m	6	145	1	0.929
mgv1a008271m	6	218	0.478	0.929
mgv1a012983m	7	190	1	0.929
mgv1a005481m	7	369	0.963	0.929
mgv1a008641m	6	275	1	0.929
mgv1a010957m	7	200	1	0.929
mgv1a006713m	6	324	1	0.929
mgv1a009947m	7	213	0.954	0.929
mgv1a001976m	7	621	1	0.929
mgv1a010036m	8	192	0.978	0.929
mgv1a006139m	7	260	0.928	0.929
mgv1a005542m	7	359	0.742	0.929
mgv1a009778m	7	122	1	0.929
mgv1a006834m	5	251	0.523	0.929
mgv1a006210m	7	399	0.962	0.929
mgv1a002395m	7	573	1	0.929
mgv1a007827m	8	240	0.322	0.929
mgv1a009125m	7	287	0.984	0.929
mgv1a023841m	6	186	1	0.929
mgv1a001672m	7	664	1	0.929
mgv1a005965m	8	311	1	0.929
mgv1a015303m	6	137	0.975	0.929
mgv1a002660m	7	477	0.96	0.929
mgv1a025892m	7	146	0.458	0.929
mgv1a004178m	7	426	0.603	0.929
mgv1a009883m	9	131	0.982	0.929
mgv1a003795m	7	486	0.966	0.929
mgv1a018050m	3	289	0.491	0.929
mgv1a015623m	5	140	0.991	0.929
mgv1a015927m	5	94	0.366	0.929
mgv1a013777m	7	162	0.981	0.929
mgv1a009631m	5	192	0.575	0.929
mgv1a000066m	7	1132	1	0.929
mgv1a010974m	7	200	0.675	0.929
mgv1a013134m	6	158	1	0.929
mgv1a007772m	7	198	1	0.929
mgv1a000733m	7	678	0.343	0.929
mgv1a002246m	7	519	1	0.929
mgv1a003830m	5	376	0.836	0.929
mgv1a009795m	8	222	1	0.929
mgv1a016565m	7	103	0.978	0.929
mgv1a021489m	7	194	0.983	0.929
mgv1a002449m	7	492	0.951	0.929
mgv1a013937m	3	145	0.989	0.929
mgv1a008784m	7	201	1	0.929
mgv1a005245m	7	405	1	0.929
mgv1a010752m	7	245	1	0.929
mgv1a011025m	7	271	1	0.929
mgv1a002511m	6	481	0.813	0.929
mgv1a005842m	6	343	1	0.929
mgv1a015223m	7	114	0.926	0.929
mgv1a018228m	5	118	1	0.929
mgv1a014677m	6	129	0.984	0.929
mgv1a015286m	7	102	0.984	0.929
mgv1a011087m	8	140	0.724	0.929
mgv1a000152m	8	960	1	0.929
mgv1a010527m	6	274	0.726	0.929
mgv1a018727m	5	150	0.561	0.929
mgv1a017412m	6	56	1	0.929
mgv1a015693m	5	103	0.991	0.929
mgv1a013643m	7	141	0.982	0.929
mgv1a013634m	7	136	0.976	0.929
mgv1a003287m	7	420	1	0.929
mgv1a003846m	6	426	1	0.929
mgv1a003065m	8	413	1	0.929
mgv1a001501m	7	560	0.903	0.929
mgv1a002796m	7	521	0.765	0.929
mgv1a005327m	6	317	1	0.929
mgv1a004211m	6	259	0.531	0.929
mgv1a014965m	6	156	1	0.929
mgv1a010103m	5	188	0.98	0.929
mgv1a007334m	7	280	0.963	0.929
mgv1a006587m	8	251	1	0.929
mgv1a000556m	7	934	0.881	0.929
mgv1a009825m	7	238	1	0.929
mgv1a007797m	6	265	0.446	0.929
mgv1a015907m	7	68	0.975	0.929
mgv1a004900m	7	361	1	0.929
mgv1a007125m	7	355	0.509	0.929
mgv1a025277m	6	236	0.468	0.929
mgv1a002825m	7	452	0.797	0.929
mgv1a005036m	8	298	0.957	0.929
mgv1a004835m	8	320	0.972	0.929
mgv1a014009m	7	146	0.99	0.929
mgv1a004737m	6	356	0.925	0.929
mgv1a007982m	8	185	0.506	0.929
mgv1a019620m	7	546	0.948	0.929
mgv1a006998m	7	227	1	0.929
mgv1a012053m	8	130	1	0.929
mgv1a003863m	7	433	0.834	0.929
mgv1a002873m	4	448	1	0.929
mgv1a016727m	7	81	1	0.929
mgv1a003035m	6	366	1	0.929
mgv1a002513m	6	579	0.938	0.929
mgv1a004121m	6	286	0.898	0.929
mgv1a004174m	6	428	0.34	0.929
mgv1a002942m	7	439	0.831	0.929
mgv1a000859m	5	628	0.588	0.929
mgv1a000285m	7	927	0.861	0.929
mgv1a015811m	7	88	0.573	0.929
mgv1a008548m	6	259	1	0.929
mgv1a010470m	7	189	0.907	0.929
mgv1a005146m	6	357	0.421	0.929
mgv1a006387m	6	419	0.951	0.929
mgv1a007044m	7	243	0.936	0.929
mgv1a000877m	7	671	0.493	0.929
mgv1a001222m	7	741	0.742	0.929
mgv1a006608m	7	291	1	0.929
mgv1a011893m	7	157	0.979	0.929
mgv1a002545m	6	586	0.969	0.929
mgv1a012609m	8	137	1	0.929
mgv1a014358m	7	164	1	0.929
mgv1a010582m	7	241	1	0.929
mgv1a002794m	6	541	1	0.929
mgv1a012264m	7	78	0.983	0.929
mgv1a011380m	6	154	0.386	0.929
mgv1a001869m	7	505	0.943	0.929
mgv1a010662m	7	229	0.967	0.929
mgv1a009586m	8	180	0.958	0.929
mgv1a002746m	7	429	1	0.929
mgv1a006585m	7	349	0.79	0.929
mgv1a012800m	6	157	1	0.929
mgv1a001447m	7	745	0.54	0.929
mgv1a019477m	6	328	0.946	0.929
mgv1a005070m	7	311	1	0.929
mgv1a010831m	7	198	0.918	0.929
mgv1a025131m	6	369	0.921	0.929
mgv1a010776m	6	262	0.932	0.929
mgv1a012369m	6	206	0.929	0.929
mgv1a011163m	7	200	0.749	0.929
mgv1a005993m	7	265	0.958	0.929
mgv1a003353m	7	345	0.98	0.929
mgv1a027044m	6	632	1	0.929
mgv1a000801m	7	574	0.513	0.929
mgv1a000390m	7	992	0.525	0.929
mgv1a007676m	8	207	0.588	0.929
mgv1a010439m	8	192	0.668	0.929
mgv1a002086m	7	301	1	0.929
mgv1a006379m	6	304	1	0.929
mgv1a026120m	6	154	0.325	0.929
mgv1a024330m	7	91	1	0.929
mgv1a015278m	4	95	1	0.929
mgv1a001125m	6	694	0.933	0.929
mgv1a016236m	7	87	0.977	0.929
mgv1a006949m	6	295	0.527	0.929
mgv1a000635m	7	846	0.55	0.929
mgv1a007360m	4	323	0.39	0.929
mgv1a006848m	6	337	1	0.929
mgv1a015580m	5	114	1	0.929
mgv1a012119m	7	213	1	0.929
mgv1a000857m	7	731	0.927	0.929
mgv1a027137m	5	245	1	0.929
mgv1a011241m	7	220	0.845	0.929
mgv1a004014m	7	417	1	0.929
mgv1a024182m	7	241	0.899	0.929
mgv1a002338m	7	527	0.914	0.929
mgv1a008291m	6	207	1	0.929
mgv1a017317m	6	62	1	0.929
mgv1a015751m	7	91	1	0.929
mgv1a007504m	7	224	1	0.929
mgv1a013629m	7	126	1	0.929
mgv1a010751m	7	233	0.842	0.929
mgv1a006620m	6	286	1	0.929
mgv1a020075m	7	95	1	0.929
mgv1a005924m	7	233	0.37	0.929
mgv1a002001m	7	571	1	0.929
mgv1a025006m	7	221	0.977	0.929
mgv1a006328m	4	310	0.976	0.929
mgv1a001083m	6	737	0.317	0.929
mgv1a019319m	5	201	0.665	0.929
mgv1a000055m	7	1685	0.715	0.929
mgv1a012690m	6	180	0.98	0.929
mgv1a011092m	4	182	1	0.929
mgv1a013374m	4	153	0.995	0.929
mgv1a006985m	7	287	1	0.929
mgv1a002436m	7	436	0.955	0.929
mgv1a006583m	4	302	1	0.929
mgv1a012922m	7	155	0.982	0.929
mgv1a000648m	6	705	0.936	0.929
mgv1a010805m	5	196	0.579	0.929
mgv1a008501m	7	266	0.543	0.929
mgv1a001555m	6	574	0.985	0.929
mgv1a013771m	6	109	1	0.929
mgv1a013171m	6	141	0.571	0.929
mgv1a004959m	7	393	1	0.929
mgv1a019671m	7	284	0.953	0.929
mgv1a001127m	7	758	0.989	0.929
mgv1a004731m	8	264	1	0.929
mgv1a012028m	7	207	0.922	0.929
mgv1a011464m	6	180	0.719	0.929
mgv1a007304m	7	306	0.928	0.929
mgv1a013902m	6	198	0.91	0.929
mgv1a003882m	8	385	0.69	0.929
mgv1a008972m	6	278	0.937	0.929
mgv1a009441m	8	168	1	0.929
mgv1a011276m	7	173	0.822	0.929
mgv1a014679m	7	96	1	0.929
mgv1a012395m	7	145	1	0.929
mgv1a009509m	7	203	1	0.929
mgv1a001286m	7	587	0.55	0.929
mgv1a003104m	7	447	1	0.929
mgv1a003080m	7	476	1	0.929
mgv1a002628m	6	500	1	0.929
mgv1a026246m	9	341	1	0.929
mgv1a001167m	7	646	0.312	0.929
mgv1a011444m	6	140	0.826	0.929
mgv1a012995m	7	144	1	0.929
mgv1a003911m	7	355	0.917	0.929
mgv1a000400m	6	878	0.482	0.929
mgv1a012498m	9	120	1	0.929
mgv1a005447m	8	236	0.965	0.929
mgv1a020683m	7	198	0.793	0.929
mgv1a013507m	8	147	0.993	0.929
mgv1a003160m	8	360	0.608	0.929
mgv1a016568m	7	97	0.6	0.929
mgv1a007635m	7	272	0.921	0.929
mgv1a002954m	7	445	0.946	0.929
mgv1a002541m	7	452	0.383	0.929
mgv1a008935m	8	205	1	0.929
mgv1a006731m	7	276	0.952	0.929
mgv1a023703m	5	107	0.748	0.929
mgv1a013159m	7	140	0.993	0.929
mgv1a001641m	6	602	0.946	0.929
mgv1a014845m	6	168	0.975	0.929
mgv1a000978m	7	678	0.582	0.929
mgv1a002472m	7	498	0.529	0.929
mgv1a004843m	7	346	0.959	0.929
mgv1a016608m	6	101	0.983	0.929
mgv1a003438m	4	383	1	0.929
mgv1a003971m	6	458	0.944	0.929
mgv1a025768m	6	615	0.838	0.929
mgv1a008830m	4	212	0.982	0.929
mgv1a011487m	6	177	0.564	0.929
mgv1a000609m	7	806	1	0.929
mgv1a001121m	7	731	0.422	0.929
mgv1a008446m	7	262	0.866	0.929
mgv1a016040m	8	69	0.977	0.929
mgv1a000501m	7	655	0.811	0.929
mgv1a006510m	6	253	0.954	0.929
mgv1a014991m	6	104	0.463	0.929
mgv1a006581m	6	373	1	0.929
mgv1a011738m	7	158	1	0.929
mgv1a008824m	7	248	0.961	0.929
mgv1a009970m	7	268	0.953	0.929
mgv1a012316m	8	161	1	0.929
mgv1a026137m	6	191	0.302	0.929
mgv1a009161m	7	309	1	0.929
mgv1a006055m	6	349	0.95	0.929
mgv1a010043m	7	203	1	0.929
mgv1a018666m	5	213	1	0.929
mgv1a011178m	7	182	1	0.929
mgv1a005210m	7	210	0.582	0.929
mgv1a013602m	7	168	0.838	0.929
mgv1a004699m	7	284	1	0.929
mgv1a004316m	4	432	0.951	0.929
mgv1a016232m	8	105	0.994	0.929
mgv1a001688m	7	508	0.276	0.929
mgv1a006438m	7	217	0.932	0.929
mgv1a012798m	6	139	0.954	0.929
mgv1a016427m	7	88	1	0.929
mgv1a010630m	7	271	0.948	0.929
mgv1a001984m	6	471	0.566	0.929
mgv1a003892m	7	379	0.878	0.929
mgv1a025191m	5	97	1	0.929
mgv1a013538m	6	155	1	0.929
mgv1a007302m	7	340	0.312	0.929
mgv1a017661m	8	794	0.414	0.929
mgv1a000070m	7	1621	0.949	0.929
mgv1a002169m	6	604	0.98	0.929
mgv1a017810m	7	57	0.783	0.929
mgv1a002944m	4	287	1	0.929
mgv1a005428m	6	429	1	0.929
mgv1a009057m	5	191	0.546	0.929
mgv1a004434m	7	372	0.957	0.929
mgv1a020642m	5	737	0.754	0.929
mgv1a013225m	6	185	1	0.929
mgv1a005258m	7	405	0.923	0.929
mgv1a008030m	7	249	0.506	0.929
mgv1a012269m	7	205	0.984	0.929
mgv1a013986m	6	169	0.978	0.929
mgv1a025258m	5	265	1	0.929
mgv1a001104m	7	595	0.283	0.929
mgv1a008324m	7	232	1	0.929
mgv1a002110m	6	584	1	0.929
mgv1a013201m	7	171	1	0.929
mgv1a015081m	6	115	1	0.929
mgv1a010200m	6	223	0.931	0.929
mgv1a015813m	8	73	1	0.929
mgv1a012043m	7	224	1	0.929
mgv1a002920m	7	513	0.394	0.929
mgv1a008011m	5	207	1	0.929
mgv1a010089m	6	236	0.944	0.929
mgv1a001087m	6	629	1	0.929
mgv1a008554m	7	235	1	0.929
mgv1a003919m	7	475	1	0.929
mgv1a005982m	5	227	1	0.929
mgv1a019605m	7	177	1	0.929
mgv1a002503m	7	328	0.635	0.929
mgv1a011204m	7	177	1	0.929
mgv1a013073m	7	187	0.525	0.929
mgv1a001747m	7	467	1	0.929
mgv1a000903m	7	591	1	0.929
mgv1a007409m	8	235	0.881	0.929
mgv1a004663m	8	258	0.486	0.929
mgv1a002295m	8	439	1	0.929
mgv1a013720m	7	138	0.411	0.929
mgv1a002767m	7	564	0.886	0.929
mgv1a002080m	6	586	0.293	0.929
mgv1a016384m	6	109	1	0.929
mgv1a002667m	8	370	1	0.929
mgv1a004908m	7	325	0.932	0.929
mgv1a005177m	6	388	0.799	0.929
mgv1a006300m	4	234	1	0.929
mgv1a011506m	7	129	0.454	0.929
mgv1a021151m	6	83	0.292	0.929
mgv1a003950m	6	436	1	0.929
mgv1a004599m	6	343	0.955	0.929
mgv1a000985m	7	551	1	0.929
mgv1a009558m	7	255	0.908	0.929
mgv1a005403m	5	289	1	0.929
mgv1a001662m	6	505	0.94	0.929
mgv1a007615m	8	239	0.957	0.929
mgv1a023683m	7	884	0.921	0.929
mgv1a015003m	3	146	0.979	0.929
mgv1a015459m	7	92	1	0.929
mgv1a003082m	6	524	1	0.929
mgv1a003729m	7	432	0.958	0.929
mgv1a006038m	7	322	0.93	0.929
mgv1a019703m	6	351	0.986	0.929
mgv1a008220m	7	256	0.27	0.929
mgv1a012182m	7	159	1	0.929
mgv1a000357m	7	963	0.937	0.929
mgv1a012493m	7	204	1	0.929
mgv1a016316m	6	79	0.991	0.929
mgv1a001345m	6	508	0.522	0.929
mgv1a024496m	9	260	0.711	0.929
mgv1a001635m	7	594	0.396	0.929
mgv1a009993m	7	229	1	0.929
mgv1a004873m	6	381	0.331	0.929
mgv1a013950m	7	174	1	0.929
mgv1a001085m	7	664	1	0.929
mgv1a009183m	7	213	0.753	0.929
mgv1a003269m	7	450	0.97	0.929
mgv1a000500m	7	727	0.543	0.929
mgv1a011042m	7	161	1	0.929
mgv1a002501m	7	529	0.428	0.929
mgv1a003633m	7	400	0.961	0.929
mgv1a000293m	7	743	0.868	0.929
mgv1a001749m	7	536	0.507	0.929
mgv1a008820m	7	230	1	0.929
mgv1a013810m	7	146	1	0.929
mgv1a016661m	7	86	1	0.929
mgv1a000627m	7	859	0.923	0.929
mgv1a006273m	8	274	1	0.929
mgv1a003647m	7	384	0.932	0.929
mgv1a009287m	7	271	0.974	0.929
mgv1a003004m	6	439	1	0.929
mgv1a014348m	5	143	1	0.929
mgv1a004633m	7	299	0.786	0.929
mgv1a009035m	5	231	0.941	0.929
mgv1a014163m	7	128	0.714	0.929
mgv1a008678m	6	287	0.904	0.929
mgv1a013668m	6	177	1	0.929
mgv1a016108m	7	107	0.995	0.929
mgv1a015449m	6	115	0.994	0.929
mgv1a002484m	7	460	0.976	0.929
mgv1a013564m	5	122	0.986	0.929
mgv1a008655m	4	229	0.988	0.929
mgv1a014615m	7	122	1	0.929
mgv1a003086m	7	454	0.482	0.929
mgv1a012213m	7	145	1	0.929
mgv1a009530m	7	265	0.928	0.929
mgv1a000879m	7	747	0.815	0.929
mgv1a011784m	6	122	0.991	0.929
mgv1a015722m	7	103	1	0.929
mgv1a013562m	7	157	1	0.929
mgv1a015577m	6	85	1	0.929
mgv1a012666m	7	164	1	0.929
mgv1a024059m	5	243	0.946	0.929
mgv1a017248m	6	61	0.986	0.929
mgv1a000479m	6	970	1	0.929
mgv1a013526m	7	154	0.992	0.929
mgv1a004428m	6	442	0.84	0.929
mgv1a007990m	6	312	0.775	0.929
mgv1a001397m	7	411	0.273	0.929
mgv1a016639m	5	71	1	0.929
mgv1a008208m	7	216	1	0.929
mgv1a002879m	7	326	0.923	0.929
mgv1a017601m	10	24	1	0.929
mgv1a012906m	7	140	1	0.929
mgv1a018471m	8	472	0.444	0.929
mgv1a004204m	7	357	0.982	0.929
mgv1a004358m	7	392	0.943	0.929
mgv1a013177m	6	151	1	0.929
mgv1a005288m	7	439	1	0.929
mgv1a014638m	6	127	1	0.929
mgv1a004984m	6	268	0.935	0.929
mgv1a013037m	6	140	1	0.929
mgv1a007499m	7	317	0.93	0.929
mgv1a013816m	6	140	0.98	0.929
mgv1a000907m	7	723	1	0.929
mgv1a005519m	7	397	0.887	0.929
mgv1a004659m	6	458	0.322	0.929
mgv1a006075m	6	360	0.944	0.929
mgv1a007013m	7	307	0.936	0.929
mgv1a000365m	7	1008	1	0.929
mgv1a000330m	9	485	0.911	0.929
mgv1a008742m	6	262	0.935	0.929
mgv1a021017m	6	56	1	0.929
mgv1a006703m	7	292	0.967	0.929
mgv1a010028m	7	248	1	0.929
mgv1a015947m	7	125	0.982	0.929
mgv1a004075m	7	428	0.922	0.929
mgv1a014384m	8	113	0.874	0.929
mgv1a003513m	7	428	0.923	0.929
mgv1a012822m	7	166	0.383	0.929
mgv1a001639m	7	618	0.722	0.929
mgv1a007351m	7	335	1	0.929
mgv1a024722m	7	341	0.668	0.929
mgv1a016325m	4	80	1	0.929
mgv1a012309m	7	196	1	0.929
mgv1a007936m	7	329	0.93	0.929
mgv1a008936m	7	204	0.278	0.929
mgv1a000127m	8	799	0.938	0.929
mgv1a001311m	7	716	0.939	0.929
mgv1a006812m	3	341	0.942	0.929
mgv1a000201m	7	1255	1	0.929
mgv1a010521m	7	176	0.459	0.929
mgv1a012291m	5	214	0.984	0.929
mgv1a013360m	7	112	1	0.929
mgv1a008693m	7	277	0.679	0.929
mgv1a011358m	7	166	0.77	0.929
mgv1a007459m	6	237	0.834	0.929
mgv1a001293m	4	562	0.921	0.929
mgv1a001301m	7	589	0.967	0.929
mgv1a003856m	7	382	0.575	0.929
mgv1a004134m	7	302	0.797	0.929
mgv1a016700m	6	46	1	0.929
mgv1a000353m	7	782	1	0.929
mgv1a002098m	7	496	0.899	0.929
mgv1a006369m	8	314	0.951	0.929
mgv1a012292m	5	200	1	0.929
mgv1a008177m	6	311	0.965	0.929
mgv1a001135m	7	687	0.925	0.929
mgv1a014267m	7	167	0.983	0.929
mgv1a009187m	6	233	0.986	0.929
mgv1a013017m	8	185	1	0.929
mgv1a015044m	11	166	1	0.929
mgv1a015554m	6	120	1	0.929
mgv1a005619m	7	354	0.924	0.929
mgv1a003968m	6	321	0.595	0.929
mgv1a003913m	7	474	0.928	0.929
mgv1a008627m	7	278	0.925	0.929
mgv1a013976m	7	119	0.47	0.929
mgv1a002992m	7	377	1	0.929
mgv1a014588m	6	123	0.98	0.929
mgv1a003637m	6	470	0.923	0.929
mgv1a004113m	7	370	1	0.929
mgv1a013814m	7	157	0.979	0.929
mgv1a015494m	8	85	0.979	0.929
mgv1a001554m	7	595	1	0.929
mgv1a010388m	7	172	1	0.929
mgv1a005263m	7	369	1	0.929
mgv1a003735m	7	321	0.317	0.929
mgv1a007804m	7	265	1	0.929
mgv1a005376m	8	298	0.934	0.929
mgv1a006615m	6	352	0.925	0.929
mgv1a011348m	6	171	0.983	0.929
mgv1a006308m	6	395	0.99	0.929
mgv1a011550m	6	189	0.344	0.929
mgv1a002971m	7	463	0.951	0.929
mgv1a001913m	7	470	0.963	0.929
mgv1a002304m	8	437	1	0.929
mgv1a004077m	8	363	0.648	0.929
mgv1a007824m	6	275	0.972	0.929
mgv1a006605m	7	316	0.976	0.929
mgv1a012202m	7	227	1	0.929
mgv1a022557m	6	111	1	0.929
mgv1a013116m	6	133	1	0.929
mgv1a013584m	7	127	0.908	0.929
mgv1a001183m	7	733	0.932	0.929
mgv1a009031m	8	203	0.923	0.929
mgv1a027073m	6	405	1	0.929
mgv1a015522m	6	133	1	0.929
mgv1a010612m	6	180	1	0.929
mgv1a010938m	7	172	0.975	0.929
mgv1a000245m	6	1183	0.95	0.929
mgv1a000595m	7	755	0.872	0.929
mgv1a011491m	4	139	0.989	0.929
mgv1a013915m	8	120	1	0.929
mgv1a005703m	7	390	0.335	0.929
mgv1a001514m	6	507	0.964	0.929
mgv1a015708m	7	97	1	0.929
mgv1a002839m	7	519	1	0.929
mgv1a009569m	7	189	0.976	0.929
mgv1a015762m	6	121	0.979	0.929
mgv1a003321m	8	376	0.801	0.929
mgv1a008793m	7	329	0.953	0.929
mgv1a012359m	6	202	1	0.929
mgv1a010817m	6	227	1	0.929
mgv1a009811m	6	282	0.63	0.929
mgv1a006574m	6	354	1	0.929
mgv1a014731m	7	126	1	0.929
mgv1a008171m	7	167	0.991	0.929
mgv1a026887m	7	434	0.846	0.929
mgv1a008397m	7	193	1	0.929
mgv1a004609m	7	367	0.952	0.929
mgv1a006642m	8	288	0.966	0.929
mgv1a013062m	6	142	0.98	0.929
mgv1a013015m	6	178	1	0.929
mgv1a002128m	7	499	0.921	0.929
mgv1a019806m	7	204	0.977	0.929
mgv1a015556m	7	101	0.981	0.929
mgv1a011861m	6	139	0.293	0.929
mgv1a003029m	7	408	0.987	0.929
mgv1a007883m	7	340	1	0.929
mgv1a012962m	7	145	0.981	0.929
mgv1a020712m	10	314	0.937	0.929
mgv1a014669m	6	145	0.986	0.929
mgv1a005374m	7	380	0.92	0.929
mgv1a016370m	8	64	0.976	0.929
mgv1a009045m	5	237	1	0.929
mgv1a001105m	7	730	0.977	0.929
mgv1a000487m	7	688	0.993	0.929
mgv1a013566m	6	142	0.984	0.929
mgv1a002088m	7	492	1	0.929
mgv1a020896m	7	293	0.934	0.929
mgv1a001922m	6	570	1	0.929
mgv1a006006m	7	347	1	0.929
mgv1a000834m	7	845	0.318	0.929
mgv1a011618m	7	154	1	0.929
mgv1a010553m	6	265	0.935	0.929
mgv1a016569m	5	81	0.982	0.929
mgv1a010144m	7	292	0.965	0.929
mgv1a008600m	7	313	0.928	0.929
mgv1a012742m	5	152	0.461	0.929
mgv1a016469m	7	79	0.977	0.929
mgv1a024819m	8	320	0.933	0.929
mgv1a005575m	5	244	0.947	0.929
mgv1a016296m	8	77	0.99	0.929
mgv1a003818m	7	438	1	0.929
mgv1a012791m	6	151	0.709	0.929
mgv1a002947m	8	434	0.928	0.929
mgv1a022738m	5	222	1	0.929
mgv1a004632m	7	304	0.931	0.929
mgv1a010745m	4	213	1	0.929
mgv1a004927m	6	383	1	0.929
mgv1a009410m	6	310	1	0.929
mgv1a005225m	7	251	0.946	0.929
mgv1a002913m	6	367	1	0.929
mgv1a001324m	7	732	1	0.929
mgv1a001788m	7	418	1	0.929
mgv1a012090m	7	169	1	0.929
mgv1a013190m	9	84	0.57	0.929
mgv1a005705m	6	391	0.568	0.929
mgv1a014036m	4	133	0.98	0.929
mgv1a014007m	7	149	1	0.929
mgv1a013342m	7	201	0.352	0.929
mgv1a017021m	7	80	1	0.929
mgv1a000537m	7	852	1	0.929
mgv1a002589m	6	431	0.83	0.929
mgv1a004395m	7	424	0.95	0.929
mgv1a010873m	7	198	0.947	0.929
mgv1a000650m	8	525	1	0.929
mgv1a007327m	7	283	0.936	0.929
mgv1a000151m	7	1125	1	0.929
mgv1a000893m	6	673	0.943	0.929
mgv1a005908m	6	375	0.975	0.929
mgv1a013972m	7	125	0.979	0.929
mgv1a001595m	7	631	0.504	0.929
mgv1a016112m	8	99	0.976	0.929
mgv1a010702m	7	194	0.984	0.929
mgv1a011721m	8	194	0.715	0.929
mgv1a006385m	7	284	0.292	0.929
mgv1a003746m	7	406	0.384	0.929
mgv1a000481m	6	1020	1	0.929
mgv1a012953m	7	145	0.984	0.929
mgv1a020208m	6	700	0.94	0.929
mgv1a018028m	6	217	0.923	0.929
mgv1a006594m	7	302	1	0.929
mgv1a015236m	6	157	1	0.929
mgv1a006401m	5	309	0.931	0.929
mgv1a016482m	7	87	0.989	0.929
mgv1a001181m	8	536	1	0.929
mgv1a003053m	6	442	0.93	0.929
mgv1a004179m	7	406	1	0.929
mgv1a008352m	7	221	1	0.929
mgv1a012444m	5	183	0.979	0.929
mgv1a005364m	6	371	0.957	0.929
mgv1a015114m	3	124	1	0.929
mgv1a007617m	7	226	0.628	0.929
mgv1a006685m	6	398	1	0.929
mgv1a006632m	6	312	1	0.929
mgv1a015755m	7	81	1	0.929
mgv1a002780m	7	499	0.476	0.929
mgv1a008087m	7	225	0.612	0.929
mgv1a012882m	7	192	0.99	0.929
mgv1a003816m	4	454	0.927	0.929
mgv1a025992m	6	441	1	0.929
mgv1a007763m	7	283	0.956	0.929
mgv1a009352m	6	212	0.991	0.929
mgv1a011448m	6	228	0.301	0.929
mgv1a010987m	7	194	0.758	0.929
mgv1a015213m	7	87	1	0.929
mgv1a009780m	7	200	0.305	0.929
mgv1a002537m	6	314	0.551	0.929
mgv1a007266m	7	289	0.972	0.929
mgv1a001720m	6	536	0.931	0.929
mgv1a016031m	7	121	0.497	0.929
mgv1a012381m	6	207	0.994	0.929
mgv1a012434m	7	160	1	0.929
mgv1a015088m	7	115	1	0.929
mgv1a001483m	7	660	0.935	0.929
mgv1a008016m	7	278	0.319	0.929
mgv1a006795m	7	227	1	0.929
mgv1a011985m	5	148	0.951	0.929
mgv1a009547m	6	272	0.789	0.929
mgv1a005306m	7	367	1	0.929
mgv1a004379m	7	299	1	0.929
mgv1a003857m	8	328	0.963	0.929
mgv1a011565m	7	130	1	0.929
mgv1a004005m	7	473	1	0.929
mgv1a009373m	6	314	0.957	0.929
mgv1a001578m	7	546	0.684	0.929
mgv1a010620m	6	220	0.485	0.929
mgv1a004277m	7	472	1	0.929
mgv1a010606m	3	193	0.985	0.929
mgv1a005906m	3	313	0.953	0.929
mgv1a014316m	8	107	1	0.929
mgv1a000315m	6	1092	0.515	0.929
mgv1a013930m	8	131	0.977	0.929
mgv1a015021m	7	125	0.339	0.929
mgv1a010335m	7	243	0.952	0.929
mgv1a011379m	6	261	0.456	0.929
mgv1a006961m	3	284	1	0.929
mgv1a004020m	7	377	1	0.929
mgv1a003565m	7	359	0.379	0.929
mgv1a010189m	6	220	0.747	0.929
mgv1a001480m	7	406	0.946	0.929
mgv1a004619m	7	373	1	0.929
mgv1a001477m	6	657	0.912	0.929
mgv1a008232m	3	300	1	0.929
mgv1a000565m	8	574	0.936	0.929
mgv1a010511m	7	233	0.401	0.929
mgv1a015246m	6	100	0.976	0.929
mgv1a026966m	6	397	0.931	0.929
mgv1a006761m	6	346	0.403	0.929
mgv1a016009m	9	66	0.978	0.929
mgv1a014752m	6	103	0.975	0.929
mgv1a004400m	7	268	1	0.929
mgv1a006669m	6	318	0.413	0.929
mgv1a000192m	7	1169	0.881	0.929
mgv1a007246m	7	331	1	0.929
mgv1a012873m	7	167	1	0.929
mgv1a014984m	5	136	1	0.929
mgv1a011714m	7	216	1	0.929
mgv1a002703m	5	475	0.903	0.929
mgv1a009775m	7	232	0.551	0.929
mgv1a004218m	7	497	0.946	0.929
mgv1a016898m	6	91	1	0.929
mgv1a012417m	7	176	0.976	0.929
mgv1a009728m	7	254	1	0.929
mgv1a003013m	7	473	1	0.929
mgv1a008879m	5	192	0.992	0.929
mgv1a010332m	7	212	0.965	0.929
mgv1a011214m	7	147	0.986	0.929
mgv1a005084m	4	442	0.715	0.929
mgv1a000546m	7	858	0.405	0.929
mgv1a011651m	7	183	1	0.929
mgv1a012809m	6	146	0.979	0.929
mgv1a008795m	7	258	0.92	0.929
mgv1a003609m	7	296	0.443	0.929
mgv1a003744m	7	458	0.946	0.929
mgv1a001759m	7	474	0.92	0.929
mgv1a005113m	7	372	0.768	0.929
mgv1a007122m	3	317	0.929	0.929
mgv1a012259m	7	182	0.984	0.929
mgv1a001481m	7	566	0.922	0.929
mgv1a012976m	7	172	1	0.929
mgv1a006922m	7	177	0.979	0.929
mgv1a007668m	7	259	0.284	0.929
mgv1a000844m	6	750	0.609	0.929
mgv1a009817m	6	296	0.924	0.929
mgv1a015207m	3	141	1	0.929
mgv1a008776m	3	281	1	0.929
mgv1a014132m	3	182	0.981	0.929
mgv1a017229m	5	48	1	0.929
mgv1a008701m	7	258	0.817	0.929
mgv1a016432m	6	48	1	0.929
mgv1a011100m	7	235	0.928	0.929
mgv1a002241m	5	448	0.845	0.929
mgv1a003145m	6	356	0.958	0.929
mgv1a000099m	7	1553	0.533	0.929
mgv1a008770m	6	251	0.28	0.929
mgv1a012815m	5	195	0.964	0.929
mgv1a001027m	6	778	0.315	0.929
mgv1a012472m	4	129	0.977	0.929
mgv1a011469m	7	189	1	0.929
mgv1a025284m	4	149	1	0.929
mgv11b022793m	5	41	1	0.929
mgv1a001793m	7	409	1	0.929
mgv1a003938m	6	352	1	0.929
mgv1a002235m	7	568	0.271	0.929
mgv1a007877m	7	333	1	0.929
mgv1a002750m	7	552	1	0.929
mgv1a015152m	7	110	0.986	0.929
mgv1a011340m	6	254	0.962	0.929
mgv1a003760m	6	441	0.576	0.929
mgv1a003460m	7	500	0.952	0.929
mgv1a015052m	6	90	0.99	0.929
mgv1a010865m	8	203	0.975	0.929
mgv1a012196m	7	186	0.979	0.929
mgv1a000510m	7	953	0.442	0.929
mgv1a000827m	7	687	0.469	0.929
mgv1a004026m	7	432	1	0.929
mgv1a004931m	7	373	1	0.929
mgv1a001437m	7	652	0.95	0.929
mgv1a001633m	8	479	1	0.929
mgv1a008345m	5	268	1	0.929
mgv1a017288m	7	27	0.309	0.929
mgv1a001459m	7	652	0.971	0.929
mgv1a002418m	7	498	0.964	0.929
mgv1a002222m	6	583	0.94	0.929
mgv1a008028m	7	220	0.952	0.929
mgv1a015373m	7	115	1	0.929
mgv1a003947m	3	481	0.964	0.929
mgv1a003217m	6	370	0.542	0.929
mgv1a001619m	6	668	1	0.929
mgv1a007331m	7	204	1	0.929
mgv1a012760m	4	143	0.604	0.929
mgv1a010224m	7	230	1	0.929
mgv1a011056m	8	148	1	0.929
mgv1a011875m	6	229	1	0.929
mgv1a011212m	7	167	0.981	0.929
mgv1a004105m	7	370	0.778	0.929
mgv1a001603m	7	632	0.946	0.929
mgv1a016607m	7	105	0.989	0.929
mgv1a007432m	6	329	1	0.929
mgv1a019263m	6	402	0.958	0.929
mgv1a000973m	6	739	0.74	0.929
mgv1a010409m	7	196	0.985	0.929
mgv1a002294m	7	543	1	0.929
mgv1a000475m	7	857	1	0.929
mgv1a015367m	6	136	0.957	0.929
mgv1a006041m	5	371	0.947	0.929
mgv1a015866m	7	43	0.977	0.929
mgv1a002396m	6	544	0.627	0.929
mgv1a006486m	5	274	1	0.929
mgv1a010922m	3	234	0.739	0.929
mgv1a015453m	7	105	0.986	0.929
mgv1a002820m	6	420	0.939	0.929
mgv1a001629m	6	645	0.37	0.929
mgv1a014797m	7	113	1	0.929
mgv1a007278m	9	110	0.482	0.929
mgv1a013716m	6	155	0.976	0.929
mgv1a018181m	7	385	1	0.929
mgv1a008906m	8	242	0.729	0.929
mgv1a002903m	7	400	0.762	0.929
mgv1a019428m	6	335	1	0.929
mgv1a016461m	7	62	0.985	0.929
mgv1a010092m	6	234	1	0.929
mgv1a000969m	7	719	1	0.929
mgv1a012471m	6	187	0.432	0.929
mgv1a002878m	8	445	1	0.929
mgv1a012555m	6	160	1	0.929
mgv1a001989m	7	611	0.921	0.929
mgv1a015967m	4	127	1	0.929
mgv1a002215m	8	454	1	0.929
mgv1a017705m	7	58	1	0.929
mgv1a025096m	7	346	1	0.929
mgv1a000825m	7	835	0.949	0.929
mgv1a006060m	6	435	0.381	0.929
mgv1a009205m	7	190	0.479	0.929
mgv1a014100m	7	158	0.976	0.929
mgv1a003301m	6	383	0.622	0.929
mgv1a001435m	7	563	0.508	0.929
mgv1a020140m	7	196	0.966	0.929
mgv1a002786m	7	443	1	0.929
mgv1a001154m	7	766	1	0.929
mgv11b010237m	6	180	0.35	0.929
mgv1a008163m	6	328	0.978	0.929
mgv1a003561m	4	434	0.737	0.929
mgv1a012350m	5	153	0.976	0.929
mgv1a006863m	6	290	0.953	0.929
mgv1a014263m	7	170	0.998	0.929
mgv1a007650m	6	257	0.564	0.929
mgv1a016676m	7	60	0.976	0.929
mgv1a005652m	6	352	0.345	0.929
mgv1a024085m	6	326	0.289	0.929
mgv1a014839m	7	97	1	0.929
mgv1a002107m	8	386	0.602	0.929
mgv1a018273m	7	1247	0.934	0.929
mgv1a016696m	6	101	0.976	0.929
mgv1a004107m	7	513	1	0.929
mgv1a007031m	8	259	1	0.929
mgv1a015433m	7	89	1	0.929
mgv1a010718m	7	224	0.991	0.929
mgv1a013013m	7	145	0.464	0.929
mgv1a009820m	6	227	0.967	0.929
mgv1a010658m	7	185	0.99	0.929
mgv1a007313m	6	309	0.977	0.929
mgv1a014893m	5	123	0.977	0.929
mgv1a003754m	6	413	0.958	0.929
mgv1a003701m	7	439	0.976	0.929
mgv1a002986m	4	422	0.931	0.929
mgv1a004929m	7	228	0.973	0.929
mgv1a005117m	7	336	1	0.929
mgv1a015717m	4	86	0.981	0.929
mgv1a000680m	3	746	0.935	0.929
mgv1a005080m	7	388	0.55	0.929
mgv1a006016m	7	269	1	0.929
mgv1a005792m	5	283	0.297	0.929
mgv1a008772m	4	220	0.498	0.929
mgv1a010372m	7	152	0.907	0.929
mgv1a005820m	7	305	0.965	0.929
mgv1a002668m	6	450	0.319	0.929
mgv1a002822m	6	554	0.277	0.929
mgv1a008344m	6	268	1	0.929
mgv1a008311m	6	299	1	0.929
mgv1a001627m	6	486	0.96	0.929
mgv1a020814m	6	322	1	0.929
mgv1a009313m	7	297	1	0.929
mgv1a004756m	7	311	0.957	0.929
mgv1a015175m	6	156	1	0.929
mgv1a006475m	6	374	1	0.929
mgv1a014114m	5	161	1	0.929
mgv1a011024m	7	131	0.851	0.929
mgv1a007503m	7	226	0.735	0.929
mgv1a008287m	7	200	1	0.929
mgv1a014493m	6	125	0.945	0.929
mgv1a006871m	7	342	0.934	0.929
mgv1a000147m	7	1358	0.862	0.929
mgv1a004611m	7	403	1	0.929
mgv1a008361m	7	196	1	0.929
mgv1a015486m	8	85	1	0.929
mgv1a015084m	6	127	0.977	0.929
mgv1a009579m	7	184	1	0.929
mgv1a007548m	8	276	0.576	0.929
mgv1a005359m	7	283	1	0.929
mgv1a002876m	6	403	0.843	0.929
mgv1a007595m	7	272	0.965	0.929
mgv1a015694m	6	87	0.975	0.929
mgv1a013563m	8	110	0.98	0.929
mgv1a012502m	6	180	1	0.929
mgv1a011584m	5	194	1	0.929
mgv1a012717m	7	114	1	0.929
mgv1a003457m	7	477	1	0.929
mgv1a011964m	6	135	1	0.929
mgv1a014776m	6	104	0.753	0.929
mgv1a014306m	6	150	1	0.929
mgv1a007004m	6	277	1	0.929
mgv1a007114m	8	294	0.991	0.929
mgv1a027080m	5	91	0.978	0.929
mgv1a003052m	6	411	0.924	0.929
mgv1a019731m	3	291	0.967	0.929
mgv1a008848m	7	230	1	0.929
mgv1a013599m	6	138	0.763	0.929
mgv1a027011m	6	245	0.282	0.929
mgv1a002478m	7	323	0.934	0.929
mgv1a013632m	6	174	0.983	0.929
mgv1a013083m	6	200	0.994	0.929
mgv1a013999m	8	146	1	0.929
mgv1a003678m	6	481	1	0.929
mgv1a005616m	6	386	0.362	0.929
mgv1a002782m	6	394	0.295	0.929
mgv1a009977m	6	207	0.323	0.929
mgv1a002233m	10	418	0.931	0.929
mgv1a000230m	7	904	0.96	0.929
mgv1a005345m	8	295	1	0.929
mgv1a026395m	6	220	0.32	0.929
mgv1a009002m	6	199	0.303	0.929
mgv1a007945m	6	223	0.931	0.929
mgv1a011543m	7	190	1	0.929
mgv1a017328m	7	63	0.979	0.929
mgv1a018523m	6	79	0.978	0.929
mgv1a010842m	4	245	0.518	0.929
mgv1a012403m	5	150	0.613	0.929
mgv1a007839m	7	279	1	0.929
mgv1a010162m	6	177	0.989	0.929
mgv1a001416m	5	485	1	0.929
mgv1a001630m	7	468	1	0.929
mgv1a007274m	6	287	0.924	0.929
mgv1a016280m	7	75	0.975	0.929
mgv1a004863m	7	397	0.94	0.929
mgv1a002315m	7	455	0.959	0.929
mgv1a013529m	7	131	0.976	0.929
mgv1a005244m	7	329	1	0.929
mgv1a010708m	6	235	0.397	0.929
mgv1a027105m	6	402	0.785	0.929
mgv1a002993m	7	491	0.956	0.929
mgv1a009483m	7	161	0.978	0.929
mgv1a001304m	6	616	0.929	0.929
mgv1a005493m	8	317	0.277	0.929
mgv1a000616m	7	827	0.926	0.929
mgv1a009577m	7	285	1	0.929
mgv1a005715m	6	324	0.38	0.929
mgv1a002417m	7	545	0.683	0.929
mgv1a005078m	6	391	0.839	0.929
mgv1a016415m	4	61	0.966	0.929
mgv1a013055m	5	142	0.815	0.929
mgv1a007938m	7	313	0.615	0.929
mgv1a009479m	7	178	0.978	0.929
mgv1a021721m	3	187	0.986	0.929
mgv1a014224m	7	125	0.994	0.929
mgv1a012500m	5	180	1	0.929
mgv1a003658m	7	275	0.953	0.929
mgv1a016672m	7	74	0.985	0.929
mgv11b015928m	7	79	0.986	0.929
mgv1a014787m	6	148	1	0.929
mgv1a016436m	6	97	0.995	0.929
mgv1a008372m	7	223	1	0.929
mgv1a014882m	6	133	1	0.929
mgv1a022656m	7	83	0.627	0.929
mgv1a006219m	8	280	1	0.929
mgv1a009681m	7	286	1	0.929
mgv1a007922m	7	264	0.922	0.929
mgv1a015098m	6	117	1	0.929
mgv1a012927m	7	133	0.448	0.929
mgv1a001740m	7	663	1	0.929
mgv1a021541m	7	66	0.613	0.929
mgv1a016327m	6	93	1	0.929
mgv1a002479m	7	633	0.899	0.929
mgv1a004734m	7	302	0.927	0.929
mgv1a006480m	6	304	1	0.929
mgv1a006278m	6	398	1	0.929
mgv1a017039m	8	81	0.975	0.929
mgv1a006980m	7	273	0.935	0.929
mgv1a000553m	7	886	0.976	0.929
mgv1a006757m	7	305	0.902	0.929
mgv1a008367m	7	272	0.47	0.929
mgv1a007524m	6	239	0.275	0.929
mgv1a026590m	6	115	0.987	0.929
mgv1a011790m	7	153	1	0.929
mgv1a026576m	6	584	1	0.929
mgv1a020091m	6	203	0.614	0.929
mgv1a009384m	7	299	1	0.929
mgv1a001168m	6	578	0.618	0.929
mgv1a022828m	8	89	1	0.929
mgv1a014218m	7	170	0.981	0.929
mgv1a003036m	6	295	1	0.929
mgv1a002514m	3	443	1	0.929
mgv1a005139m	8	287	1	0.929
mgv1a021132m	6	293	0.896	0.929
mgv1a015787m	6	118	1	0.929
mgv1a002135m	7	457	0.517	0.929
mgv1a011661m	6	196	0.966	0.929
mgv1a015626m	8	65	0.441	0.929
mgv1a019244m	8	380	0.968	0.929
mgv1a011082m	6	171	0.466	0.929
mgv1a002872m	8	429	0.8	0.929
mgv1a022713m	7	1084	1	0.929
mgv1a009069m	7	265	0.933	0.929
mgv1a002191m	6	475	1	0.929
mgv1a007027m	6	326	1	0.929
mgv1a008395m	7	311	0.637	0.929
mgv1a002403m	7	430	0.541	0.929
mgv1a003241m	6	483	0.961	0.929
mgv1a005697m	7	213	1	0.929
mgv1a025268m	6	411	1	0.929
mgv1a000991m	7	682	0.277	0.929
mgv1a008980m	6	341	1	0.929
mgv1a004196m	8	387	0.27	0.929
mgv1a005232m	6	302	0.557	0.929
mgv1a000198m	7	991	1	0.929
mgv1a004680m	7	407	1	0.929
mgv1a001174m	7	577	0.526	0.929
mgv1a016788m	8	61	0.978	0.929
mgv1a005489m	7	379	0.963	0.929
mgv1a012945m	3	149	0.975	0.929
mgv1a006927m	7	291	0.622	0.929
mgv1a000780m	7	796	0.914	0.929
mgv1a014022m	4	158	1	0.929
mgv1a002925m	7	501	1	0.929
mgv1a018735m	7	432	0.955	0.929
mgv1a008489m	8	270	1	0.929
mgv1a012768m	8	132	0.29	0.929
mgv1a001330m	7	682	1	0.929
mgv1a001853m	7	676	1	0.929
mgv1a003500m	6	428	1	0.929
mgv1a006663m	8	290	0.929	0.929
mgv1a020358m	6	361	0.727	0.929
mgv1a013853m	7	143	1	0.929
mgv1a012104m	7	177	0.978	0.929
mgv1a009544m	7	276	1	0.929
mgv1a021611m	6	160	1	0.929
mgv1a000897m	8	592	0.977	0.929
mgv1a010082m	3	162	0.981	0.929
mgv1a003629m	6	493	0.529	0.929
mgv1a000538m	7	769	0.935	0.929
mgv1a000883m	6	742	0.377	0.929
mgv1a011569m	6	214	0.981	0.929
mgv1a008707m	5	110	1	0.929
mgv1a004578m	6	355	0.926	0.929
mgv1a012593m	7	172	1	0.929
mgv1a014096m	7	129	0.979	0.929
mgv1a016237m	4	95	0.987	0.929
mgv1a006693m	7	314	0.961	0.929
mgv1a009988m	7	245	0.922	0.929
mgv1a009315m	7	221	1	0.929
mgv1a001503m	7	669	1	0.929
mgv1a013770m	7	151	0.984	0.929
mgv1a009294m	7	292	0.906	0.929
mgv1a007803m	6	323	0.94	0.929
mgv1a015529m	7	138	0.977	0.929
mgv11b022653m	5	102	1	0.929
mgv1a013661m	7	155	0.986	0.929
mgv1a008102m	6	273	0.529	0.929
mgv1a004652m	4	368	0.311	0.929
mgv1a012998m	7	193	1	0.929
mgv1a015574m	6	110	0.987	0.929
mgv1a007869m	7	253	1	0.929
mgv1a005328m	7	395	0.962	0.929
mgv1a005353m	7	340	1	0.929
mgv1a002414m	6	466	0.408	0.929
mgv1a015071m	6	136	0.981	0.929
mgv1a010646m	6	246	0.946	0.929
mgv1a006136m	7	268	1	0.929
mgv1a007531m	6	339	1	0.929
mgv1a015707m	7	75	1	0.929
mgv1a021743m	6	236	0.989	0.929
mgv1a000870m	7	629	0.853	0.929
mgv1a006850m	7	280	0.368	0.929
mgv1a004177m	7	339	0.955	0.929
mgv1a004442m	7	362	0.981	0.929
mgv1a008450m	6	263	0.933	0.929
mgv1a007425m	6	310	0.973	0.929
mgv1a001101m	7	705	0.497	0.929
mgv1a001361m	7	640	0.956	0.929
mgv1a005190m	6	341	0.753	0.929
mgv1a000425m	7	1010	1	0.929
mgv1a003337m	6	456	0.938	0.929
mgv1a005229m	7	243	1	0.929
mgv1a013334m	7	174	0.993	0.929
mgv1a005246m	7	281	1	0.929
mgv1a011132m	6	201	1	0.929
mgv1a000710m	7	777	1	0.929
mgv1a009053m	7	289	0.955	0.929
mgv1a013993m	6	150	0.987	0.929
mgv1a001577m	6	625	0.736	0.929
mgv1a007801m	7	283	0.402	0.929
mgv1a022515m	6	140	1	0.929
mgv1a006810m	8	285	0.945	0.929
mgv1a005073m	7	220	0.882	0.929
mgv1a020724m	7	246	1	0.929
mgv1a002751m	6	457	0.934	0.929
mgv1a000417m	8	580	0.944	0.929
mgv1a007093m	7	304	1	0.929
mgv1a013516m	6	144	1	0.929
mgv1a013593m	6	139	0.534	0.929
mgv1a014664m	6	131	1	0.929
mgv1a008537m	7	262	1	0.929
mgv1a022696m	7	294	1	0.929
mgv1a007171m	6	246	1	0.929
mgv1a003536m	6	322	1	0.929
mgv1a005088m	8	296	0.844	0.929
mgv1a011486m	8	136	1	0.929
mgv1a027041m	6	723	0.63	0.929
mgv1a015600m	7	79	1	0.929
mgv1a007833m	7	291	0.506	0.929
mgv1a009769m	7	294	1	0.929
mgv1a010605m	7	203	1	0.929
mgv1a000251m	7	802	0.493	0.929
mgv1a005228m	7	266	1	0.929
mgv1a025239m	5	65	1	0.929
mgv1a011231m	6	206	1	0.929
mgv1a016480m	6	68	0.979	0.929
mgv1a006274m	7	395	0.96	0.929
mgv1a000047m	7	1373	0.943	0.929
mgv1a010774m	7	259	1	0.929
mgv1a009372m	7	238	1	0.929
mgv1a002518m	8	406	0.334	0.929
mgv1a011115m	7	221	0.978	0.929
mgv1a012117m	6	178	0.78	0.929
mgv1a007700m	5	284	0.938	0.929
mgv1a002698m	7	557	0.52	0.929
mgv1a008601m	7	236	0.689	0.929
mgv1a003837m	7	359	0.495	0.929
mgv1a017011m	7	43	0.595	0.929
mgv1a000598m	7	747	0.932	0.929
mgv1a015077m	3	127	0.98	0.929
mgv1a007243m	6	286	0.286	0.929
mgv1a005351m	7	362	1	0.929
mgv1a009858m	7	130	1	0.929
mgv1a000923m	7	529	0.873	0.929
mgv1a001278m	7	671	1	0.929
mgv1a009364m	7	230	0.869	0.929
mgv1a013549m	5	106	1	0.929
mgv1a012326m	6	224	0.927	0.929
mgv1a004921m	6	416	0.936	0.929
mgv1a023661m	7	152	0.897	0.929
mgv1a000854m	7	715	1	0.929
mgv1a012394m	7	108	1	0.929
mgv1a010047m	5	180	1	0.929
mgv1a010510m	6	197	0.333	0.929
mgv1a002311m	6	605	0.921	0.929
mgv1a000513m	7	967	0.565	0.929
mgv1a014705m	7	133	0.977	0.929
mgv1a002629m	6	419	1	0.929
mgv1a012491m	6	171	0.991	0.929
mgv1a001050m	5	543	1	0.929
mgv1a006129m	7	366	0.927	0.929
mgv1a016079m	7	97	0.991	0.929
mgv1a003970m	7	274	0.98	0.929
mgv1a002257m	6	524	0.964	0.929
mgv1a026013m	6	214	1	0.929
mgv1a008207m	7	215	0.985	0.929
mgv1a006718m	6	339	0.921	0.929
mgv1a002785m	6	392	1	0.929
mgv1a006105m	6	270	0.946	0.929
mgv1a000606m	7	696	0.937	0.929
mgv1a007393m	7	373	0.947	0.929
mgv1a002091m	7	542	1	0.929
mgv1a000754m	7	906	0.932	0.929
mgv1a011868m	4	207	1	0.929
mgv1a010310m	6	212	1	0.929
mgv1a000773m	7	670	0.971	0.929
mgv1a004374m	7	354	0.337	0.929
mgv1a001746m	7	605	1	0.929
mgv1a008531m	6	200	0.877	0.929
mgv1a011779m	7	213	0.975	0.929
mgv1a004198m	7	414	0.921	0.929
mgv1a008404m	7	260	0.961	0.929
mgv1a015977m	8	100	0.98	0.929
mgv1a007077m	6	351	0.995	0.929
mgv1a022248m	7	225	1	0.929
mgv1a009271m	7	218	0.919	0.929
mgv1a010441m	7	278	0.356	0.929
mgv1a005840m	6	371	0.524	0.929
mgv1a012587m	4	134	1	0.929
mgv1a011507m	6	187	0.535	0.929
mgv1a007142m	7	273	0.933	0.929
mgv1a008892m	7	249	0.935	0.929
mgv1a012863m	7	202	0.987	0.929
mgv1a004598m	7	297	0.947	0.929
mgv1a000017m	7	2299	0.768	0.929
mgv1a015570m	7	93	0.92	0.929
mgv1a004091m	6	411	0.274	0.929
mgv1a004114m	7	476	0.959	0.929
mgv1a004085m	7	412	1	0.929
mgv1a003480m	7	461	0.318	0.929
mgv1a015252m	7	87	1	0.929
mgv1a003654m	7	387	0.418	0.929
mgv1a009590m	7	262	0.923	0.929
mgv1a014629m	6	157	0.976	0.929
mgv1a005422m	6	354	0.836	0.929
mgv1a012557m	3	162	0.976	0.929
mgv1a005066m	6	353	0.971	0.929
mgv1a008393m	7	230	1	0.929
mgv1a026312m	3	738	0.941	0.929
mgv1a000592m	7	815	0.931	0.929
mgv1a016103m	6	117	0.701	0.929
mgv1a014351m	6	149	0.986	0.929
mgv1a026225m	7	185	0.998	0.929
mgv1a002641m	6	483	1	0.929
mgv1a009295m	7	243	0.928	0.929
mgv1a024149m	8	201	0.984	0.929
mgv1a006250m	7	305	0.394	0.929
mgv1a000019m	7	2080	0.924	0.929
mgv1a021946m	8	71	1	0.929
mgv1a009673m	6	271	1	0.929
mgv1a008009m	7	264	1	0.929
mgv1a005532m	7	231	0.926	0.929
mgv1a001612m	7	619	0.588	0.929
mgv1a004497m	7	434	0.521	0.929
mgv1a022178m	7	651	0.695	0.929
mgv1a008022m	6	331	0.975	0.929
mgv1a005162m	6	397	0.877	0.929
mgv1a007315m	7	303	1	0.929
mgv1a000057m	7	1598	0.711	0.929
mgv1a006302m	7	300	0.968	0.929
mgv1a022703m	6	925	0.816	0.929
mgv1a004735m	6	396	1	0.929
mgv1a002766m	7	384	0.448	0.929
mgv1a011991m	8	168	0.81	0.929
mgv1a001404m	6	715	1	0.929
mgv1a004147m	7	394	0.979	0.929
mgv1a001103m	8	620	0.891	0.929
mgv1a007682m	6	347	1	0.929
mgv1a002664m	6	515	1	0.929
mgv1a001013m	5	619	0.962	0.929
mgv1a005022m	7	346	1	0.929
mgv1a000473m	7	820	0.281	0.929
mgv1a003758m	6	421	0.921	0.929
mgv1a009835m	7	130	1	0.929
mgv1a001028m	7	697	0.312	0.929
mgv1a015764m	6	82	0.98	0.929
mgv1a006706m	6	321	0.606	0.929
mgv1a010265m	7	237	0.777	0.929
mgv1a015204m	5	131	0.983	0.929
mgv1a002738m	7	481	1	0.929
mgv1a007679m	7	340	0.942	0.929
mgv1a001277m	7	719	1	0.929
mgv1a002370m	8	389	1	0.929
mgv1a016321m	7	75	1	0.929
mgv1a006939m	7	288	0.97	0.929
mgv1a022157m	7	69	0.692	0.929
mgv1a012244m	7	217	0.98	0.929
mgv1a003509m	7	466	1	0.929
mgv1a005513m	5	338	1	0.929
mgv1a014323m	8	145	1	0.929
mgv1a003684m	6	327	0.944	0.929
mgv1a009419m	7	231	1	0.929
mgv1a016092m	6	91	1	0.929
mgv1a001307m	7	670	0.769	0.929
mgv1a007932m	7	252	1	0.929
mgv1a001239m	7	704	0.95	0.929
mgv1a003891m	7	408	0.695	0.929
mgv1a008052m	7	268	1	0.929
mgv1a009592m	6	181	0.978	0.929
mgv1a019971m	6	341	0.866	0.929
mgv1a003433m	5	316	0.938	0.929
mgv1a015357m	7	101	0.274	0.929
mgv1a007511m	7	224	1	0.929
mgv1a009134m	7	220	1	0.929
mgv1a004852m	7	339	1	0.929
mgv1a019859m	6	600	0.925	0.929
mgv1a012384m	6	144	0.968	0.929
mgv1a002643m	6	497	0.431	0.929
mgv1a000350m	7	895	0.975	0.929
mgv1a025938m	5	346	1	0.929
mgv1a011264m	5	168	1	0.929
mgv1a003087m	7	499	0.612	0.929
mgv1a012212m	8	147	0.982	0.929
mgv1a011526m	5	174	1	0.929
mgv1a015105m	7	103	0.377	0.929
mgv1a012680m	7	200	0.995	0.929
mgv1a002562m	7	546	0.95	0.929
mgv1a009387m	6	267	1	0.929
mgv1a005777m	7	365	0.975	0.929
mgv1a005944m	7	315	0.89	0.929
mgv1a010544m	7	229	0.844	0.929
mgv1a003324m	7	390	0.942	0.929
mgv1a002882m	7	479	0.923	0.929
mgv1a002500m	7	570	0.928	0.929
mgv1a010246m	6	193	0.342	0.929
mgv1a006860m	6	255	0.977	0.929
mgv1a004995m	7	306	0.997	0.929
mgv1a003468m	7	535	0.921	0.929
mgv1a013595m	7	175	1	0.929
mgv1a008821m	7	278	0.965	0.929
mgv1a006903m	6	207	0.991	0.929
mgv1a002117m	7	458	1	0.929
mgv1a014066m	8	104	1	0.929
mgv1a008933m	7	209	1	0.929
mgv1a007375m	7	324	1	0.929
mgv1a019185m	4	83	0.985	0.929
mgv1a000799m	7	820	0.592	0.929
mgv1a022605m	5	104	1	0.929
mgv1a009166m	8	212	1	0.929
mgv1a011225m	7	192	1	0.929
mgv1a014131m	8	88	1	0.929
mgv1a012041m	7	198	0.743	0.929
mgv1a025481m	7	406	0.338	0.929
mgv1a000596m	7	791	0.954	0.929
mgv1a022265m	7	538	0.985	0.929
mgv1a006855m	8	216	0.537	0.929
mgv1a006570m	6	253	1	0.929
mgv1a010911m	7	232	1	0.929
mgv1a000687m	7	899	1	0.929
mgv1a008981m	7	236	0.541	0.929
mgv1a006386m	6	217	0.974	0.929
mgv1a002047m	6	649	0.295	0.929
mgv1a000084m	7	1597	0.923	0.929
mgv1a014415m	6	155	1	0.929
mgv1a012308m	6	160	0.977	0.929
mgv1a026687m	7	156	1	0.929
mgv1a013226m	6	161	0.902	0.929
mgv1a000333m	6	694	0.525	0.929
mgv1a003206m	6	535	0.929	0.929
mgv1a006868m	7	265	0.98	0.929
mgv1a003682m	7	444	0.921	0.929
mgv1a001153m	7	616	1	0.929
mgv1a009114m	6	308	1	0.929
mgv1a008117m	6	238	1	0.929
mgv1a015509m	5	117	0.978	0.929
mgv1a000142m	6	1186	0.313	0.929
mgv1a009694m	7	108	0.987	0.929
mgv1a014473m	6	127	1	0.929
mgv1a016590m	6	66	0.987	0.929
mgv1a008286m	7	249	0.605	0.929
mgv1a015802m	6	109	0.98	0.929
mgv1a000878m	8	591	0.309	0.929
mgv1a016834m	8	83	0.998	0.929
mgv1a005337m	7	363	0.957	0.929
mgv1a015628m	6	89	1	0.929
mgv1a004637m	7	329	0.463	0.929
mgv1a006429m	7	319	1	0.929
mgv1a004513m	8	355	1	0.929
mgv1a002038m	7	580	0.821	0.929
mgv1a016943m	5	60	1	0.929
mgv1a004180m	5	347	1	0.929
mgv1a002450m	7	515	0.691	0.929
mgv1a013361m	6	203	0.91	0.929
mgv1a001136m	5	763	0.426	0.929
mgv1a006974m	7	307	0.648	0.929
mgv1a005640m	7	280	0.96	0.929
mgv1a012327m	6	172	1	0.929
mgv1a006942m	7	279	0.923	0.929
mgv1a008289m	7	164	1	0.929
mgv1a000478m	7	930	1	0.929
mgv1a003326m	7	424	1	0.929
mgv1a005618m	7	358	0.524	0.929
mgv1a007743m	8	205	1	0.929
mgv1a001584m	6	576	0.762	0.929
mgv1a008788m	7	245	0.896	0.929
mgv1a012668m	6	201	0.368	0.929
mgv1a015165m	8	75	0.978	0.929
mgv1a008214m	5	254	0.945	0.929
mgv1a000720m	6	739	0.926	0.929
mgv1a003111m	6	390	0.729	0.929
mgv1a008625m	6	277	0.926	0.929
mgv1a010314m	7	255	0.972	0.929
mgv1a007416m	7	231	0.972	0.929
mgv1a000655m	6	758	1	0.929
mgv1a000600m	7	750	1	0.929
mgv1a003889m	7	367	1	0.929
mgv1a022679m	7	171	1	0.929
mgv1a010672m	8	193	0.976	0.929
mgv1a006874m	6	315	0.982	0.929
mgv1a000260m	7	957	0.682	0.929
mgv1a016148m	7	116	0.443	0.929
mgv1a005052m	7	306	0.928	0.929
mgv1a014651m	7	102	0.979	0.929
mgv1a002975m	7	465	1	0.929
mgv1a005369m	6	223	1	0.929
mgv1a004418m	6	478	1	0.929
mgv1a000186m	7	1195	0.911	0.929
mgv1a004074m	7	404	0.933	0.929
mgv1a000082m	7	1561	0.966	0.929
mgv1a013313m	8	126	0.986	0.929
mgv1a013328m	7	178	0.774	0.929
mgv1a006879m	7	394	1	0.929
mgv1a004141m	7	420	1	0.929
mgv1a019725m	6	469	0.522	0.929
mgv1a014413m	11	189	0.975	0.929
mgv1a004697m	7	381	1	0.929
mgv1a000581m	7	866	1	0.929
mgv1a012966m	6	181	0.782	0.929
mgv1a010980m	7	189	0.981	0.929
mgv1a003165m	7	462	0.95	0.929
mgv1a016575m	6	70	0.379	0.929
mgv1a001346m	7	598	1	0.929
mgv1a003437m	7	486	1	0.929
mgv1a017493m	6	49	0.981	0.929
mgv1a001650m	7	622	0.401	0.929
mgv1a001041m	6	610	1	0.929
mgv1a003089m	8	369	0.788	0.929
mgv1a010982m	7	265	0.428	0.929
mgv1a013881m	6	161	0.323	0.929
mgv1a015401m	6	150	0.988	0.929
mgv1a007854m	7	275	0.929	0.929
mgv1a014835m	4	92	0.983	0.929
mgv1a009265m	6	249	1	0.929
mgv1a008525m	7	330	1	0.929
mgv1a001750m	5	500	0.926	0.929
mgv1a010374m	7	195	0.775	0.929
mgv1a008937m	8	236	0.81	0.929
mgv1a007994m	6	336	0.353	0.929
mgv1a012289m	6	183	0.985	0.929
mgv1a004635m	7	309	0.954	0.929
mgv1a021808m	5	54	0.981	0.929
mgv1a006368m	7	346	1	0.929
mgv1a017968m	8	339	0.931	0.929
mgv1a004307m	6	391	1	0.929
mgv1a002224m	8	480	0.515	0.929
mgv1a001899m	6	533	0.444	0.929
mgv1a026945m	6	466	0.865	0.929
mgv1a010486m	8	227	0.925	0.929
mgv1a001488m	6	631	0.935	0.929
mgv1a015237m	7	112	0.792	0.929
mgv1a003564m	7	405	0.932	0.929
mgv1a011095m	7	210	1	0.929
mgv1a014957m	7	116	1	0.929
mgv1a003264m	6	496	0.971	0.929
mgv1a013671m	7	162	1	0.929
mgv1a008628m	6	232	1	0.929
mgv1a000945m	7	691	0.393	0.929
mgv1a010242m	6	210	1	0.929
mgv1a006774m	7	228	1	0.929
mgv1a000722m	6	878	0.537	0.929
mgv1a007176m	8	263	0.923	0.929
mgv1a007068m	7	301	1	0.929
mgv1a009848m	7	247	0.317	0.929
mgv1a001797m	7	634	0.313	0.929
mgv1a001221m	7	611	0.425	0.929
mgv1a015555m	8	90	1	0.929
mgv1a005454m	6	283	1	0.929
mgv1a007545m	3	225	0.977	0.929
mgv1a002760m	9	327	0.923	0.929
mgv1a006450m	6	408	0.959	0.929
mgv1a025345m	6	446	0.966	0.929
mgv1a002624m	6	531	0.931	0.929
mgv1a016111m	4	95	0.981	0.929
mgv1a009480m	8	108	1	0.929
mgv1a000080m	7	1548	0.499	0.929
mgv1a009453m	7	249	1	0.929
mgv1a016770m	4	70	0.956	0.929
mgv1a010808m	6	232	0.954	0.929
mgv1a012223m	7	165	0.976	0.929
mgv1a005010m	7	304	0.343	0.929
mgv1a004076m	7	455	0.432	0.929
mgv1a001978m	7	610	1	0.929
mgv1a005042m	6	369	0.338	0.929
mgv1a008687m	7	281	0.612	0.929
mgv1a010070m	7	218	0.977	0.929
mgv1a005859m	7	342	0.661	0.929
mgv1a002163m	6	476	0.419	0.929
mgv1a008949m	6	182	0.981	0.929
mgv1a017251m	5	33	0.993	0.929
mgv1a019019m	9	37	1	0.929
mgv1a015646m	8	93	1	0.929
mgv1a002912m	6	478	0.956	0.929
mgv1a006133m	5	258	0.428	0.929
mgv1a007455m	6	275	0.921	0.929
mgv1a009067m	7	225	1	0.929
mgv1a007042m	6	392	1	0.929
mgv1a010525m	5	179	0.994	0.929
mgv1a002683m	7	450	1	0.929
mgv1a004665m	6	417	1	0.929
mgv1a001756m	7	470	0.934	0.929
mgv1a008026m	7	258	1	0.929
mgv1a005453m	7	312	0.949	0.929
mgv11b016521m	6	281	1	0.929
mgv1a005362m	7	426	0.966	0.929
mgv1a011597m	7	186	1	0.929
mgv1a024165m	7	62	0.649	0.929
mgv1a002838m	6	453	0.953	0.929
mgv1a015661m	7	107	0.414	0.929
mgv1a002228m	7	552	1	0.929
mgv1a007974m	7	280	0.954	0.929
mgv1a012886m	7	158	1	0.929
mgv1a005680m	7	335	0.514	0.929
mgv1a001565m	7	692	0.655	0.929
mgv1a024691m	5	101	0.976	0.929
mgv1a016199m	6	114	0.981	0.929
mgv1a010480m	6	204	0.98	0.929
mgv1a012150m	6	153	1	0.929
mgv1a003588m	7	435	1	0.929
mgv1a000387m	5	777	0.466	0.929
mgv1a021747m	7	96	0.986	0.929
mgv1a009701m	8	170	0.797	0.929
mgv1a013971m	7	130	1	0.929
mgv1a012386m	6	193	1	0.929
mgv1a006290m	6	308	0.948	0.929
mgv1a015282m	6	121	0.994	0.929
mgv1a003075m	7	364	0.581	0.929
mgv1a006870m	7	341	0.962	0.929
mgv1a009491m	7	277	1	0.929
mgv1a007412m	6	293	0.727	0.929
mgv1a003115m	8	379	0.923	0.929
mgv1a003980m	6	370	0.934	0.929
mgv1a014188m	6	156	0.983	0.929
mgv1a000651m	7	866	0.45	0.929
mgv1a010040m	6	273	0.422	0.929
mgv1a000917m	7	746	0.927	0.929
mgv1a001261m	7	696	0.927	0.929
mgv1a008923m	7	217	0.597	0.929
mgv1a008051m	7	243	0.945	0.929
mgv1a023735m	7	3573	0.75	0.929
mgv1a023311m	11	63	0.987	0.929
mgv1a008952m	7	217	0.962	0.929
mgv1a001932m	7	551	0.494	0.929
mgv1a004441m	7	393	1	0.929
mgv1a015742m	4	106	0.976	0.929
mgv1a007637m	7	329	0.945	0.929
mgv1a002497m	7	523	0.808	0.929
mgv1a009605m	7	236	0.975	0.929
mgv1a010118m	7	258	1	0.929
mgv1a006269m	6	410	0.948	0.929
mgv1a015450m	6	72	1	0.929
mgv1a022906m	6	119	0.98	0.929
mgv1a012246m	7	220	1	0.929
mgv1a005945m	6	326	0.922	0.929
mgv1a000430m	7	787	0.707	0.929
mgv1a006684m	6	253	1	0.929
mgv1a007241m	6	316	0.807	0.929
mgv1a009647m	5	197	0.982	0.929
mgv1a002781m	6	488	0.676	0.929
mgv1a015785m	6	127	0.989	0.929
mgv1a016396m	4	81	0.989	0.929
mgv1a006861m	6	362	0.75	0.929
mgv1a010528m	7	213	1	0.929
mgv11b009377m	6	216	0.95	0.929
mgv1a009539m	7	236	0.607	0.929
mgv1a012878m	6	140	0.995	0.929
mgv1a005219m	7	387	0.781	0.929
mgv1a009261m	7	205	1	0.929
mgv1a004710m	7	287	0.349	0.929
mgv1a012482m	7	159	0.996	0.929
mgv1a015884m	6	96	1	0.929
mgv1a005682m	6	307	0.936	0.929
mgv1a006375m	7	252	0.693	0.929
mgv1a016276m	9	73	0.98	0.929
mgv1a015833m	7	101	1	0.929
mgv1a005304m	8	292	0.479	0.929
mgv1a002348m	7	328	0.974	0.929
mgv1a015769m	9	62	1	0.929
mgv1a001484m	7	634	1	0.929
mgv11b021346m	5	208	0.375	0.929
mgv1a004406m	7	456	0.976	0.929
mgv1a010507m	7	244	0.948	0.929
mgv1a011554m	7	243	1	0.929
mgv1a013973m	6	134	0.401	0.929
mgv1a014209m	7	163	1	0.929
mgv1a007208m	6	345	1	0.929
mgv1a009347m	7	207	0.414	0.929
mgv1a010735m	7	212	0.518	0.929
mgv1a004237m	6	345	0.971	0.929
mgv1a007767m	6	366	0.941	0.929
mgv1a016581m	5	57	1	0.929
mgv1a007445m	6	310	1	0.929
mgv1a015014m	6	140	0.286	0.929
mgv1a010992m	4	163	1	0.929
mgv1a009042m	8	208	1	0.929
mgv1a010621m	6	138	1	0.929
mgv1a005324m	7	228	1	0.929
mgv1a011594m	6	217	0.721	0.929
mgv1a014037m	6	167	0.978	0.929
mgv1a005695m	7	310	0.492	0.929
mgv1a002772m	7	559	0.936	0.929
mgv1a010429m	7	210	0.336	0.929
mgv1a005179m	6	323	0.942	0.929
mgv1a003522m	6	448	0.94	0.929
mgv1a003799m	4	369	0.53	0.929
mgv1a010640m	7	168	1	0.929
mgv1a011419m	6	155	0.727	0.929
mgv1a001409m	6	698	0.888	0.929
mgv1a012565m	3	182	1	0.929
mgv1a002604m	8	395	0.604	0.929
mgv1a005399m	7	380	0.73	0.929
mgv1a001138m	6	747	0.513	0.929
mgv1a004054m	6	328	0.848	0.929
[truncated: 134 more rows]
